# Supplementary material for: In Vitro Transformation of Primary Human CD34+ Cells by AML Fusion Oncogenes: Early Gene Expression Profiling Reveals Possible Drug Target in AML
Source: PubMed Central journal article supplement (PMC2929205; doi:10.1371/journal.pone.0012464), 2010-08-27
Supplement: pone.0012464.s001.pdf [file pone.0012464.s001.pdf]

**Table S1.** Genes deregulated by AML1-ETO at 6 h after transfection

| Probe set ID | Fold Change |        | Gene Name                                                                           | Gene Symbol |
|--------------|-------------|--------|-------------------------------------------------------------------------------------|-------------|
|              | Exp.1       | Exp.2  |                                                                                     |             |
| 216831_s_at  | 19827.19    | 955.64 | runt-related transcription factor 1;<br>translocated to, 1 (cyclin D-related)       | RUNX1T1     |
| 211181_x_at  | 16.10       | 112.28 | runt-related transcription factor 1<br>(acute myeloid leukemia 1; aml1<br>oncogene) | RUNX1       |
| 1560012_at   | 2.18        | 95.21  |                                                                                     |             |
| 228547_at    | 4.30        | 50.96  | neurexin 1                                                                          | NRXN1       |
| 204939_s_at  | 27.72       | 49.06  | phospholamban                                                                       | PLN         |
| 1563053_at   | 37.69       | 47.08  |                                                                                     |             |
| 205943_at    | 152.82      | 38.18  | tryptophan 2,3-dioxygenase                                                          | TDO2        |
| 235490_at    | 2.75        | 35.60  | transmembrane protein 107                                                           | TMEM107     |
| 1560676_at   | 4.02        | 33.91  |                                                                                     |             |
| 1553851_at   | 26.48       | 30.70  | Spi-C transcription factor (Spi-<br>1/PU.1 related)                                 | SPIC        |
| 233021_at    | 4.42        | 29.77  |                                                                                     |             |
| 1561657_at   | 2.09        | 27.50  |                                                                                     |             |
| 222456_s_at  | 2.97        | 27.03  | LIM domain and actin binding 1                                                      | LIMA1       |
| 205513_at    | 9.21        | 25.98  | transcobalamin I (vitamin B12<br>binding protein, R binder family)                  | TCN1        |
| 223962_at    | 4.43        | 25.57  | tetratricopeptide repeat domain 29                                                  | TTC29       |
| 228202_at    | 88.20       | 24.93  | phospholamban                                                                       | PLN         |
| 210650_s_at  | 7.11        | 24.77  | piccolo (presynaptic cytomatrix<br>protein)                                         | PCLO        |
| 219936_s_at  | 30.44       | 24.73  | G protein-coupled receptor 87                                                       | GPR87       |
| 206030_at    | 12.87       | 24.28  | aspartoacylase (Canavan disease)                                                    | ASPA        |
| 227006_at    | 6.27        | 23.65  | protein phosphatase 1, regulatory<br>(inhibitor) subunit 14A                        | PPP1R14A    |
| 1557733_a_at | 2.19        | 23.06  |                                                                                     |             |
| 240317_at    | 12.12       | 21.69  | protocadherin beta 4                                                                | PCDHB4      |
| 204938_s_at  | 49.40       | 19.62  | phospholamban                                                                       | PLN         |
| 239947_at    | 26.89       | 18.37  |                                                                                     |             |
| 236847_at    | 2.59        | 18.20  | chromosome 19 open reading frame<br>18                                              | C19orf18    |
| 223279_s_at  | 10.25       | 17.41  | uveal autoantigen with coiled-coil<br>domains and ankyrin repeats                   | UACA        |
| 203038_at    | 2.68        | 15.60  | protein tyrosine phosphatase, receptor<br>type, K                                   | PTPRK       |
| 219106_s_at  | 19.00       | 14.82  | kelch repeat and BTB (POZ) domain<br>containing 10                                  | KBTBD10     |
| 1565614_at   | 3.76        | 14.55  | zinc finger protein 337                                                             | ZNF337      |
| 1560746_at   | 6.54        | 14.47  | chromosome 1 open reading frame<br>118                                              | C1orf118    |
| 243581_at    | 3.39        | 14.40  |                                                                                     |             |
| 226534_at    | 26.11       | 14.40  | KIT ligand                                                                          | KITLG       |
| 210119_at    | 8.77        | 13.80  | potassium inwardly-rectifying<br>channel, subfamily J, member 15                    | KCNJ15      |
| 216456_at    | 2.93        | 13.47  |                                                                                     |             |

|             |        |       |                                                                                     |          |
|-------------|--------|-------|-------------------------------------------------------------------------------------|----------|
| 1565602_at  | 2.45   | 13.36 |                                                                                     |          |
| 243401_at   | 22.09  | 13.12 | formin-like 2                                                                       | FMNL2    |
| 230130_at   | 3.37   | 12.27 | slit homolog 2 (Drosophila)                                                         | SLIT2    |
| 211620_x_at | 9.98   | 12.18 | runt-related transcription factor 1<br>(acute myeloid leukemia 1; aml1<br>oncogene) | RUNX1    |
| 214079_at   | 26.51  | 11.64 | dehydrogenase/reductase (SDR<br>family) member 2                                    | DHRS2    |
| 237070_at   | 2.69   | 11.60 | transient receptor potential cation<br>channel, subfamily M, member 1               | TRPM1    |
| 243602_at   | 7.27   | 11.44 |                                                                                     |          |
| 238844_s_at | 3.46   | 11.42 | nephronophthisis 1 (juvenile)                                                       | NPHP1    |
| 232881_at   | 4.72   | 10.66 |                                                                                     |          |
| 207932_at   | 6.04   | 10.53 | interferon, alpha 8                                                                 | IFNA8    |
| 228964_at   | 2.33   | 10.09 | PR domain containing 1, with ZNF<br>domain                                          | PRDM1    |
| 215300_s_at | 4.34   | 10.02 | flavin containing monooxygenase 5                                                   | FMO5     |
| 215318_at   | 2.42   | 9.93  |                                                                                     |          |
| 210118_s_at | 2.28   | 9.93  | interleukin 1, alpha                                                                | IL1A     |
| 237663_at   | 2.34   | 9.87  |                                                                                     |          |
| 235355_at   | 306.27 | 9.77  |                                                                                     |          |
| 206381_at   | 27.42  | 9.54  | sodium channel, voltage-gated, type<br>II, alpha subunit                            | SCN2A    |
| 1553506_at  | 3.80   | 9.46  | carboxypeptidase O                                                                  | CPO      |
| 244334_at   | 12.27  | 9.36  | translocation associated membrane<br>protein 1-like 1                               | TRAM1L1  |
| 205844_at   | 12.36  | 9.32  | vanin 1                                                                             | VNN1     |
| 220311_at   | 12.95  | 9.20  | N-6 adenine-specific DNA<br>methyltransferase 1 (putative)                          | N6AMT1   |
| 211832_s_at | 7.15   | 9.20  | Mdm2, transformed 3T3 cell double<br>minute 2, p53 binding protein<br>(mouse)       | MDM2     |
| 239203_at   | 13.55  | 9.13  |                                                                                     |          |
| 240465_at   | 2.75   | 8.95  |                                                                                     |          |
| 223799_at   | 2.74   | 8.89  | KIAA1826                                                                            | KIAA1826 |
| 201939_at   | 17.84  | 8.77  | polo-like kinase 2 (Drosophila)                                                     | PLK2     |
| 207813_s_at | 10.43  | 8.77  | ferredoxin reductase                                                                | FDXR     |
| 235944_at   | 12.69  | 8.76  | hemicentin 1                                                                        | HMCN1    |
| 243272_at   | 4.47   | 8.64  |                                                                                     |          |
| 223395_at   | 102.06 | 8.63  | ABI gene family, member 3 (NESH)<br>binding protein                                 | ABI3BP   |
| 240890_at   | 10.63  | 8.46  |                                                                                     |          |
| 1552694_at  | 5.75   | 8.34  | solute carrier family 2 (facilitated<br>glucose transporter), member 13             | SLC2A13  |
| 214148_at   | 2.04   | 8.25  |                                                                                     |          |
| 232295_at   | 2.15   | 8.20  | G elongation factor, mitochondrial 1                                                | GFM1     |
| 206417_at   | 2.56   | 7.86  | cyclic nucleotide gated channel alpha<br>1                                          | CNGA1    |
| 243222_at   | 4.02   | 7.86  |                                                                                     |          |
| 220115_s_at | 5.54   | 7.66  | cadherin 10, type 2 (T2-cadherin)                                                   | CDH10    |
| 241420_at   | 2.23   | 7.52  |                                                                                     |          |
| 231260_at   | 4.34   | 7.49  |                                                                                     |          |
| 223735_at   | 6.14   | 7.46  | ADP-ribosylation factor-like 6                                                      | ARL6     |

|              |       |      |                                                                               |         |
|--------------|-------|------|-------------------------------------------------------------------------------|---------|
| 223557_s_at  | 7.08  | 7.25 | transmembrane protein with EGF-like and two follistatin-like domains 2        | TMEFF2  |
| 1552521_a_at | 3.68  | 7.24 | transmembrane protein 74                                                      | TMEM74  |
| 211182_x_at  | 5.54  | 7.24 | runt-related transcription factor 1 (acute myeloid leukemia 1; aml1 oncogene) | RUNX1   |
| 1554706_at   | 5.06  | 6.87 | olfactory receptor, family 2, subfamily L, member 13                          | OR2L13  |
| 238919_at    | 3.89  | 6.83 |                                                                               |         |
| 206463_s_at  | 13.19 | 6.70 | dehydrogenase/reductase (SDR family) member 2                                 | DHRS2   |
| 219148_at    | 7.04  | 6.53 | PDZ binding kinase                                                            | PBK     |
| 207517_at    | 12.90 | 6.51 | laminin, gamma 2                                                              | LAMC2   |
| 232549_at    | 4.14  | 6.42 | RNA binding motif protein 11                                                  | RBM11   |
| 1557765_at   | 4.12  | 6.31 |                                                                               |         |
| 223204_at    | 8.67  | 6.28 | chromosome 4 open reading frame 18                                            | C4orf18 |
| 206726_at    | 6.85  | 6.23 |                                                                               |         |
| 1558452_at   | 2.12  | 6.21 | transmembrane protein 144                                                     | TMEM144 |
| 220369_at    | 2.81  | 6.15 | SMEK homolog 1, suppressor of mek1 (Dictyostelium)                            | SMEK1   |
| 222376_at    | 5.98  | 6.15 |                                                                               |         |
| 1570119_at   | 2.08  | 6.07 | androgen-induced proliferation inhibitor                                      | APRIN   |
| 206331_at    | 6.98  | 5.95 | calcitonin receptor-like                                                      | CALCRL  |
| 241298_x_at  | 2.38  | 5.91 |                                                                               |         |
| 212624_s_at  | 7.14  | 5.86 | chimerin (chimaerin) 1                                                        | CHN1    |
| 204959_at    | 29.27 | 5.83 | myeloid cell nuclear differentiation antigen                                  | MNDA    |
| 206091_at    | 2.92  | 5.82 | matrilin 3                                                                    | MATN3   |
| 209841_s_at  | 9.04  | 5.77 | leucine rich repeat neuronal 3                                                | LRRN3   |
| 219738_s_at  | 6.19  | 5.76 | protocadherin 9                                                               | PCDH9   |
| 238756_at    | 5.11  | 5.74 |                                                                               |         |
| 240512_x_at  | 42.94 | 5.66 | potassium channel tetramerisation domain containing 4                         | KCTD4   |
| 229292_at    | 4.94  | 5.52 | erythrocyte membrane protein band 4.1 like 5                                  | EPB41L5 |
| 236278_at    | 2.02  | 5.44 |                                                                               |         |
| 203811_s_at  | 9.21  | 5.42 | DnaJ (Hsp40) homolog, subfamily B, member 4                                   | DNAJB4  |
| 1561113_at   | 3.74  | 5.39 |                                                                               |         |
| 208173_at    | 7.25  | 5.36 | interferon, beta 1, fibroblast                                                | IFNB1   |
| 230169_at    | 8.69  | 5.33 | THAP domain containing 6                                                      | THAP6   |
| 228946_at    | 3.83  | 5.28 | inturned planar cell polarity effector homolog (Drosophila)                   | INTU    |
| 235675_at    | 6.31  | 5.26 | dihydrofolate reductase-like 1                                                | DHFRL1  |
| 219274_at    | 6.73  | 5.24 | tetraspanin 12                                                                | TSPAN12 |
| 202668_at    | 4.44  | 5.24 | ephrin-B2                                                                     | EFNB2   |
| 210815_s_at  | 5.96  | 5.17 | calcitonin receptor-like                                                      | CALCRL  |
| 212224_at    | 5.69  | 5.16 | aldehyde dehydrogenase 1 family, member A1                                    | ALDH1A1 |

|              |        |      |                                                                    |          |
|--------------|--------|------|--------------------------------------------------------------------|----------|
| 222717_at    | 4.12   | 5.15 | serum deprivation response<br>(phosphatidylserine binding protein) | SDPR     |
| 219737_s_at  | 5.64   | 5.07 | protocadherin 9                                                    | PCDH9    |
| 206254_at    | 27.72  | 5.06 | epidermal growth factor (beta-<br>urogastrone)                     | EGF      |
| 214534_at    | 2.49   | 5.00 | histone cluster 1, H1b                                             | HIST1H1B |
| 243056_at    | 8.48   | 4.98 | chromosome 12 open reading frame<br>60                             | C12orf60 |
| 1568615_a_at | 7.99   | 4.96 |                                                                    |          |
| 232695_at    | 6.30   | 4.96 | kinesin family member 6                                            | KIF6     |
| 230506_at    | 9.57   | 4.94 | chromosome 6 open reading frame<br>164                             | C6orf164 |
| 229057_at    | 35.35  | 4.91 | sodium channel, voltage-gated, type<br>II, alpha subunit           | SCN2A    |
| 205046_at    | 4.34   | 4.87 | centromere protein E, 312kDa                                       | CENPE    |
| 213820_s_at  | 5.39   | 4.84 | START domain containing 5                                          | STARD5   |
| 234611_at    | 4.50   | 4.83 |                                                                    |          |
| 235846_at    | 4.41   | 4.82 |                                                                    |          |
| 205922_at    | 20.32  | 4.79 | vanin 2                                                            | VNN2     |
| 1567612_at   | 18.90  | 4.79 |                                                                    |          |
| 215228_at    | 5.53   | 4.77 | nescient helix loop helix 2                                        | NHLH2    |
| 229975_at    | 3.23   | 4.76 |                                                                    |          |
| 203998_s_at  | 3.75   | 4.75 | synaptotagmin I                                                    | SYT1     |
| 230147_at    | 9.76   | 4.74 | coagulation factor II (thrombin)<br>receptor-like 2                | F2RL2    |
| 206721_at    | 9.51   | 4.73 | chromosome 1 open reading frame<br>114                             | C1orf114 |
| 227839_at    | 15.17  | 4.71 | methyl-CpG binding domain protein<br>5                             | MBD5     |
| 238578_at    | 6.95   | 4.70 | transmembrane protein 182                                          | TMEM182  |
| 223838_at    | 15.06  | 4.69 | testis specific, 10                                                | TSGA10   |
| 235406_x_at  | 2.11   | 4.69 |                                                                    |          |
| 220623_s_at  | 12.24  | 4.68 | testis specific, 10                                                | TSGA10   |
| 226436_at    | 5.20   | 4.65 | Ras association (RalGDS/AF-6)<br>domain family 4                   | RASSF4   |
| 209211_at    | 3.44   | 4.65 | Kruppel-like factor 5 (intestinal)                                 | KLF5     |
| 228680_at    | 5.64   | 4.65 | kinesin family member 3A                                           | KIF3A    |
| 221805_at    | 116.46 | 4.60 | neurofilament, light polypeptide<br>68kDa                          | NEFL     |
| 231218_at    | 52.93  | 4.60 |                                                                    |          |
| 239975_at    | 2.24   | 4.60 |                                                                    |          |
| 240161_s_at  | 8.69   | 4.60 | cell division cycle 20 homolog B (S.<br>cerevisiae)                | CDC20B   |
| 203810_at    | 6.99   | 4.59 | DnaJ (Hsp40) homolog, subfamily B,<br>member 4                     | DNAJB4   |
| 206914_at    | 7.22   | 4.56 | cytotoxic and regulatory T cell<br>molecule                        | CRTAM    |
| 239556_at    | 2.10   | 4.53 |                                                                    |          |
| 212104_s_at  | 6.56   | 4.53 | RNA binding motif protein 9                                        | RBM9     |
| 207495_at    | 4.39   | 4.52 | RAB28, member RAS oncogene<br>family                               | RAB28    |
| 203549_s_at  | 2.03   | 4.49 | lipoprotein lipase                                                 | LPL      |

|              |       |      |                                                                                   |          |
|--------------|-------|------|-----------------------------------------------------------------------------------|----------|
| 213081_at    | 2.02  | 4.49 | zinc finger and BTB domain containing 22                                          | ZBTB22   |
| 201733_at    | 2.86  | 4.48 | chloride channel 3                                                                | CLCN3    |
| 206249_at    | 5.05  | 4.46 | mitogen-activated protein kinase kinase kinase 13                                 | MAP3K13  |
| 230450_at    | 4.86  | 4.41 |                                                                                   |          |
| 239043_at    | 6.75  | 4.40 | zinc finger protein 404                                                           | ZNF404   |
| 238228_at    | 6.41  | 4.40 | component of oligomeric golgi complex 3                                           | COG3     |
| 226103_at    | 7.22  | 4.39 | nexilin (F actin binding protein)                                                 | NEXN     |
| 209465_x_at  | 10.01 | 4.37 | pleiotrophin (heparin binding growth factor 8, neurite growth-promoting factor 1) | PTN      |
| 208121_s_at  | 6.51  | 4.36 | protein tyrosine phosphatase, receptor type, O                                    | PTPRO    |
| 1554524_a_at | 4.51  | 4.36 | olfactomedin 3                                                                    | OLFM3    |
| 239944_at    | 3.11  | 4.35 |                                                                                   |          |
| 237058_x_at  | 8.11  | 4.35 | solute carrier family 6 (neurotransmitter transporter, GABA), member 13           | SLC6A13  |
| 206512_at    | 2.15  | 4.33 | zinc finger (CCCH type), RNA-binding motif and serine/arginine rich 1             | ZRSR1    |
| 213418_at    | 2.37  | 4.33 | heat shock 70kDa protein 6 (HSP70B')                                              | HSPA6    |
| 221287_at    | 2.46  | 4.30 | ribonuclease L (2',5'-oligoadenylate synthetase-dependent)                        | RNASEL   |
| 227197_at    | 4.82  | 4.28 |                                                                                   |          |
| 220497_at    | 6.84  | 4.28 | zinc finger protein 214                                                           | ZNF214   |
| 1553954_at   | 3.09  | 4.27 | asparagine-linked glycosylation 14 homolog ( <i>S. cerevisiae</i> )               | ALG14    |
| 208484_at    | 12.23 | 4.26 | histone cluster 1, H1a                                                            | HIST1H1A |
| 206932_at    | 8.96  | 4.24 | cholesterol 25-hydroxylase                                                        | CH25H    |
| 204602_at    | 4.48  | 4.24 | dickkopf homolog 1 ( <i>Xenopus laevis</i> )                                      | DKK1     |
| 206291_at    | 9.68  | 4.22 | neurotensin                                                                       | NTS      |
| 225283_at    | 4.29  | 4.22 | arrestin domain containing 4                                                      | ARRDC4   |
| 244786_at    | 4.71  | 4.21 | small nucleolar RNA host gene (non-protein coding) 10                             | SNHG10   |
| 236076_at    | 3.31  | 4.20 |                                                                                   |          |
| 211538_s_at  | 11.98 | 4.20 | heat shock 70kDa protein 2                                                        | HSPA2    |
| 214073_at    | 11.46 | 4.19 | cortactin                                                                         | CTTN     |
| 229147_at    | 3.89  | 4.18 |                                                                                   |          |
| 236634_at    | 3.60  | 4.18 | chromosome 8 open reading frame 48                                                | C8orf48  |
| 231119_at    | 4.63  | 4.18 | replication factor C (activator 1) 3, 38kDa                                       | RFC3     |
| 209840_s_at  | 8.62  | 4.17 | leucine rich repeat neuronal 3                                                    | LRRN3    |
| 235461_at    | 2.53  | 4.17 | KIAA1546                                                                          | KIAA1546 |
| 230032_at    | 5.24  | 4.17 |                                                                                   |          |
| 1552427_at   | 2.84  | 4.16 | zinc finger protein 485                                                           | ZNF485   |
| 213623_at    | 4.57  | 4.09 | kinesin family member 3A                                                          | KIF3A    |

|              |       |      |                                                                                                    |           |
|--------------|-------|------|----------------------------------------------------------------------------------------------------|-----------|
| 230708_at    | 6.23  | 4.08 | prickle homolog 1 ( <i>Drosophila</i> )                                                            | PRICKLE1  |
| 1560258_a_at | 5.56  | 4.07 |                                                                                                    |           |
| 200974_at    | 6.35  | 4.04 | actin, alpha 2, smooth muscle, aorta                                                               | ACTA2     |
| 232125_at    | 4.77  | 4.04 |                                                                                                    |           |
| 230789_at    | 4.28  | 4.02 | suppressor of hairy wing homolog 2 ( <i>Drosophila</i> )                                           | SUHW2     |
| 1568627_at   | 4.06  | 4.00 | SMEK homolog 2, suppressor of mek1 ( <i>Dictyostelium</i> )                                        | SMEK2     |
| 226341_at    | 3.75  | 4.00 |                                                                                                    |           |
| 244734_at    | 8.99  | 4.00 |                                                                                                    |           |
| 238488_at    | 6.84  | 3.99 | importin 11                                                                                        | IPO11     |
| 1559322_at   | 6.99  | 3.96 |                                                                                                    |           |
| 210387_at    | 4.25  | 3.96 | histone cluster 1, H2bg                                                                            | HIST1H2BG |
| 232071_at    | 3.42  | 3.95 | chromosome 2 open reading frame 3                                                                  | C2orf3    |
| 230626_at    | 2.35  | 3.95 | tetraspanin 12                                                                                     | TSPAN12   |
| 242178_at    | 5.18  | 3.94 | lipase, member I                                                                                   | LIPI      |
| 231249_at    | 2.17  | 3.94 |                                                                                                    |           |
| 244404_at    | 4.09  | 3.94 |                                                                                                    |           |
| 1569607_s_at | 4.87  | 3.93 |                                                                                                    |           |
| 37547_at     | 3.61  | 3.93 | Bardet-Biedl syndrome 9                                                                            | BBS9      |
| 229989_at    | 2.62  | 3.91 | asparagine-linked glycosylation 9 homolog ( <i>S. cerevisiae</i> , alpha- 1,2-mannosyltransferase) | ALG9      |
| 244086_at    | 2.11  | 3.90 | arylacetamide deacetylase-like 1                                                                   | AADACL1   |
| 239825_at    | 11.53 | 3.90 | activating transcription factor 6                                                                  | ATF6      |
| 1555112_a_at | 8.88  | 3.90 | chromosome 1 open reading frame 114                                                                | C1orf114  |
| 213558_at    | 4.89  | 3.90 | piccolo (presynaptic cytomatrix protein)                                                           | PCLO      |
| 1560017_at   | 3.25  | 3.89 | transmembrane and tetratricopeptide repeat containing 3                                            | TMTC3     |
| 209189_at    | 2.16  | 3.86 | v-fos FBJ murine osteosarcoma viral oncogene homolog                                               | FOS       |
| 242206_at    | 2.70  | 3.85 |                                                                                                    |           |
| 205352_at    | 6.82  | 3.84 | serpin peptidase inhibitor, clade I (neuroserpin), member 1                                        | SERPINI1  |
| 218711_s_at  | 2.99  | 3.84 | serum deprivation response (phosphatidylserine binding protein)                                    | SDPR      |
| 243087_at    | 2.67  | 3.84 | WD repeat domain 63                                                                                | WDR63     |
| 244006_at    | 2.81  | 3.83 |                                                                                                    |           |
| 216350_s_at  | 3.67  | 3.81 | zinc finger protein 10                                                                             | ZNF10     |
| 223558_at    | 2.48  | 3.80 |                                                                                                    |           |
| 218769_s_at  | 5.35  | 3.79 | ankyrin repeat, family A (RFXANK-like), 2                                                          | ANKRA2    |
| 226733_at    | 4.42  | 3.78 | 6-phosphofructo-2-kinase/fructose-2,6-biphosphatase 2                                              | PFKFB2    |
| 235154_at    | 4.72  | 3.77 | TAF3 RNA polymerase II, TATA box binding protein (TBP)-associated factor, 140kDa                   | TAF3      |
| 226390_at    | 3.38  | 3.76 | START domain containing 4, sterol regulated                                                        | STARD4    |
| 1569403_at   | 5.58  | 3.76 |                                                                                                    |           |
| 223879_s_at  | 4.55  | 3.74 | oxidation resistance 1                                                                             | OXR1      |

|              |        |      |                                                                                  |          |
|--------------|--------|------|----------------------------------------------------------------------------------|----------|
| 1552309_a_at | 5.14   | 3.72 | nexilin (F actin binding protein)                                                | NEXN     |
| 1553710_at   | 2.08   | 3.71 |                                                                                  |          |
| 223854_at    | 3.86   | 3.71 | protocadherin beta 10                                                            | PCDHB10  |
| 208498_s_at  | 6.41   | 3.70 | amylase, alpha 1A; salivary                                                      | AMY1A    |
| 239363_at    | 3.31   | 3.68 |                                                                                  |          |
| 216344_at    | 8.60   | 3.67 | nephronophthisis 4                                                               | NPHP4    |
| 217678_at    | 4.69   | 3.67 | solute carrier family 7, (cationic amino acid transporter, y+ system) member 11  | SLC7A11  |
| 1562259_at   | 2.32   | 3.67 | testis expressed sequence 9                                                      | TEX9     |
| 240436_at    | 4.58   | 3.67 |                                                                                  |          |
| 235885_at    | 321.56 | 3.65 |                                                                                  |          |
| 232238_at    | 3.19   | 3.64 | asp (abnormal spindle) homolog, microcephaly associated (Drosophila)             | ASPM     |
| 226528_at    | 4.58   | 3.64 | metaxin 3                                                                        | MTX3     |
| 209921_at    | 3.27   | 3.62 | solute carrier family 7, (cationic amino acid transporter, y+ system) member 11  | SLC7A11  |
| 235447_at    | 2.27   | 3.62 | TruB pseudouridine (psi) synthase homolog 1 (E. coli)                            | TRUB1    |
| 210821_x_at  | 3.23   | 3.61 | centromere protein A                                                             | CENPA    |
| 243352_at    | 3.51   | 3.59 | alpha-kinase 1                                                                   | ALPK1    |
| 215796_at    | 10.40  | 3.59 | T cell receptor alpha locus                                                      | TRA@     |
| 244165_at    | 3.72   | 3.59 | chromosome 10 open reading frame 18                                              | C10orf18 |
| 231055_at    | 2.48   | 3.59 |                                                                                  |          |
| 235512_at    | 2.09   | 3.58 | cyclin-dependent kinase-like 1 (CDC2-related kinase)                             | CDKL1    |
| 219361_s_at  | 5.01   | 3.58 | interferon stimulated exonuclease gene 20kDa-like 1                              | ISG20L1  |
| 224448_s_at  | 2.14   | 3.57 | chromosome 6 open reading frame 125                                              | C6orf125 |
| 241703_at    | 3.41   | 3.56 |                                                                                  |          |
| 205698_s_at  | 8.95   | 3.55 | mitogen-activated protein kinase kinase 6                                        | MAP2K6   |
| 203413_at    | 21.12  | 3.52 | NEL-like 2 (chicken)                                                             | NELL2    |
| 1568807_a_at | 6.85   | 3.51 |                                                                                  |          |
| 237065_s_at  | 2.40   | 3.51 |                                                                                  |          |
| 226966_at    | 5.68   | 3.51 | PRP40 pre-mRNA processing factor 40 homolog B (S. cerevisiae)                    | PRPF40B  |
| 201150_s_at  | 3.04   | 3.50 | TIMP metalloproteinase inhibitor 3 (Sorsby fundus dystrophy, pseudoinflammatory) | TIMP3    |
| 244571_s_at  | 7.48   | 3.50 | tetratricopeptide repeat domain 12                                               | TTC12    |
| 229360_at    | 7.79   | 3.48 | suppressor of hairy wing homolog 2 (Drosophila)                                  | SUHW2    |
| 238720_at    | 11.02  | 3.48 | oligodendrocyte myelin glycoprotein                                              | OMG      |
| 244634_at    | 2.81   | 3.45 | family with sequence similarity 53, member B                                     | FAM53B   |
| 1552705_at   | 4.75   | 3.45 | dual specificity phosphatase 19                                                  | DUSP19   |
| 238962_at    | 4.80   | 3.45 |                                                                                  |          |

|              |       |      |                                                                                  |           |
|--------------|-------|------|----------------------------------------------------------------------------------|-----------|
| 231513_at    | 4.15  | 3.44 | potassium inwardly-rectifying channel, subfamily J, member 2                     | KCNJ2     |
| 235764_at    | 4.59  | 3.44 |                                                                                  |           |
| 234628_at    | 4.46  | 3.42 |                                                                                  |           |
| 239002_at    | 4.91  | 3.41 | asp (abnormal spindle) homolog, microcephaly associated (Drosophila)             | ASPM      |
| 228158_at    | 3.18  | 3.41 |                                                                                  |           |
| 227306_at    | 4.26  | 3.39 |                                                                                  |           |
| 1554242_a_at | 2.81  | 3.39 | coagulation factor C homolog, cochlin (Limulus polyphemus)                       | COCH      |
| 241399_at    | 6.17  | 3.39 | family with sequence similarity 19 (chemokine (C-C motif)-like), member A2       | FAM19A2   |
| 244424_at    | 4.37  | 3.39 |                                                                                  |           |
| 1569147_at   | 4.61  | 3.38 |                                                                                  |           |
| 233876_at    | 8.18  | 3.38 |                                                                                  |           |
| 232778_at    | 2.67  | 3.37 |                                                                                  |           |
| 214117_s_at  | 2.06  | 3.37 | biotinidase                                                                      | BTD       |
| 227332_at    | 3.52  | 3.36 |                                                                                  |           |
| 225420_at    | 4.51  | 3.35 | glycerol-3-phosphate acyltransferase, mitochondrial                              | GPAM      |
| 241541_at    | 4.16  | 3.35 | mindbomb homolog 2 (Drosophila)                                                  | MIB2      |
| 219793_at    | 3.37  | 3.34 | sorting nexin 16                                                                 | SNX16     |
| 210852_s_at  | 3.32  | 3.34 | aminoadipate-semialdehyde synthase                                               | AASS      |
| 205433_at    | 3.89  | 3.33 | butyrylcholinesterase                                                            | BCHE      |
| 1570048_at   | 4.04  | 3.32 | DPH4, JJJ3 homolog (S. cerevisiae)                                               | DPH4      |
| 1557283_a_at | 3.43  | 3.32 | zinc finger protein 519                                                          | ZNF519    |
| 1560924_at   | 3.30  | 3.30 |                                                                                  |           |
| 1563460_at   | 11.41 | 3.29 |                                                                                  |           |
| 1569816_at   | 2.55  | 3.29 |                                                                                  |           |
| 229072_at    | 4.36  | 3.28 |                                                                                  |           |
| 1554966_a_at | 2.34  | 3.28 | filamin A interacting protein 1-like                                             | FILIP1L   |
| 231822_at    | 2.31  | 3.27 | CTTNBP2 N-terminal like                                                          | CTTNBP2NL |
| 239896_at    | 2.38  | 3.26 |                                                                                  |           |
| 214748_at    | 2.03  | 3.26 |                                                                                  |           |
| 213929_at    | 5.69  | 3.26 |                                                                                  |           |
| 232829_at    | 6.78  | 3.25 | olfactory receptor, family 52, subfamily K, member 3 pseudogene                  | OR52K3P   |
| 205514_at    | 5.14  | 3.25 | zinc finger protein 415                                                          | ZNF415    |
| 238126_at    | 16.62 | 3.24 |                                                                                  |           |
| 220351_at    | 3.83  | 3.24 | chemokine (C-C motif) receptor-like 1                                            | CCRL1     |
| 222262_s_at  | 3.11  | 3.24 | ethanolamine kinase 1                                                            | ETNK1     |
| 1560814_a_at | 4.15  | 3.23 | coiled-coil domain containing 32                                                 | CCDC32    |
| 235119_at    | 3.48  | 3.22 | TAF3 RNA polymerase II, TATA box binding protein (TBP)-associated factor, 140kDa | TAF3      |
| 220353_at    | 2.09  | 3.21 | family with sequence similarity 86, member C                                     | FAM86C    |
| 242247_at    | 6.88  | 3.21 | methyltransferase 5 domain containing 1                                          | METT5D1   |
| 236550_s_at  | 3.43  | 3.21 | zinc finger protein 311                                                          | ZNF311    |



|              |       |      |                                                                        |          |
|--------------|-------|------|------------------------------------------------------------------------|----------|
| 226339_at    | 3.62  | 3.20 | TruB pseudouridine (psi) synthase homolog 1 (E. coli)                  | TRUB1    |
| 219544_at    | 3.22  | 3.20 | chromosome 13 open reading frame 34                                    | C13orf34 |
| 209433_s_at  | 2.51  | 3.19 | phosphoribosyl pyrophosphate amidotransferase                          | PPAT     |
| 207729_at    | 23.89 | 3.17 | cadherin 9, type 2 (T1-cadherin)                                       | CDH9     |
| 240974_at    | 2.46  | 3.17 |                                                                        |          |
| 216748_at    | 4.37  | 3.17 | pyrin and HIN domain family, member 1                                  | PYHIN1   |
| 236174_at    | 2.52  | 3.17 |                                                                        |          |
| 232063_x_at  | 3.84  | 3.16 | phenylalanine-tRNA synthetase-like, beta subunit                       | FARSLB   |
| 227082_at    | 2.85  | 3.16 |                                                                        |          |
| 214169_at    | 4.29  | 3.16 | unc-84 homolog A (C. elegans)                                          | UNC84A   |
| 223691_at    | 4.03  | 3.16 | regulator of G-protein signalling 22                                   | RGS22    |
| 244557_at    | 2.40  | 3.16 |                                                                        |          |
| 1554963_at   | 3.66  | 3.16 | chromosome 6 open reading frame 192                                    | C6orf192 |
| 225462_at    | 3.21  | 3.15 | transmembrane protein 128                                              | TMEM128  |
| 207115_x_at  | 3.06  | 3.14 | mbt domain containing 1                                                | MBTD1    |
| 213853_at    | 3.05  | 3.14 | DPH4, JJJ3 homolog (S. cerevisiae)                                     | DPH4     |
| 209693_at    | 16.28 | 3.14 | astrotactin 2                                                          | ASTN2    |
| 242872_at    | 3.08  | 3.14 | citron (rho-interacting, serine/threonine kinase 21)                   | CIT      |
| 204712_at    | 2.63  | 3.14 | WNT inhibitory factor 1                                                | WIF1     |
| 238757_at    | 3.04  | 3.13 | DBF4 homolog B (S. cerevisiae)                                         | DBF4B    |
| 219773_at    | 31.68 | 3.13 | NADPH oxidase 4                                                        | NOX4     |
| 235737_at    | 2.92  | 3.13 |                                                                        |          |
| 239025_at    | 2.61  | 3.13 |                                                                        |          |
| 227786_at    | 3.79  | 3.12 | thyroid hormone receptor associated protein 6                          | THRAP6   |
| 236300_at    | 14.87 | 3.11 |                                                                        |          |
| 235102_x_at  | 2.01  | 3.11 | GRB2-related adaptor protein                                           | GRAP     |
| 204940_at    | 46.43 | 3.11 | phospholamban                                                          | PLN      |
| 236862_at    | 4.40  | 3.11 | golgi associated PDZ and coiled-coil motif containing                  | GOPC     |
| 223582_at    | 3.27  | 3.11 | G protein-coupled receptor 98                                          | GPR98    |
| 203304_at    | 4.44  | 3.10 | BMP and activin membrane-bound inhibitor homolog (Xenopus laevis)      | BAMBI    |
| 204290_s_at  | 3.04  | 3.10 | aldehyde dehydrogenase 6 family, member A1                             | ALDH6A1  |
| 224802_at    | 3.47  | 3.08 | Nedd4 family interacting protein 2                                     | NDFIP2   |
| 221988_at    | 2.74  | 3.08 | cofactor required for Sp1 transcriptional activation, subunit 7, 70kDa | CRSP7    |
| 1556123_a_at | 6.69  | 3.08 |                                                                        |          |
| 204962_s_at  | 3.57  | 3.07 | centromere protein A                                                   | CENPA    |
| 238466_at    | 3.31  | 3.07 |                                                                        |          |
| 117_at       | 3.37  | 3.07 |                                                                        |          |
| 202609_at    | 2.39  | 3.07 | epidermal growth factor receptor pathway substrate 8                   | EPS8     |
| 1557132_at   | 4.36  | 3.07 | WD repeat domain 17                                                    | WDR17    |

|              |      |      |                                                                                  |           |
|--------------|------|------|----------------------------------------------------------------------------------|-----------|
| 242996_at    | 2.19 | 3.07 | mitochondrial translational release factor 1                                     | MTRF1     |
| 218647_s_at  | 4.01 | 3.06 | yrdC domain containing (E. coli)                                                 | YRDC      |
| 223672_at    | 4.14 | 3.06 | SH3-domain GRB2-like (endophilin) interacting protein 1                          | SGIP1     |
| 206263_at    | 3.60 | 3.05 | flavin containing monooxygenase 4                                                | FMO4      |
| 223680_at    | 2.44 | 3.05 | zinc finger protein 607                                                          | ZNF607    |
| 227765_at    | 3.82 | 3.05 |                                                                                  |           |
| 1554742_at   | 3.01 | 3.05 | PMS1 postmeiotic segregation increased 1 (S. cerevisiae)                         | PMS1      |
| 237563_s_at  | 4.17 | 3.04 |                                                                                  |           |
| 1561125_at   | 9.97 | 3.04 | methylenetetrahydrofolate dehydrogenase (NADP+ dependent) 1-like                 | MTHFD1L   |
| 1552430_at   | 3.12 | 3.04 | WD repeat domain 17                                                              | WDR17     |
| 240239_at    | 2.25 | 3.04 | zinc finger protein 566                                                          | ZNF566    |
| 1552365_at   | 5.25 | 3.03 | scinderin                                                                        | SCIN      |
| 227628_at    | 2.83 | 3.03 |                                                                                  |           |
| 1552971_at   | 5.43 | 3.02 | sarcoglycan zeta                                                                 | SGCZ      |
| 226301_at    | 4.16 | 3.02 | chromosome 6 open reading frame 192                                              | C6orf192  |
| 228967_at    | 2.26 | 3.02 |                                                                                  |           |
| 209463_s_at  | 3.02 | 3.02 | TAF12 RNA polymerase II, TATA box binding protein (TBP)-associated factor, 20kDa | TAF12     |
| 1569385_s_at | 3.06 | 3.02 | KIAA1546                                                                         | KIAA1546  |
| 232737_s_at  | 2.97 | 3.02 | olfactory receptor, family 2, subfamily A, member 4                              | OR2A4     |
| 234405_s_at  | 2.07 | 3.02 | RNA U, small nuclear RNA export adaptor (phosphorylation regulated)              | RNUXA     |
| 206271_at    | 4.65 | 3.02 | toll-like receptor 3                                                             | TLR3      |
| 212806_at    | 2.08 | 3.00 |                                                                                  |           |
| 1560020_at   | 3.53 | 2.99 | DnaJ (Hsp40) homolog, subfamily C, member 13                                     | DNAJC13   |
| 225687_at    | 4.51 | 2.99 | family with sequence similarity 83, member D                                     | FAM83D    |
| 213218_at    | 2.21 | 2.99 | zinc finger protein 187                                                          | ZNF187    |
| 235608_at    | 3.94 | 2.99 |                                                                                  |           |
| 241905_at    | 2.76 | 2.99 | phosphoinositide-3-kinase, class 2, alpha polypeptide                            | PIK3C2A   |
| 207808_s_at  | 2.82 | 2.99 | protein S (alpha)                                                                | PROS1     |
| 1557430_at   | 2.37 | 2.99 |                                                                                  |           |
| 232985_s_at  | 3.59 | 2.99 | developmental pluripotency associated 4                                          | DPPA4     |
| 219078_at    | 2.61 | 2.98 | G patch domain containing 2                                                      | GPATCH2   |
| 218940_at    | 2.97 | 2.98 | chromosome 14 open reading frame 138                                             | C14orf138 |
| 1558856_at   | 2.38 | 2.98 | DMRT-like family A2                                                              | DMRTA2    |
| 218597_s_at  | 2.55 | 2.98 | zinc finger, CDGSH-type domain 1                                                 | ZCD1      |
| 231947_at    | 4.22 | 2.97 | myc target 1                                                                     | MYCT1     |
| 240141_at    | 2.25 | 2.96 | PAP associated domain containing 4                                               | PAPD4     |
| 206314_at    | 3.03 | 2.96 | zinc finger protein 167                                                          | ZNF167    |

|              |       |      |                                                                                          |          |
|--------------|-------|------|------------------------------------------------------------------------------------------|----------|
| 209310_s_at  | 3.47  | 2.96 | caspase 4, apoptosis-related cysteine peptidase                                          | CASP4    |
| 1559902_at   | 2.13  | 2.95 | megakaryoblastic leukemia (translocation) 1                                              | MKL1     |
| 235320_at    | 5.83  | 2.95 | ADP-ribosylation factor-like 6                                                           | ARL6     |
| 232146_at    | 5.94  | 2.95 | NADH dehydrogenase (ubiquinone) 1, subcomplex unknown, 1, 6kDa                           | NDUFC1   |
| 230539_at    | 4.91  | 2.95 |                                                                                          |          |
| 235158_at    | 2.74  | 2.95 |                                                                                          |          |
| 1570125_at   | 2.17  | 2.94 |                                                                                          |          |
| 220549_at    | 2.96  | 2.94 | RAD54 homolog B ( <i>S. cerevisiae</i> )                                                 | RAD54B   |
| 228996_at    | 3.30  | 2.94 | ring finger and CCCH-type zinc finger domains 1                                          | RC3H1    |
| 220047_at    | 5.16  | 2.94 | sirtuin (silent mating type information regulation 2 homolog) 4 ( <i>S. cerevisiae</i> ) | SIRT4    |
| 242470_at    | 3.75  | 2.94 | EP300 interacting inhibitor of differentiation 2B                                        | EID2B    |
| 201667_at    | 4.37  | 2.93 | gap junction protein, alpha 1, 43kDa                                                     | GJA1     |
| 206497_at    | 2.25  | 2.93 | chromosome 7 open reading frame 44                                                       | C7orf44  |
| 223373_s_at  | 2.87  | 2.93 | phospholipase A2, group XIIA SAM domain, SH3 domain and nuclear localization signals 1   | PLA2G12A |
| 1569599_at   | 6.57  | 2.93 |                                                                                          | SAMSN1   |
| 1558391_s_at | 4.29  | 2.93 | zinc finger protein 599                                                                  | ZNF599   |
| 227963_at    | 4.50  | 2.92 |                                                                                          |          |
| 1564053_a_at | 2.31  | 2.92 | YTH domain family, member 3                                                              | YTHDF3   |
| 222798_at    | 2.75  | 2.92 | phosphotriesterase related                                                               | PTER     |
| 230431_at    | 2.76  | 2.92 |                                                                                          |          |
| 231789_at    | 2.58  | 2.92 | protocadherin beta 15                                                                    | PCDHB15  |
| 207817_at    | 32.66 | 2.92 | interferon, omega 1                                                                      | IFNW1    |
| 217127_at    | 3.08  | 2.92 | cystathionase (cystathionine gamma-lyase)                                                | CTH      |
| 225689_at    | 2.99  | 2.91 | chromosome 3 open reading frame 39                                                       | C3orf39  |
| 1554743_x_at | 2.13  | 2.91 | PMS1 postmeiotic segregation increased 1 ( <i>S. cerevisiae</i> )                        | PMS1     |
| 232787_at    | 2.38  | 2.91 |                                                                                          |          |
| 203725_at    | 2.21  | 2.91 | growth arrest and DNA-damage-inducible, alpha                                            | GADD45A  |
| 220169_at    | 3.63  | 2.90 | transmembrane protein 156                                                                | TMEM156  |
| 205938_at    | 2.43  | 2.90 | protein phosphatase 1E (PP2C domain containing)                                          | PPM1E    |
| 227214_at    | 3.13  | 2.90 | golgi associated PDZ and coiled-coil motif containing                                    | GOPC     |
| 209967_s_at  | 2.90  | 2.90 | cAMP responsive element modulator                                                        | CREM     |
| 235425_at    | 2.08  | 2.89 | shugoshin-like 2 ( <i>S. pombe</i> )                                                     | SGOL2    |
| 217536_x_at  | 2.26  | 2.88 |                                                                                          |          |
| 238935_at    | 3.25  | 2.88 | ribosomal protein S27-like                                                               | RPS27L   |
| 1554741_s_at | 2.50  | 2.88 |                                                                                          |          |
| 206026_s_at  | 2.95  | 2.88 | tumor necrosis factor, alpha-induced protein 6                                           | TNFAIP6  |

|              |      |      |                                                                          |          |
|--------------|------|------|--------------------------------------------------------------------------|----------|
| 207505_at    | 2.51 | 2.88 | protein kinase, cGMP-dependent, type II                                  | PRKG2    |
| 222351_at    | 3.13 | 2.88 | protein phosphatase 2 (formerly 2A), regulatory subunit A, beta isoform  | PPP2R1B  |
| 240065_at    | 4.35 | 2.88 | family with sequence similarity 81, member B                             | FAM81B   |
| 227289_at    | 2.50 | 2.87 | protocadherin 17                                                         | PCDH17   |
| 235134_at    | 2.86 | 2.87 |                                                                          |          |
| 242409_at    | 3.15 | 2.87 |                                                                          |          |
| 1553269_at   | 2.43 | 2.87 | zinc finger protein 718                                                  | ZNF718   |
| 209146_at    | 3.03 | 2.87 | sterol-C4-methyl oxidase-like                                            | SC4MOL   |
| 212720_at    | 3.11 | 2.86 | poly(A) polymerase alpha                                                 | PAPOLA   |
| 244743_x_at  | 2.05 | 2.86 | zinc finger protein 138                                                  | ZNF138   |
| 203502_at    | 2.86 | 2.86 | 2,3-bisphosphoglycerate mutase                                           | BPGM     |
| 229285_at    | 3.48 | 2.85 | ribonuclease L (2',5'-oligoadenylate synthetase-dependent)               | RNASEL   |
| 204159_at    | 2.90 | 2.85 | cyclin-dependent kinase inhibitor 2C (p18, inhibits CDK4)                | CDKN2C   |
| 1554418_s_at | 3.09 | 2.85 | sparc/osteonectin, cwcv and kazal-like domains proteoglycan (testican) 3 | SPOCK3   |
| 209595_at    | 2.16 | 2.84 | general transcription factor IIF, polypeptide 2, 30kDa                   | GTF2F2   |
| 225851_at    | 2.65 | 2.84 | farnesyltransferase, CAAX box, beta                                      | FNTB     |
| 221291_at    | 2.24 | 2.84 | UL16 binding protein 2                                                   | ULBP2    |
| 231976_at    | 2.36 | 2.83 | lines homolog 1 (Drosophila)                                             | LINS1    |
| 228941_at    | 3.19 | 2.83 |                                                                          |          |
| 233677_at    | 2.78 | 2.83 |                                                                          |          |
| 235866_at    | 2.20 | 2.83 |                                                                          |          |
| 203377_s_at  | 4.81 | 2.82 | cell division cycle 40 homolog (S. cerevisiae)                           | CDC40    |
| 213805_at    | 2.24 | 2.82 |                                                                          |          |
| 238504_at    | 3.51 | 2.81 | chromosome 6 open reading frame 57                                       | C6orf57  |
| 215342_s_at  | 4.02 | 2.81 | RAB GTPase activating protein 1-like                                     | RABGAP1L |
| 222939_s_at  | 3.22 | 2.81 | solute carrier family 16, member 10 (aromatic amino acid transporter)    | SLC16A10 |
| 241823_at    | 6.42 | 2.80 |                                                                          |          |
| 226600_at    | 2.58 | 2.80 | transmembrane and tetratricopeptide repeat containing 3                  | TMTC3    |
| 237681_at    | 5.46 | 2.79 |                                                                          |          |
| 235343_at    | 2.38 | 2.79 |                                                                          |          |
| 204523_at    | 2.15 | 2.78 | zinc finger protein 140                                                  | ZNF140   |
| 237168_at    | 2.69 | 2.78 |                                                                          |          |
| 244049_at    | 2.52 | 2.78 |                                                                          |          |
| 220145_at    | 5.05 | 2.78 | microtubule-associated protein 9                                         | MAP9     |
| 243815_at    | 2.12 | 2.77 | piggyBac transposable element derived 4                                  | PGBD4    |
| 242819_at    | 2.37 | 2.77 | BET1 homolog (S. cerevisiae)                                             | BET1     |
| 215307_at    | 3.08 | 2.77 | zinc finger protein 529                                                  | ZNF529   |
| 204807_at    | 3.07 | 2.76 | transmembrane protein 5                                                  | TMEM5    |

|              |      |      |                                                                                |           |
|--------------|------|------|--------------------------------------------------------------------------------|-----------|
| 234295_at    | 3.48 | 2.76 | debranching enzyme homolog 1 ( <i>S. cerevisiae</i> )                          | DBR1      |
| 227546_x_at  | 3.39 | 2.76 | cyclin L2                                                                      | CCNL2     |
| 231269_at    | 4.10 | 2.76 | activating signal cointegrator 1 complex subunit 3                             | ASCC3     |
| 235117_at    | 2.17 | 2.75 | ChaC, cation transport regulator homolog 2 ( <i>E. coli</i> )                  | CHAC2     |
| 219003_s_at  | 4.08 | 2.75 | mannosidase, endo-alpha                                                        | MANEA     |
| 213032_at    | 3.37 | 2.75 |                                                                                |           |
| 225424_at    | 3.43 | 2.75 | glycerol-3-phosphate acyltransferase, mitochondrial                            | GPAM      |
| 243512_x_at  | 2.79 | 2.74 | IMP2 inner mitochondrial membrane peptidase-like ( <i>S. cerevisiae</i> )      | IMMP2L    |
| 204135_at    | 3.01 | 2.74 | filamin A interacting protein 1-like                                           | FILIP1L   |
| 235064_s_at  | 2.13 | 2.73 | chromosome 20 open reading frame 196                                           | C20orf196 |
| 235528_at    | 4.66 | 2.73 | guanylate cyclase activator 1B (retina)                                        | GUCA1B    |
| 223412_at    | 3.71 | 2.73 | kelch repeat and BTB (POZ) domain containing 7                                 | KBTBD7    |
| 242557_at    | 4.98 | 2.73 | chromosome 6 open reading frame 12                                             | C6orf12   |
| 203889_at    | 6.39 | 2.73 | secretogranin V (7B2 protein)                                                  | SCG5      |
| 219947_at    | 3.54 | 2.73 | C-type lectin domain family 4, member A                                        | CLEC4A    |
| 207103_at    | 4.19 | 2.73 | potassium voltage-gated channel, Shal-related subfamily, member 2              | KCND2     |
| 242255_at    | 4.01 | 2.72 | WD repeat domain 37                                                            | WDR37     |
| 204167_at    | 3.90 | 2.72 | biotinidase                                                                    | BTD       |
| 218954_s_at  | 2.17 | 2.72 | BRF2, subunit of RNA polymerase III transcription initiation factor, BRF1-like | BRF2      |
| 213424_at    | 2.60 | 2.71 |                                                                                |           |
| 239710_at    | 5.72 | 2.71 |                                                                                |           |
| 1554547_at   | 2.71 | 2.71 | family with sequence similarity 13, member C1                                  | FAM13C1   |
| 1556062_at   | 2.22 | 2.70 | ribonuclease P/MRP 30kDa subunit                                               | RPP30     |
| 233840_at    | 2.37 | 2.70 |                                                                                |           |
| 1553122_s_at | 3.00 | 2.70 | RB-associated KRAB zinc finger                                                 | RBAK      |
| 223229_at    | 2.14 | 2.70 | ubiquitin-conjugating enzyme E2T (putative)                                    | UBE2T     |
| 227176_at    | 3.86 | 2.70 | solute carrier family 2 (facilitated glucose transporter), member 13           | SLC2A13   |
| 206648_at    | 4.53 | 2.69 | zinc finger protein 571                                                        | ZNF571    |
| 232481_s_at  | 2.48 | 2.69 | SLIT and NTRK-like family, member 6                                            | SLITRK6   |
| 45653_at     | 2.19 | 2.69 | potassium channel tetramerisation domain containing 13                         | KCTD13    |
| 203762_s_at  | 2.25 | 2.69 | dynein, cytoplasmic 2, light intermediate chain 1                              | DYNC2LI1  |
| 201791_s_at  | 4.34 | 2.69 | 7-dehydrocholesterol reductase                                                 | DHCR7     |
| 238475_at    | 2.16 | 2.68 |                                                                                |           |
| 230351_at    | 2.60 | 2.68 |                                                                                |           |

|              |       |      |                                                                                                      |           |
|--------------|-------|------|------------------------------------------------------------------------------------------------------|-----------|
| 202058_s_at  | 2.37  | 2.68 | karyopherin alpha 1 (importin alpha 5)                                                               | KPNA1     |
| 226945_at    | 2.40  | 2.68 | rhomboid domain containing 1                                                                         | RHBDD1    |
| 230083_at    | 2.19  | 2.67 |                                                                                                      |           |
| 203478_at    | 3.03  | 2.67 | NADH dehydrogenase (ubiquinone) 1, subcomplex unknown, 1, 6kDa                                       | NDUFC1    |
| 233852_at    | 2.11  | 2.67 | polymerase (DNA directed), eta                                                                       | POLH      |
| 229107_at    | 2.08  | 2.67 |                                                                                                      |           |
| 205443_at    | 3.07  | 2.67 | small nuclear RNA activating complex, polypeptide 1, 43kDa                                           | SNAPC1    |
| 1569251_a_at | 2.29  | 2.67 | zinc finger protein 333                                                                              | ZNF333    |
| 222573_s_at  | 2.04  | 2.66 | salvador homolog 1 (Drosophila)                                                                      | SAV1      |
| 228655_at    | 2.23  | 2.66 |                                                                                                      |           |
| 222857_s_at  | 3.58  | 2.66 | potassium large conductance calcium-activated channel, subfamily M, beta member 4                    | KCNMB4    |
| 236958_at    | 2.70  | 2.65 |                                                                                                      |           |
| 228660_x_at  | 3.91  | 2.65 | sema domain, immunoglobulin domain (Ig), transmembrane domain (TM) and short cytoplasmic domain, (se | SEMA4F    |
| 208375_at    | 11.09 | 2.65 | interferon, alpha 1                                                                                  | IFNA1     |
| 1568720_at   | 2.94  | 2.65 | zinc finger protein 506                                                                              | ZNF506    |
| 220631_at    | 6.28  | 2.65 | O-sialoglycoprotein endopeptidase-like 1                                                             | OSGEPL1   |
| 1558809_s_at | 3.02  | 2.65 |                                                                                                      |           |
| 227941_at    | 3.00  | 2.65 |                                                                                                      |           |
| 1552370_at   | 2.18  | 2.64 | chromosome 4 open reading frame 33                                                                   | C4orf33   |
| 1563512_at   | 5.07  | 2.64 | nitric oxide synthase 1 (neuronal) adaptor protein                                                   | NOS1AP    |
| 1558501_at   | 6.44  | 2.64 | dynammin 3                                                                                           | DNM3      |
| 240230_s_at  | 2.12  | 2.64 |                                                                                                      |           |
| 1553192_at   | 2.00  | 2.64 | zinc finger protein 441                                                                              | ZNF441    |
| 1556209_at   | 3.15  | 2.64 | C-type lectin domain family 2, member B                                                              | CLEC2B    |
| 223397_s_at  | 2.24  | 2.63 | nuclear import 7 homolog (S. cerevisiae)                                                             | NIP7      |
| 1556122_at   | 4.09  | 2.63 |                                                                                                      |           |
| 225578_at    | 3.63  | 2.63 |                                                                                                      |           |
| 1568787_at   | 3.58  | 2.63 |                                                                                                      |           |
| 242667_at    | 3.12  | 2.63 |                                                                                                      |           |
| 1553983_at   | 2.28  | 2.62 |                                                                                                      |           |
| 202973_x_at  | 3.23  | 2.62 | family with sequence similarity 13, member A1                                                        | FAM13A1   |
| 229220_x_at  | 2.37  | 2.62 | nucleolar protein with MIF4G domain 1                                                                | NOM1      |
| 207528_s_at  | 2.17  | 2.61 | solute carrier family 7, (cationic amino acid transporter, y <sup>+</sup> system) member 11          | SLC7A11   |
| 228430_at    | 2.15  | 2.61 |                                                                                                      |           |
| 1553801_a_at | 2.88  | 2.61 | chromosome 14 open reading frame 126                                                                 | C14orf126 |

|              |       |      |                                                              |           |
|--------------|-------|------|--------------------------------------------------------------|-----------|
| 208900_s_at  | 2.08  | 2.61 | topoisomerase (DNA) I                                        | TOP1      |
| 208115_x_at  | 2.20  | 2.61 | chromosome 10 open reading frame 137                         | C10orf137 |
| 233110_s_at  | 2.53  | 2.61 | BCL2-like 12 (proline rich)                                  | BCL2L12   |
| 214093_s_at  | 2.78  | 2.60 | far upstream element (FUSE) binding protein 1                | FUBP1     |
| 236305_at    | 2.44  | 2.60 | Rieske (Fe-S) domain containing                              | RFESD     |
| 228146_at    | 4.25  | 2.60 | chromosome 17 open reading frame 51                          | C17orf51  |
| 221845_s_at  | 2.67  | 2.60 | ClpB caseinolytic peptidase B homolog (E. coli)              | CLPB      |
| 1558699_a_at | 2.96  | 2.59 | HERPUD family member 2                                       | HERPUD2   |
| 243188_at    | 3.71  | 2.59 | zinc finger protein 283                                      | ZNF283    |
| 1565685_at   | 2.61  | 2.59 |                                                              |           |
| 242579_at    | 2.55  | 2.59 |                                                              |           |
| 238867_at    | 6.48  | 2.59 | transmembrane protein 182                                    | TMEM182   |
| 1558256_at   | 2.39  | 2.59 |                                                              |           |
| 209300_s_at  | 3.30  | 2.58 | NECAP endocytosis associated 1                               | NECAP1    |
| 244290_at    | 8.64  | 2.58 |                                                              |           |
| 209927_s_at  | 2.77  | 2.58 | chromosome 1 open reading frame 77                           | C1orf77   |
| 202146_at    | 2.66  | 2.58 | interferon-related developmental regulator 1                 | IFRD1     |
| 226195_at    | 2.25  | 2.58 | chromosome 14 open reading frame 179                         | C14orf179 |
| 1560048_at   | 4.16  | 2.58 |                                                              |           |
| 225290_at    | 2.88  | 2.57 | ethanolamine kinase 1                                        | ETNK1     |
| 210762_s_at  | 3.52  | 2.57 | deleted in liver cancer 1                                    | DLC1      |
| 228915_at    | 2.62  | 2.57 | dachshund homolog 1 (Drosophila)                             | DACH1     |
| 241014_at    | 3.27  | 2.57 |                                                              |           |
| 225914_s_at  | 3.25  | 2.57 | calcium binding protein 39-like                              | CAB39L    |
| 209451_at    | 2.54  | 2.57 | TRAF family member-associated NFKB activator                 | TANK      |
| 217242_at    | 3.28  | 2.57 | zinc finger protein 154                                      | ZNF154    |
| 1554015_a_at | 2.65  | 2.56 | chromodomain helicase DNA binding protein 2                  | CHD2      |
| 206765_at    | 4.25  | 2.56 | potassium inwardly-rectifying channel, subfamily J, member 2 | KCNJ2     |
| 241546_at    | 3.01  | 2.56 | spermatogenesis associated 5                                 | SPATA5    |
| 206615_s_at  | 2.51  | 2.56 | ADAM metallopeptidase domain 22                              | ADAM22    |
| 228863_at    | 4.87  | 2.56 | protocadherin 17                                             | PCDH17    |
| 234996_at    | 6.53  | 2.55 |                                                              |           |
| 231577_s_at  | 2.95  | 2.55 | guanylate binding protein 1, interferon-inducible, 67kDa     | GBP1      |
| 1568673_s_at | 96.66 | 2.54 | ELL associated factor 2                                      | EAF2      |
| 228717_at    | 2.41  | 2.54 |                                                              |           |
| 219239_s_at  | 3.63  | 2.54 | zinc finger protein 654                                      | ZNF654    |
| 226181_at    | 2.65  | 2.54 | tubulin, epsilon 1                                           | TUBE1     |
| 229582_at    | 2.17  | 2.54 | chromosome 18 open reading frame 37                          | C18orf37  |
| 205716_at    | 2.16  | 2.54 | solute carrier family 25, member 40                          | SLC25A40  |
| 1564190_x_at | 2.42  | 2.54 | zinc finger protein 519                                      | ZNF519    |

|              |       |      |                                                                      |           |
|--------------|-------|------|----------------------------------------------------------------------|-----------|
| 235063_at    | 26.17 | 2.53 | chromosome 20 open reading frame 196                                 | C20orf196 |
| 243796_at    | 3.05  | 2.53 |                                                                      |           |
| 1554345_a_at | 3.91  | 2.53 | zinc finger, H2C2 domain containing                                  | ZH2C2     |
| 223651_x_at  | 4.19  | 2.53 | cell division cycle 23 homolog (S. cerevisiae)                       | CDC23     |
| 227559_at    | 2.21  | 2.53 |                                                                      |           |
| 203589_s_at  | 3.67  | 2.53 | transcription factor Dp-2 (E2F dimerization partner 2)               | TFDP2     |
| 226890_at    | 2.30  | 2.53 | WD repeat domain 35                                                  | WDR35     |
| 218739_at    | 2.21  | 2.53 | abhydrolase domain containing 5                                      | ABHD5     |
| 239479_x_at  | 3.33  | 2.53 |                                                                      |           |
| 220121_at    | 3.33  | 2.52 | lines homolog 1 (Drosophila)                                         | LINS1     |
| 218285_s_at  | 2.89  | 2.52 | 3-hydroxybutyrate dehydrogenase, type 2                              | BDH2      |
| 228766_at    | 2.25  | 2.52 | CD36 molecule (thrombospondin receptor)                              | CD36      |
| 239091_at    | 2.66  | 2.51 |                                                                      |           |
| 238063_at    | 2.58  | 2.51 |                                                                      |           |
| 244784_at    | 3.63  | 2.51 | DEAH (Asp-Glu-Ala-Asp/His) box polypeptide 57                        | DHX57     |
| 219017_at    | 2.82  | 2.51 | ethanolamine kinase 1                                                | ETNK1     |
| 222581_at    | 3.49  | 2.51 | xenotropic and polytropic retrovirus receptor                        | XPR1      |
| 202411_at    | 3.64  | 2.51 | interferon, alpha-inducible protein 27                               | IFI27     |
| 231817_at    | 2.54  | 2.51 | ubiquitin specific peptidase 53                                      | USP53     |
| 243371_at    | 3.73  | 2.51 |                                                                      |           |
| 232018_at    | 2.00  | 2.50 | leukocyte receptor cluster (LRC) member 1                            | LENG1     |
| 1559108_at   | 3.36  | 2.50 |                                                                      |           |
| 1569714_at   | 2.53  | 2.50 | zinc finger, FYVE domain containing 20                               | ZFYVE20   |
| 239995_at    | 4.68  | 2.50 |                                                                      |           |
| 222682_s_at  | 2.69  | 2.49 | chromosome 5 open reading frame 3                                    | C5orf3    |
| 1569191_at   | 3.26  | 2.49 |                                                                      |           |
| 202469_s_at  | 2.88  | 2.49 | cleavage and polyadenylation specific factor 6, 68kDa                | CPSF6     |
| 239466_at    | 2.03  | 2.49 |                                                                      |           |
| 232163_at    | 2.13  | 2.49 | WD repeat domain 19                                                  | WDR19     |
| 1556935_at   | 4.38  | 2.49 |                                                                      |           |
| 235155_at    | 4.52  | 2.49 | 3-hydroxybutyrate dehydrogenase, type 2                              | BDH2      |
| 229018_at    | 2.44  | 2.48 | chromosome 12 open reading frame 26                                  | C12orf26  |
| 231838_at    | 2.87  | 2.48 | chromosome 20 open reading frame 119                                 | C20orf119 |
| 224453_s_at  | 2.22  | 2.48 | ethanolamine kinase 1                                                | ETNK1     |
| 1554518_at   | 2.11  | 2.48 | glutathione S-transferase, C-terminal domain containing              | GSTCD     |
| 211734_s_at  | 2.31  | 2.48 | Fc fragment of IgE, high affinity I, receptor for; alpha polypeptide | FCER1A    |
| 209839_at    | 2.65  | 2.48 | dynamamin 3                                                          | DNM3      |
| 240793_at    | 2.34  | 2.47 | titin                                                                | TTN       |



|              |       |      |                                                                      |          |
|--------------|-------|------|----------------------------------------------------------------------|----------|
| 212121_at    | 2.20  | 2.47 | chromosome 10 open reading frame 61                                  | C10orf61 |
| 216279_at    | 4.82  | 2.47 | zinc finger protein 460                                              | ZNF460   |
| 224452_s_at  | 2.56  | 2.47 |                                                                      |          |
| 228090_at    | 3.22  | 2.47 | nicotinamide nucleotide adenylyltransferase 3                        | NMNAT3   |
| 232038_at    | 3.27  | 2.47 | chromosome 6 open reading frame 170                                  | C6orf170 |
| 244257_at    | 12.87 | 2.46 | transmembrane protein 104                                            | TMEM104  |
| 1554915_a_at | 2.20  | 2.46 |                                                                      |          |
| 223792_at    | 2.48  | 2.46 | zinc finger protein 2                                                | ZNF2     |
| 236551_at    | 2.83  | 2.46 | zinc finger protein 311                                              | ZNF311   |
| 239188_at    | 2.38  | 2.46 | protein phosphatase 2 (formerly 2A), regulatory subunit B", gamma    | PPP2R3C  |
| 242433_at    | 5.30  | 2.46 | zinc finger and BTB domain containing 11                             | ZBTB11   |
| 218185_s_at  | 2.03  | 2.45 | armadillo repeat containing 1                                        | ARMC1    |
| 212107_s_at  | 3.16  | 2.45 | DEAH (Asp-Glu-Ala-His) box polypeptide 9                             | DHX9     |
| 208922_s_at  | 2.24  | 2.45 | nuclear RNA export factor 1                                          | NXF1     |
| 1556061_at   | 2.67  | 2.45 | ribonuclease P/MRP 30kDa subunit                                     | RPP30    |
| 239311_at    | 3.14  | 2.45 |                                                                      |          |
| 221027_s_at  | 3.87  | 2.45 | phospholipase A2, group XIIA                                         | PLA2G12A |
| 203913_s_at  | 2.06  | 2.45 | hydroxyprostaglandin dehydrogenase 15-(NAD)                          | HPGD     |
| 213704_at    | 2.34  | 2.44 | Rab geranylgeranyltransferase, beta subunit                          | RABGGTB  |
| 218477_at    | 2.95  | 2.44 | transmembrane protein 14A                                            | TMEM14A  |
| 203176_s_at  | 2.17  | 2.44 | transcription factor A, mitochondrial                                | TFAM     |
| 1556195_a_at | 2.52  | 2.44 |                                                                      |          |
| 205934_at    | 2.65  | 2.44 | phospholipase C-like 1                                               | PLCL1    |
| 230095_at    | 2.08  | 2.44 | thioredoxin-like 2                                                   | TXNL2    |
| 235026_at    | 2.98  | 2.44 |                                                                      |          |
| 240344_x_at  | 2.59  | 2.43 | Lym7 homolog (mouse)                                                 | LYRM7    |
| 232841_at    | 2.42  | 2.43 |                                                                      |          |
| 1557985_s_at | 2.12  | 2.43 | centrosomal protein 78kDa                                            | CEP78    |
| 242828_at    | 3.62  | 2.43 | fidgetin                                                             | FIGN     |
| 242533_at    | 2.26  | 2.43 | transmembrane protein 112                                            | TMEM112  |
| 218513_at    | 2.09  | 2.42 |                                                                      |          |
| 227458_at    | 3.06  | 2.42 |                                                                      |          |
| 238946_at    | 3.14  | 2.42 |                                                                      |          |
| 221669_s_at  | 2.05  | 2.42 | acyl-Coenzyme A dehydrogenase family, member 8                       | ACAD8    |
| 218680_x_at  | 2.15  | 2.42 |                                                                      |          |
| 1552695_a_at | 2.95  | 2.42 | solute carrier family 2 (facilitated glucose transporter), member 13 | SLC2A13  |
| 213122_at    | 2.34  | 2.41 | TSPY-like 5                                                          | TSPYL5   |
| 229075_at    | 2.92  | 2.41 |                                                                      |          |
| 231850_x_at  | 2.48  | 2.41 | KIAA1712                                                             | KIAA1712 |
| 237440_at    | 3.48  | 2.41 |                                                                      |          |
| 208670_s_at  | 2.29  | 2.41 | EP300 interacting inhibitor of differentiation 1                     | EID1     |
| 218755_at    | 4.08  | 2.41 | kinesin family member 20A                                            | KIF20A   |

|              |      |      |                                                                              |          |
|--------------|------|------|------------------------------------------------------------------------------|----------|
| 226588_at    | 2.47 | 2.40 |                                                                              |          |
| 235653_s_at  | 2.42 | 2.40 | THAP domain containing 6                                                     | THAP6    |
| 206085_s_at  | 2.82 | 2.40 | cystathionase (cystathionine gamma-lyase)                                    | CTH      |
| 221927_s_at  | 3.00 | 2.40 | abhydrolase domain containing 11                                             | ABHD11   |
| 232278_s_at  | 2.34 | 2.40 | DEP domain containing 1                                                      | DEPDC1   |
| 216070_at    | 4.64 | 2.40 |                                                                              |          |
| 232247_at    | 3.99 | 2.40 | zinc finger protein 502                                                      | ZNF502   |
| 206613_s_at  | 2.44 | 2.40 | TATA box binding protein (TBP)-associated factor, RNA polymerase I, A, 48kDa | TAF1A    |
| 1557383_a_at | 3.86 | 2.39 |                                                                              |          |
| 218616_at    | 2.73 | 2.39 | integrator complex subunit 12                                                | INTS12   |
| 200895_s_at  | 2.37 | 2.39 | FK506 binding protein 4, 59kDa                                               | FKBP4    |
| 204641_at    | 2.72 | 2.39 | NIMA (never in mitosis gene a)-related kinase 2                              | NEK2     |
| 230324_at    | 2.37 | 2.39 | nuclear receptor coactivator 2                                               | NCOA2    |
| 203213_at    | 2.27 | 2.39 | cell division cycle 2, G1 to S and G2 to M                                   | CDC2     |
| 218538_s_at  | 2.30 | 2.38 | MRS2-like, magnesium homeostasis factor ( <i>S. cerevisiae</i> )             | MRS2L    |
| 223413_s_at  | 4.51 | 2.38 |                                                                              |          |
| 207183_at    | 2.36 | 2.38 | G protein-coupled receptor 19                                                | GPR19    |
| 205018_s_at  | 2.71 | 2.38 | muscleblind-like 2 ( <i>Drosophila</i> )                                     | MBNL2    |
| 210223_s_at  | 2.74 | 2.38 | major histocompatibility complex, class I-related                            | MR1      |
| 206637_at    | 2.05 | 2.38 | purinergic receptor P2Y, G-protein coupled, 14                               | P2RY14   |
| 238952_x_at  | 2.43 | 2.37 |                                                                              |          |
| 1554014_at   | 3.55 | 2.37 | chromodomain helicase DNA binding protein 2                                  | CHD2     |
| 1555384_a_at | 2.17 | 2.37 | La ribonucleoprotein domain family, member 4                                 | LARP4    |
| 235606_at    | 3.79 | 2.37 |                                                                              |          |
| 225548_at    | 7.75 | 2.37 | shroom family member 3                                                       | SHROOM3  |
| 206025_s_at  | 2.08 | 2.37 | tumor necrosis factor, alpha-induced protein 6                               | TNFAIP6  |
| 222553_x_at  | 3.15 | 2.36 | oxidation resistance 1                                                       | OXR1     |
| 243312_at    | 3.50 | 2.36 | zinc finger protein 588                                                      | ZNF588   |
| 221962_s_at  | 2.04 | 2.36 | ubiquitin-conjugating enzyme E2H (UBC8 homolog, yeast)                       | UBE2H    |
| 1554964_x_at | 4.00 | 2.36 | chromosome 6 open reading frame 192                                          | C6orf192 |
| 235697_at    | 2.05 | 2.35 |                                                                              |          |
| 205229_s_at  | 4.17 | 2.35 | coagulation factor C homolog, cochlin ( <i>Limulus polyphemus</i> )          | COCH     |
| 209551_at    | 3.10 | 2.35 | Yip1 domain family, member 4                                                 | YIPF4    |
| 227121_at    | 3.85 | 2.35 |                                                                              |          |
| 204109_s_at  | 2.05 | 2.35 | nuclear transcription factor Y, alpha                                        | NFYA     |
| 213599_at    | 2.14 | 2.35 | Opa interacting protein 5                                                    | OIP5     |
| 222184_at    | 9.97 | 2.35 |                                                                              |          |
| 209681_at    | 2.66 | 2.35 | solute carrier family 19 (thiamine transporter), member 2                    | SLC19A2  |

|              |      |      |                                                                                                 |          |
|--------------|------|------|-------------------------------------------------------------------------------------------------|----------|
| 1564231_at   | 2.55 | 2.35 | intraflagellar transport 80 homolog (Chlamydomonas)                                             | IFT80    |
| 205357_s_at  | 2.92 | 2.35 | angiotensin II receptor, type 1                                                                 | AGTR1    |
| 228003_at    | 2.23 | 2.35 | RAB30, member RAS oncogene family                                                               | RAB30    |
| 228184_at    | 2.71 | 2.35 | dispatched homolog 1 (Drosophila)                                                               | DISP1    |
| 228855_at    | 2.96 | 2.34 | nudix (nucleoside diphosphate linked moiety X)-type motif 7                                     | NUDT7    |
| 202269_x_at  | 2.79 | 2.34 | guanylate binding protein 1, interferon-inducible, 67kDa                                        | GBP1     |
| 226443_at    | 2.69 | 2.34 | family with sequence similarity 122A                                                            | FAM122A  |
| 209666_s_at  | 2.12 | 2.34 | conserved helix-loop-helix ubiquitous kinase                                                    | CHUK     |
| 201732_s_at  | 3.01 | 2.33 | chloride channel 3                                                                              | CLCN3    |
| 1556725_a_at | 2.37 | 2.33 |                                                                                                 |          |
| 228390_at    | 2.65 | 2.33 |                                                                                                 |          |
| 233241_at    | 3.77 | 2.33 | chromosome 20 open reading frame 19                                                             | C20orf19 |
| 203011_at    | 2.19 | 2.33 | inositol(myo)-1(or 4)-monophosphatase 1                                                         | IMPA1    |
| 238944_at    | 4.73 | 2.33 | zinc finger protein 404                                                                         | ZNF404   |
| 209135_at    | 4.59 | 2.33 | aspartate beta-hydroxylase                                                                      | ASPH     |
| 203159_at    | 3.34 | 2.33 | glutaminase                                                                                     | GLS      |
| 238729_x_at  | 3.05 | 2.33 |                                                                                                 |          |
| 227337_at    | 2.31 | 2.33 | ankyrin repeat domain 37                                                                        | ANKRD37  |
| 1552306_at   | 2.17 | 2.33 | asparagine-linked glycosylation 10 homolog (yeast, alpha-1,2-glucosyltransferase)               | ALG10    |
| 1556325_at   | 3.72 | 2.33 | filamin A interacting protein 1                                                                 | FILIP1   |
| 231840_x_at  | 3.42 | 2.32 | Lym7 homolog (mouse)                                                                            | LYRM7    |
| 226661_at    | 3.57 | 2.32 | cell division cycle associated 2                                                                | CDCA2    |
| 202270_at    | 2.12 | 2.32 | guanylate binding protein 1, interferon-inducible, 67kDa                                        | GBP1     |
| 200868_s_at  | 2.14 | 2.32 | zinc finger protein 313                                                                         | ZNF313   |
| 205624_at    | 2.00 | 2.32 | carboxypeptidase A3 (mast cell)                                                                 | CPA3     |
| 1563614_at   | 2.81 | 2.32 | Mdm2, transformed 3T3 cell double minute 2, p53 binding protein (mouse) binding protein, 104kDa | MTBP     |
| 239587_at    | 3.87 | 2.32 |                                                                                                 |          |
| 214349_at    | 2.56 | 2.32 |                                                                                                 |          |
| 202095_s_at  | 2.21 | 2.32 | baculoviral IAP repeat-containing 5 (survivin)                                                  | BIRC5    |
| 239400_at    | 2.80 | 2.31 |                                                                                                 |          |
| 226065_at    | 2.83 | 2.31 | prickle homolog 1 (Drosophila)                                                                  | PRICKLE1 |
| 205486_at    | 4.34 | 2.31 | testis-specific kinase 2                                                                        | TESK2    |
| 236619_at    | 2.38 | 2.31 |                                                                                                 |          |
| 224734_at    | 2.05 | 2.31 | high-mobility group box 1                                                                       | HMGB1    |
| 223834_at    | 5.06 | 2.30 | CD274 molecule                                                                                  | CD274    |
| 233981_at    | 3.43 | 2.30 |                                                                                                 |          |
| 209185_s_at  | 2.28 | 2.30 | insulin receptor substrate 2                                                                    | IRS2     |
| 225066_at    | 2.62 | 2.30 | protein phosphatase 2, regulatory subunit B, delta isoform                                      | PPP2R2D  |

|              |       |      |                                                                                   |          |
|--------------|-------|------|-----------------------------------------------------------------------------------|----------|
| 222827_s_at  | 2.16  | 2.30 | kelch repeat and BTB (POZ) domain containing 10                                   | KBTBD10  |
| 206011_at    | 3.11  | 2.29 | caspase 1, apoptosis-related cysteine peptidase (interleukin 1, beta, convertase) | CASP1    |
| 219397_at    | 4.33  | 2.29 | coenzyme Q10 homolog B (S. cerevisiae)                                            | COQ10B   |
| 232242_at    | 2.11  | 2.29 |                                                                                   |          |
| 219494_at    | 2.07  | 2.29 | RAD54 homolog B (S. cerevisiae)                                                   | RAD54B   |
| 203157_s_at  | 3.31  | 2.29 | glutaminase                                                                       | GLS      |
| 228201_at    | 2.12  | 2.29 | ADP-ribosylation factor-like 13B                                                  | ARL13B   |
| 219467_at    | 2.85  | 2.29 | zinc finger, H2C2 domain containing                                               | ZH2C2    |
| 238623_at    | 3.00  | 2.29 |                                                                                   |          |
| 235215_at    | 2.95  | 2.29 |                                                                                   |          |
| 237083_at    | 2.36  | 2.29 |                                                                                   |          |
| 203854_at    | 5.20  | 2.28 | complement factor I                                                               | CFI      |
| 1568941_a_at | 4.60  | 2.28 |                                                                                   |          |
| 223249_at    | 4.01  | 2.28 | claudin 12                                                                        | CLDN12   |
| 236546_at    | 2.25  | 2.28 |                                                                                   |          |
| 238647_at    | 2.24  | 2.28 | chromosome 14 open reading frame 28                                               | C14orf28 |
| 205420_at    | 2.08  | 2.28 | peroxisomal biogenesis factor 7                                                   | PEX7     |
| 211080_s_at  | 2.62  | 2.27 | NIMA (never in mitosis gene a)-related kinase 2                                   | NEK2     |
| 218197_s_at  | 3.66  | 2.27 | oxidation resistance 1                                                            | OXR1     |
| 229659_s_at  | 2.26  | 2.27 | polymeric immunoglobulin receptor                                                 | PIGR     |
| 235342_at    | 24.93 | 2.27 | sparc/osteonectin, cwcv and kazal-like domains proteoglycan (testican) 3          | SPOCK3   |
| 232398_at    | 2.44  | 2.27 |                                                                                   |          |
| 1553301_a_at | 3.86  | 2.27 | transmembrane protein 182                                                         | TMEM182  |
| 204920_at    | 3.09  | 2.27 | carbamoyl-phosphate synthetase 1, mitochondrial                                   | CPS1     |
| 221220_s_at  | 2.14  | 2.26 | SCY1-like 2 (S. cerevisiae)                                                       | SCYL2    |
| 239265_at    | 2.30  | 2.26 | transmembrane protein 20                                                          | TMEM20   |
| 215820_x_at  | 2.30  | 2.26 | sorting nexin 13                                                                  | SNX13    |
| 205988_at    | 3.16  | 2.26 | CD84 molecule                                                                     | CD84     |
| 207565_s_at  | 3.48  | 2.26 | major histocompatibility complex, class I-related                                 | MR1      |
| 221595_at    | 4.29  | 2.26 |                                                                                   |          |
| 1562270_at   | 29.48 | 2.26 | Rho guanine nucleotide exchange factor (GEF) 7                                    | ARHGEF7  |
| 1561965_at   | 21.11 | 2.26 |                                                                                   |          |
| 202094_at    | 3.59  | 2.25 | baculoviral IAP repeat-containing 5 (survivin)                                    | BIRC5    |
| 207630_s_at  | 2.35  | 2.25 | cAMP responsive element modulator                                                 | CREM     |
| 1568987_at   | 3.63  | 2.25 |                                                                                   |          |
| 214668_at    | 2.16  | 2.25 |                                                                                   |          |
| 210432_s_at  | 3.20  | 2.25 | sodium channel, voltage-gated, type III, alpha subunit                            | SCN3A    |
| 221640_s_at  | 2.78  | 2.25 | leucine-rich repeats and death domain containing                                  | LRDD     |
| 206591_at    | 22.44 | 2.25 | recombination activating gene 1                                                   | RAG1     |

|              |      |      |                                                                                   |           |
|--------------|------|------|-----------------------------------------------------------------------------------|-----------|
| 227787_s_at  | 3.17 | 2.25 | thyroid hormone receptor associated protein 6                                     | THRAP6    |
| 226094_at    | 2.75 | 2.24 | phosphoinositide-3-kinase, class 2, alpha polypeptide                             | PIK3C2A   |
| 232228_at    | 2.19 | 2.24 | zinc finger protein 530                                                           | ZNF530    |
| 1552970_s_at | 3.41 | 2.24 | zinc finger, MYM-type 6                                                           | ZMYM6     |
| 207717_s_at  | 2.07 | 2.24 | plakophilin 2                                                                     | PKP2      |
| 237750_at    | 4.52 | 2.24 | X-prolyl aminopeptidase (aminopeptidase P) 3, putative                            | XPNPEP3   |
| 230393_at    | 2.78 | 2.24 |                                                                                   |           |
| 234995_at    | 2.18 | 2.24 | coiled-coil domain containing 52                                                  | CCDC52    |
| 220306_at    | 3.72 | 2.24 | family with sequence similarity 46, member C                                      | FAM46C    |
| 215672_s_at  | 2.69 | 2.24 |                                                                                   |           |
| 231270_at    | 3.09 | 2.24 | carbonic anhydrase XIII                                                           | CA13      |
| 1556347_at   | 2.34 | 2.24 |                                                                                   |           |
| 1567079_at   | 3.66 | 2.24 | ceroid-lipofuscinosis, neuronal 6, late infantile, variant                        | CLN6      |
| 1559103_s_at | 4.80 | 2.24 |                                                                                   |           |
| 221596_s_at  | 2.56 | 2.24 |                                                                                   |           |
| 218346_s_at  | 3.39 | 2.23 | sestrin 1                                                                         | SESN1     |
| 243300_at    | 4.38 | 2.23 |                                                                                   |           |
| 217010_s_at  | 2.15 | 2.23 | cell division cycle 25 homolog C (S. pombe)                                       | CDC25C    |
| 226375_at    | 4.21 | 2.23 |                                                                                   |           |
| 219258_at    | 2.01 | 2.23 | TIMELESS interacting protein                                                      | TIPIN     |
| 201138_s_at  | 2.49 | 2.23 | Sjogren syndrome antigen B (autoantigen La)                                       | SSB       |
| 213124_at    | 4.47 | 2.22 | zinc finger protein 473                                                           | ZNF473    |
| 223515_s_at  | 2.97 | 2.22 | coenzyme Q3 homolog, methyltransferase (S. cerevisiae)                            | COQ3      |
| 203610_s_at  | 2.36 | 2.22 | tripartite motif-containing 38                                                    | TRIM38    |
| 219287_at    | 3.89 | 2.22 | potassium large conductance calcium-activated channel, subfamily M, beta member 4 | KCNMB4    |
| 1557826_at   | 2.06 | 2.22 |                                                                                   |           |
| 222128_at    | 3.17 | 2.22 | NOL1/NOP2/Sun domain family, member 6                                             | NSUN6     |
| 219294_at    | 2.67 | 2.22 | centromere protein Q                                                              | CENPQ     |
| 239482_x_at  | 2.17 | 2.22 | zinc finger protein 708                                                           | ZNF708    |
| 201214_s_at  | 2.12 | 2.22 | protein phosphatase 1, regulatory (inhibitor) subunit 7                           | PPP1R7    |
| 222729_at    | 2.26 | 2.22 |                                                                                   |           |
| 221104_s_at  | 3.07 | 2.22 | nipsnap homolog 3B (C. elegans)                                                   | NIPSNAP3B |
| 1557278_s_at | 2.16 | 2.21 | transportin 1                                                                     | TNPO1     |
| 237745_at    | 3.79 | 2.21 |                                                                                   |           |
| 209375_at    | 2.73 | 2.21 | xeroderma pigmentosum, complementation group C                                    | XPC       |
| 208392_x_at  | 2.35 | 2.21 | SP110 nuclear body protein                                                        | SP110     |
| 49077_at     | 2.21 | 2.21 | protein phosphatase methylesterase 1                                              | PPME1     |
| 227022_at    | 2.25 | 2.21 | glucosamine-6-phosphate deaminase 2                                               | GNPDA2    |
| 219826_at    | 3.42 | 2.21 | zinc finger protein 419                                                           | ZNF419    |

|              |      |      |                                                                 |           |
|--------------|------|------|-----------------------------------------------------------------|-----------|
| 235423_at    | 2.15 | 2.21 |                                                                 |           |
| 213930_at    | 2.37 | 2.21 |                                                                 |           |
| 202768_at    | 2.14 | 2.21 | FBJ murine osteosarcoma viral oncogene homolog B                | FOSB      |
| 218784_s_at  | 2.61 | 2.21 | chromosome 6 open reading frame 64                              | C6orf64   |
| 219651_at    | 2.43 | 2.21 | developmental pluripotency associated 4                         | DPPA4     |
| 226271_at    | 3.16 | 2.20 | ganglioside-induced differentiation-associated protein 1        | GDAP1     |
| 1566472_s_at | 2.31 | 2.20 |                                                                 |           |
| 243943_x_at  | 2.52 | 2.20 | chromosome 6 open reading frame 52                              | C6orf52   |
| 214537_at    | 2.68 | 2.20 | histone cluster 1, H1d                                          | HIST1H1D  |
| 1557701_s_at | 2.58 | 2.20 | polymerase (DNA directed), eta                                  | POLH      |
| 205260_s_at  | 2.65 | 2.20 | acylphosphatase 1, erythrocyte (common) type                    | ACYP1     |
| 229586_at    | 2.14 | 2.20 | chromodomain helicase DNA binding protein 9                     | CHD9      |
| 1569318_at   | 2.21 | 2.20 |                                                                 |           |
| 214734_at    | 3.39 | 2.19 | exophilin 5                                                     | EXPH5     |
| 215220_s_at  | 2.67 | 2.19 | translocated promoter region (to activated MET oncogene)        | TPR       |
| 37577_at     | 3.30 | 2.19 | Rho GTPase activating protein 19                                | ARHGAP19  |
| 223434_at    | 2.27 | 2.19 | guanylate binding protein 3                                     | GBP3      |
| 227805_at    | 2.09 | 2.19 |                                                                 |           |
| 243055_at    | 2.55 | 2.19 |                                                                 |           |
| 230491_at    | 3.77 | 2.19 |                                                                 |           |
| 219822_at    | 2.50 | 2.19 | mitochondrial translational release factor 1                    | MTRF1     |
| 222513_s_at  | 3.61 | 2.18 | sorbin and SH3 domain containing 1                              | SORBS1    |
| 219177_at    | 2.36 | 2.18 | brix domain containing 2                                        | BXDC2     |
| 218043_s_at  | 2.40 | 2.18 | 5-azacytidine induced 2                                         | AZI2      |
| 214061_at    | 2.82 | 2.18 | WD repeat domain 67                                             | WDR67     |
| 206828_at    | 4.37 | 2.18 | TXK tyrosine kinase                                             | TXK       |
| 221786_at    | 2.50 | 2.18 | chromosome 6 open reading frame 120                             | C6orf120  |
| 205011_at    | 3.10 | 2.18 | loss of heterozygosity, 11, chromosomal region 2, gene A        | LOH11CR2A |
| 206383_s_at  | 2.45 | 2.18 | GTPase activating protein (SH3 domain) binding protein 2        | G3BP2     |
| 235839_at    | 2.62 | 2.18 |                                                                 |           |
| 229374_at    | 4.55 | 2.17 | EPH receptor A4                                                 | EPHA4     |
| 212973_at    | 3.21 | 2.17 | ribose 5-phosphate isomerase A (ribose 5-phosphate epimerase)   | RPIA      |
| 204392_at    | 2.14 | 2.17 | calcium/calmodulin-dependent protein kinase I                   | CAMK1     |
| 201847_at    | 2.87 | 2.17 | lipase A, lysosomal acid, cholesterol esterase (Wolman disease) | LIPA      |
| 1555598_a_at | 3.85 | 2.17 | dual specificity phosphatase 19                                 | DUSP19    |
| 214862_x_at  | 2.20 | 2.17 |                                                                 |           |
| 226537_at    | 2.66 | 2.17 | histidine triad nucleotide binding protein 3                    | HINT3     |

|             |      |      |                                                                       |           |
|-------------|------|------|-----------------------------------------------------------------------|-----------|
| 222805_at   | 2.25 | 2.16 | mannosidase, endo-alpha                                               | MANEA     |
| 204971_at   | 2.11 | 2.16 | cystatin A (stefin A)                                                 | CSTA      |
| 1557192_at  | 2.66 | 2.16 | chromosome 1 open reading frame 136                                   | C1orf136  |
| 225847_at   | 3.34 | 2.16 | arylacetamide deacetylase-like 1                                      | AADACL1   |
| 1569114_at  | 3.20 | 2.16 |                                                                       |           |
| 221705_s_at | 2.51 | 2.16 |                                                                       |           |
| 228841_at   | 2.86 | 2.16 |                                                                       |           |
| 226252_at   | 4.49 | 2.15 |                                                                       |           |
| 203947_at   | 2.46 | 2.15 | cleavage stimulation factor, 3' pre-RNA, subunit 3, 77kDa             | CSTF3     |
| 227170_at   | 2.04 | 2.15 |                                                                       |           |
| 219915_s_at | 3.07 | 2.15 | solute carrier family 16, member 10 (aromatic amino acid transporter) | SLC16A10  |
| 212077_at   | 3.57 | 2.15 | caldesmon 1                                                           | CALD1     |
| 241115_at   | 2.25 | 2.15 | KIAA1467                                                              | KIAA1467  |
| 218135_at   | 2.39 | 2.15 | ERGIC and golgi 2                                                     | ERGIC2    |
| 221928_at   | 2.31 | 2.15 | acetyl-Coenzyme A carboxylase beta                                    | ACACB     |
| 1561948_at  | 3.13 | 2.15 | coenzyme Q10 homolog B (S. cerevisiae)                                | COQ10B    |
| 219875_s_at | 2.83 | 2.15 | chromosome 1 open reading frame 121                                   | C1orf121  |
| 231950_at   | 2.33 | 2.14 | zinc finger protein 658                                               | ZNF658    |
| 213156_at   | 4.39 | 2.14 |                                                                       |           |
| 227967_at   | 2.08 | 2.14 | tubulin, gamma complex associated protein 5                           | TUBGCP5   |
| 214277_at   | 2.96 | 2.14 | COX11 homolog, cytochrome c oxidase assembly protein (yeast)          | COX11     |
| 212510_at   | 2.17 | 2.14 | glycerol-3-phosphate dehydrogenase 1-like                             | GPD1L     |
| 234531_at   | 3.41 | 2.13 |                                                                       |           |
| 210976_s_at | 2.47 | 2.13 | phosphofructokinase, muscle                                           | PFKM      |
| 210755_at   | 8.45 | 2.13 | hepatocyte growth factor (hepapoietin A; scatter factor)              | HGF       |
| 242838_at   | 2.17 | 2.13 | MAP6 domain containing 1                                              | MAP6D1    |
| 219343_at   | 3.06 | 2.13 | cell division cycle 37 homolog (S. cerevisiae)-like 1                 | CDC37L1   |
| 205776_at   | 2.27 | 2.13 | flavin containing monooxygenase 5                                     | FMO5      |
| 218373_at   | 2.20 | 2.13 | AKT interacting protein                                               | AKTIP     |
| 227812_at   | 2.28 | 2.13 | tumor necrosis factor receptor superfamily, member 19                 | TNFRSF19  |
| 226948_at   | 2.16 | 2.13 | rhomboid domain containing 1                                          | RHBDD1    |
| 235125_x_at | 2.09 | 2.13 |                                                                       |           |
| 228029_at   | 2.20 | 2.13 | ATP-binding cassette, sub-family A (ABC1), member 11 (pseudogene)     | ABCA11    |
| 210465_s_at | 2.09 | 2.13 | small nuclear RNA activating complex, polypeptide 3, 50kDa            | SNAPC3    |
| 224447_s_at | 2.09 | 2.13 | chromosome 17 open reading frame 37                                   | C17orf37  |
| 223764_x_at | 3.82 | 2.13 | nipsnap homolog 3B (C. elegans)                                       | NIPSNAP3B |
| 207046_at   | 3.17 | 2.12 | histone cluster 2, H4a                                                | HIST2H4A  |
| 222958_s_at | 2.21 | 2.12 | DEP domain containing 1                                               | DEPDC1    |

|             |      |      |                                                                            |          |
|-------------|------|------|----------------------------------------------------------------------------|----------|
| 228050_at   | 2.26 | 2.12 | UTP15, U3 small nucleolar ribonucleoprotein, homolog (S. cerevisiae)       | UTP15    |
| 213934_s_at | 3.43 | 2.12 | zinc finger protein 23 (KOX 16)                                            | ZNF23    |
| 232600_at   | 3.18 | 2.12 | ankyrin repeat domain 42                                                   | ANKRD42  |
| 228328_at   | 2.13 | 2.12 | kelch-like 28 (Drosophila)                                                 | KLHL28   |
| 201243_s_at | 2.43 | 2.12 | ATPase, Na <sup>+</sup> /K <sup>+</sup> transporting, beta 1 polypeptide   | ATP1B1   |
| 219662_at   | 2.13 | 2.12 | chromosome 2 open reading frame 49                                         | C2orf49  |
| 202007_at   | 2.08 | 2.12 | nidogen 1                                                                  | NID1     |
| 227084_at   | 2.23 | 2.11 | dystrobrevin, alpha                                                        | DTNA     |
| 210215_at   | 2.42 | 2.11 | transferrin receptor 2                                                     | TFR2     |
| 244359_s_at | 2.35 | 2.11 |                                                                            |          |
| 244641_at   | 2.63 | 2.11 | chromosome 7 open reading frame 30                                         | C7orf30  |
| 228305_at   | 2.45 | 2.11 | zinc finger protein 565                                                    | ZNF565   |
| 1552735_at  | 3.27 | 2.11 | protocadherin gamma subfamily A, 4                                         | PCDHGA4  |
| 238057_at   | 2.50 | 2.11 | ubiquitin specific peptidase 45                                            | USP45    |
| 219918_s_at | 3.10 | 2.10 | asp (abnormal spindle) homolog, microcephaly associated (Drosophila)       | ASPM     |
| 223462_at   | 3.18 | 2.10 | transmembrane protein 175                                                  | TMEM175  |
| 1555350_at  | 2.68 | 2.10 | periphilin 1                                                               | PPHLN1   |
| 204271_s_at | 4.45 | 2.10 | endothelin receptor type B                                                 | EDNRB    |
| 237081_at   | 2.04 | 2.10 |                                                                            |          |
| 242900_at   | 3.65 | 2.10 |                                                                            |          |
| 218264_at   | 2.01 | 2.10 | BRCA2 and CDKN1A interacting protein                                       | BCCIP    |
| 1569250_at  | 3.04 | 2.09 | zinc finger protein 333                                                    | ZNF333   |
| 227686_at   | 2.06 | 2.09 | oxidoreductase NAD-binding domain containing 1                             | OXNAD1   |
| 213761_at   | 2.45 | 2.09 | Mdm4, transformed 3T3 cell double minute 1, p53 binding protein (mouse)    | MDM1     |
| 212738_at   | 2.92 | 2.09 | Rho GTPase activating protein 19                                           | ARHGAP19 |
| 238634_x_at | 4.57 | 2.09 |                                                                            |          |
| 202823_at   | 2.07 | 2.09 | transcription elongation factor B (SIII), polypeptide 1 (15kDa, elongin C) | TCEB1    |
| 223036_at   | 2.42 | 2.09 | phenylalanine-tRNA synthetase-like, beta subunit                           | FARSLB   |
| 225834_at   | 2.75 | 2.09 |                                                                            |          |
| 212936_at   | 2.44 | 2.09 | chromosome 5 open reading frame 21                                         | C5orf21  |
| 222317_at   | 3.84 | 2.09 | phosphodiesterase 3B, cGMP-inhibited                                       | PDE3B    |
| 225023_at   | 4.81 | 2.09 | golgi associated PDZ and coiled-coil motif containing                      | GOPC     |
| 226787_at   | 2.57 | 2.09 | zinc finger protein 18                                                     | ZNF18    |
| 219667_s_at | 2.11 | 2.09 | B-cell scaffold protein with ankyrin repeats 1                             | BANK1    |



|               |      |      |                                                               |          |
|---------------|------|------|---------------------------------------------------------------|----------|
| 203763_at     | 2.88 | 2.09 | dynein, cytoplasmic 2, light intermediate chain 1             | DYNC2LI1 |
| 223538_at     | 2.27 | 2.09 | small EDRK-rich factor 1A (telomeric)                         | SERF1A   |
| 219587_at     | 4.28 | 2.08 | tetratricopeptide repeat domain 12                            | TTC12    |
| 239406_at     | 2.41 | 2.08 | zinc finger protein 193                                       | ZNF193   |
| 201707_at     | 2.84 | 2.08 | peroxisomal biogenesis factor 19                              | PEX19    |
| 236613_at     | 4.18 | 2.08 | RNA binding motif protein 25                                  | RBM25    |
| 215239_x_at   | 2.43 | 2.08 | zinc finger protein 273                                       | ZNF273   |
| 226558_at     | 2.22 | 2.08 |                                                               |          |
| 209795_at     | 4.57 | 2.07 | CD69 molecule                                                 | CD69     |
| 238773_at     | 4.49 | 2.07 | methyltransferase 5 domain containing 1                       | METT5D1  |
| 229532_at     | 3.06 | 2.07 | zinc finger protein 502                                       | ZNF502   |
| 204008_at     | 2.61 | 2.07 | dynein, axonemal, light chain 4                               | DNAL4    |
| 236217_at     | 2.46 | 2.07 | solute carrier family 31 (copper transporters), member 1      | SLC31A1  |
| 242628_at     | 2.26 | 2.07 | killer cell lectin-like receptor subfamily B, member 1        | KLRB1    |
| 220843_s_at   | 2.42 | 2.07 | WD repeats and SOF1 domain containing                         | WDSOF1   |
| 235453_at     | 2.99 | 2.07 |                                                               |          |
| 215624_at     | 2.31 | 2.07 | tuberous sclerosis 2                                          | TSC2     |
| 226803_at     | 2.32 | 2.07 | chromatin modifying protein 4C                                | CHMP4C   |
| 219951_s_at   | 2.98 | 2.07 | chromosome 20 open reading frame 12                           | C20orf12 |
| 235387_at     | 3.04 | 2.06 | glutathione S-transferase, C-terminal domain containing       | GSTCD    |
| 223570_at     | 3.19 | 2.06 | MCM10 minichromosome maintenance deficient 10 (S. cerevisiae) | MCM10    |
| 210559_s_at   | 2.37 | 2.06 | cell division cycle 2, G1 to S and G2 to M                    | CDC2     |
| 221201_s_at   | 2.38 | 2.06 | zinc finger protein 155                                       | ZNF155   |
| 238614_x_at   | 2.56 | 2.06 | zinc finger protein 430                                       | ZNF430   |
| 219980_at     | 2.66 | 2.06 | chromosome 4 open reading frame 29                            | C4orf29  |
| 205427_at     | 2.24 | 2.06 | zinc finger protein 354A                                      | ZNF354A  |
| 226811_at     | 3.37 | 2.06 | family with sequence similarity 46, member C                  | FAM46C   |
| 203712_at     | 2.24 | 2.06 | KIAA0020                                                      | KIAA0020 |
| 232696_at     | 2.40 | 2.06 |                                                               |          |
| 225737_s_at   | 2.04 | 2.06 | F-box protein 22                                              | FBXO22   |
| AFFX-HUMRGE/Λ | 2.16 | 2.05 |                                                               |          |
| 214751_at     | 2.10 | 2.05 | zinc finger protein 468                                       | ZNF468   |
| 213452_at     | 2.86 | 2.05 | zinc finger protein 184                                       | ZNF184   |
| 208895_s_at   | 2.06 | 2.05 | DEAD (Asp-Glu-Ala-Asp) box polypeptide 18                     | DDX18    |
| 211792_s_at   | 2.01 | 2.05 | cyclin-dependent kinase inhibitor 2C (p18, inhibits CDK4)     | CDKN2C   |
| 222962_s_at   | 2.65 | 2.05 | MCM10 minichromosome maintenance deficient 10 (S. cerevisiae) | MCM10    |

|              |       |      |                                                             |          |
|--------------|-------|------|-------------------------------------------------------------|----------|
| 1554341_a_at | 2.11  | 2.05 |                                                             |          |
| 217564_s_at  | 2.95  | 2.05 | carbamoyl-phosphate synthetase 1, mitochondrial             | CPS1     |
| 223559_s_at  | 2.02  | 2.05 | chromosome 9 open reading frame 80                          | C9orf80  |
| 225062_at    | 2.32  | 2.05 |                                                             |          |
| 1564002_a_at | 2.61  | 2.04 | chromosome 6 open reading frame 199                         | C6orf199 |
| 1555439_at   | 2.22  | 2.04 | general transcription factor IIIC, polypeptide 3, 102kDa    | GTF3C3   |
| 225521_at    | 2.22  | 2.04 | anaphase promoting complex subunit 7                        | ANAPC7   |
| 1568658_at   | 2.53  | 2.04 |                                                             |          |
| 231332_at    | 4.74  | 2.04 |                                                             |          |
| 204804_at    | 2.87  | 2.04 | tripartite motif-containing 21                              | TRIM21   |
| 235456_at    | 2.97  | 2.04 |                                                             |          |
| 1555125_at   | 3.56  | 2.04 | chromosome 21 open reading frame 66                         | C21orf66 |
| 238565_at    | 2.48  | 2.04 |                                                             |          |
| 241757_x_at  | 2.18  | 2.04 | dynein, cytoplasmic 2, light intermediate chain 1           | DYNC2LI1 |
| 213158_at    | 4.04  | 2.04 |                                                             |          |
| 213959_s_at  | 3.17  | 2.04 |                                                             |          |
| 218196_at    | 2.33  | 2.04 | osteopetrosis associated transmembrane protein 1            | OSTM1    |
| 220716_at    | 2.66  | 2.03 |                                                             |          |
| 219531_at    | 2.24  | 2.03 | centrosomal protein 72kDa                                   | CEP72    |
| 230329_s_at  | 2.75  | 2.03 | nudix (nucleoside diphosphate linked moiety X)-type motif 6 | NUDT6    |
| 202124_s_at  | 2.94  | 2.03 | trafficking protein, kinesin binding 2                      | TRAK2    |
| 208066_s_at  | 2.60  | 2.03 | general transcription factor IIB                            | GTF2B    |
| 238158_at    | 3.88  | 2.03 | meiosis expressed gene 1 homolog (mouse)                    | MEIG1    |
| 243293_at    | 4.00  | 2.03 |                                                             |          |
| 221696_s_at  | 2.43  | 2.03 | serine/threonine/tyrosine kinase 1                          | STYK1    |
| 242673_at    | 2.02  | 2.03 | ubiquitin protein ligase E3C                                | UBE3C    |
| 230657_at    | 2.43  | 2.03 |                                                             |          |
| 1558390_at   | 31.94 | 2.03 | zinc finger protein 599                                     | ZNF599   |
| 236957_at    | 2.44  | 2.03 | cell division cycle associated 2                            | CDCA2    |
| 239151_at    | 2.33  | 2.03 | centaurin, gamma-like family, member 6                      | CTGLF6   |
| 219345_at    | 2.55  | 2.02 | bolA homolog 1 (E. coli)                                    | BOLA1    |
| 205130_at    | 2.31  | 2.02 | renal tumor antigen                                         | RAGE     |
| 202742_s_at  | 2.83  | 2.02 | protein kinase, cAMP-dependent, catalytic, beta             | PRKACB   |
| 1554606_at   | 2.28  | 2.02 | coiled-coil domain containing 100                           | CCDC100  |
| 202893_at    | 2.49  | 2.02 | unc-13 homolog B (C. elegans)                               | UNC13B   |
| 229338_at    | 2.59  | 2.02 |                                                             |          |
| 1553120_at   | 2.71  | 2.02 | claspin homolog (Xenopus laevis)                            | CLSPN    |
| 231112_at    | 4.79  | 2.02 | small nuclear ribonucleoprotein polypeptide E               | SNRPE    |
| 222130_s_at  | 2.32  | 2.02 | FtsJ homolog 2 (E. coli)                                    | FTSJ2    |

|              |         |        |                                                                                                |          |
|--------------|---------|--------|------------------------------------------------------------------------------------------------|----------|
| 1569652_at   | 2.28    | 2.02   | myeloid/lymphoid or mixed-lineage leukemia (trithorax homolog, Drosophila); translocated to, 3 | MLLT3    |
| 208896_at    | 2.25    | 2.02   | DEAD (Asp-Glu-Ala-Asp) box polypeptide 18                                                      | DDX18    |
| 222851_at    | 2.24    | 2.02   | zinc finger protein 654                                                                        | ZNF654   |
| 242458_at    | 2.75    | 2.02   | Ral GEF with PH domain and SH3 binding motif 2                                                 | RALGPS2  |
| 239346_at    | 2.57    | 2.02   |                                                                                                |          |
| 243038_at    | 3.14    | 2.02   | RNA binding motif protein 43                                                                   | RBM43    |
| 202705_at    | 2.67    | 2.01   | cyclin B2                                                                                      | CCNB2    |
| 233020_at    | 2.23    | 2.01   |                                                                                                |          |
| 202577_s_at  | 2.44    | 2.01   | DEAD (Asp-Glu-Ala-As) box polypeptide 19A                                                      | DDX19A   |
| 241741_at    | 2.30    | 2.01   | cardiolipin synthase 1                                                                         | CRLS1    |
| 227414_at    | 2.07    | 2.01   | rhomboid domain containing 1                                                                   | RHBDD1   |
| 224370_s_at  | 2.23    | 2.01   | calcyphosine 2                                                                                 | CAPS2    |
| 227624_at    | 2.12    | 2.01   | KIAA1546                                                                                       | KIAA1546 |
| 221025_x_at  | 3.59    | 2.00   | pseudouridylate synthase 7 homolog (S. cerevisiae)-like                                        | PUS7L    |
| 204525_at    | 2.50    | 2.00   | PHD finger protein 14                                                                          | PHF14    |
| 215128_at    | 2.35    | 2.00   |                                                                                                |          |
| 1559922_at   | 2.45    | 2.00   |                                                                                                |          |
| 224723_x_at  | 2.52    | 2.00   |                                                                                                |          |
| 211251_x_at  | 2.47    | 2.00   | nuclear transcription factor Y, gamma                                                          | NFYC     |
| 1552684_a_at | 2.59    | 2.00   | SUMO/sentrin specific peptidase family member 8                                                | SENP8    |
| 224474_x_at  | 2.53    | 2.00   | SMEK homolog 2, suppressor of mek1 (Dictyostelium)                                             | SMEK2    |
| 238831_at    | 4.17    | 2.00   |                                                                                                |          |
| 226913_s_at  | -46.14  | -76.20 | SRY (sex determining region Y)-box 8                                                           | SOX8     |
| 242963_at    | -110.21 | -62.21 |                                                                                                |          |
| 208978_at    | -40.17  | -52.19 | cysteine-rich protein 2                                                                        | CRIP2    |
| 210612_s_at  | -3.62   | -49.69 | synaptojanin 2                                                                                 | SYNJ2    |
| 221195_at    | -2.03   | -39.03 |                                                                                                |          |
| 1556067_a_at | -4.77   | -37.32 | jumonji domain containing 3                                                                    | JMJD3    |
| 206251_s_at  | -2.94   | -30.28 | arginine vasopressin receptor 1A                                                               | AVPR1A   |
| 223887_at    | -25.78  | -26.03 | G protein-coupled receptor 132                                                                 | GPR132   |
| 209683_at    | -8.40   | -24.14 | family with sequence similarity 49, member A                                                   | FAM49A   |
| 228362_s_at  | -3.15   | -22.54 |                                                                                                |          |
| 203961_at    | -5.93   | -22.15 | nebullette                                                                                     | NEBL     |
| 226084_at    | -2.01   | -21.79 | microtubule-associated protein 1B                                                              | MAP1B    |
| 229830_at    | -17.43  | -21.61 |                                                                                                |          |
| 242316_at    | -3.23   | -21.20 |                                                                                                |          |
| 219049_at    | -3.58   | -20.25 |                                                                                                |          |
| 205398_s_at  | -24.15  | -19.88 | SMAD family member 3                                                                           | SMAD3    |
| 221530_s_at  | -23.62  | -19.77 | basic helix-loop-helix domain containing, class B, 3                                           | BHLHB3   |
| 232151_at    | -27.85  | -18.54 |                                                                                                |          |

|              |         |        |                                                                                           |          |
|--------------|---------|--------|-------------------------------------------------------------------------------------------|----------|
| 227347_x_at  | -21.06  | -18.17 | hairy and enhancer of split 4<br>(Drosophila)                                             | HES4     |
| 1552334_at   | -2.92   | -17.25 | TRIO and F-actin binding protein                                                          | TRIOBP   |
| 216322_at    | -3.50   | -16.00 | CD58 molecule                                                                             | CD58     |
| 210538_s_at  | -33.87  | -15.13 | baculoviral IAP repeat-containing 3                                                       | BIRC3    |
| 227478_at    | -9.12   | -15.04 | SET binding protein 1                                                                     | SETBP1   |
| 235735_at    | -31.79  | -14.79 |                                                                                           |          |
| 226282_at    | -7.71   | -14.49 |                                                                                           |          |
| 223798_at    | -26.28  | -14.39 | solute carrier family 41, member 2                                                        | SLC41A2  |
| 209278_s_at  | -27.06  | -14.32 | tissue factor pathway inhibitor 2                                                         | TFPI2    |
| 1570622_at   | -2.03   | -14.23 |                                                                                           |          |
| 228885_at    | -49.21  | -13.91 | ribosomal protein L24                                                                     | RPL24    |
| 223520_s_at  | -3.01   | -13.64 | kinesin family member 13A                                                                 | KIF13A   |
| 235359_at    | -47.75  | -13.16 | leucine rich repeat containing 33                                                         | LRRC33   |
| 202404_s_at  | -18.69  | -13.08 | collagen, type I, alpha 2                                                                 | COL1A2   |
| 219878_s_at  | -33.40  | -12.76 | Kruppel-like factor 13                                                                    | KLF13    |
| 205419_at    | -48.28  | -12.70 | Epstein-Barr virus induced gene 2<br>(lymphocyte-specific G protein-<br>coupled receptor) | EBI2     |
| 211986_at    | -9.47   | -12.35 | AHNAK nucleoprotein (desmoyokin)                                                          | AHNAK    |
| 205463_s_at  | -18.46  | -12.07 | platelet-derived growth factor alpha<br>polypeptide                                       | PDGFA    |
| 1563135_at   | -22.89  | -12.05 |                                                                                           |          |
| 221565_s_at  | -23.55  | -11.86 | family with sequence similarity 26,<br>member B                                           | FAM26B   |
| 35626_at     | -5.38   | -11.54 | N-sulfoglucosamine sulfohydrolase<br>(sulfamidase)                                        | SGSH     |
| 224393_s_at  | -28.66  | -11.19 | cat eye syndrome chromosome<br>region, candidate 6                                        | CECR6    |
| 227396_at    | -9.76   | -11.18 |                                                                                           |          |
| 210029_at    | -18.98  | -10.92 | indoleamine-pyrrole 2,3 dioxygenase                                                       | INDO     |
| 1568623_a_at | -215.69 | -10.83 | solute carrier family 35, member E4                                                       | SLC35E4  |
| 230980_x_at  | -3.62   | -10.82 |                                                                                           |          |
| 212464_s_at  | -3.40   | -10.76 | fibronectin 1                                                                             | FN1      |
| 212827_at    | -10.42  | -10.55 | immunoglobulin heavy constant mu                                                          | IGHM     |
| 227233_at    | -4.88   | -10.46 | tetraspanin 2                                                                             | TSPAN2   |
| 228188_at    | -4.74   | -10.29 | FOS-like antigen 2                                                                        | FOSL2    |
| 226189_at    | -13.24  | -10.12 | integrin, beta 8                                                                          | ITGB8    |
| 202403_s_at  | -16.01  | -10.05 | collagen, type I, alpha 2                                                                 | COL1A2   |
| 234455_at    | -3.52   | -9.98  | zinc finger protein 1 homolog<br>(mouse)                                                  | ZFP1     |
| 202207_at    | -21.32  | -9.74  | ADP-ribosylation factor-like 4C                                                           | ARL4C    |
| 202436_s_at  | -7.03   | -9.69  | cytochrome P450, family 1,<br>subfamily B, polypeptide 1                                  | CYP1B1   |
| 240533_at    | -2.14   | -9.56  |                                                                                           |          |
| 221843_s_at  | -19.59  | -9.45  | KIAA1609                                                                                  | KIAA1609 |
| 244533_at    | -5.69   | -9.44  |                                                                                           |          |
| 213839_at    | -12.94  | -9.33  |                                                                                           |          |
| 204908_s_at  | -42.26  | -9.10  | B-cell CLL/lymphoma 3                                                                     | BCL3     |
| 228054_at    | -5.42   | -8.97  | transmembrane protein 44                                                                  | TMEM44   |
| 230050_at    | -2.56   | -8.87  | BTB (POZ) domain containing 14A                                                           | BTBD14A  |
| 226679_at    | -8.65   | -8.66  | solute carrier family 26, member 11                                                       | SLC26A11 |

|              |         |       |                                                                                |          |
|--------------|---------|-------|--------------------------------------------------------------------------------|----------|
| 204567_s_at  | -8.69   | -8.61 | ATP-binding cassette, sub-family G (WHITE), member 1                           | ABCG1    |
| 223474_at    | -12.61  | -8.59 | chromosome 14 open reading frame 4                                             | C14orf4  |
| 224989_at    | -3.95   | -8.54 |                                                                                |          |
| 203045_at    | -133.34 | -8.44 | ninjurin 1                                                                     | NINJ1    |
| 235874_at    | -22.90  | -8.39 | protease, serine, 35                                                           | PRSS35   |
| 209277_at    | -37.33  | -8.31 | tissue factor pathway inhibitor 2                                              | TFPI2    |
| 201324_at    | -18.34  | -8.31 | epithelial membrane protein 1                                                  | EMP1     |
| 201170_s_at  | -22.99  | -8.27 | basic helix-loop-helix domain containing, class B, 2                           | BHLHB2   |
| 230913_at    | -21.32  | -8.27 |                                                                                |          |
| 229728_at    | -5.47   | -8.26 |                                                                                |          |
| 201325_s_at  | -28.89  | -8.21 | epithelial membrane protein 1                                                  | EMP1     |
| 242814_at    | -13.41  | -8.14 | serpin peptidase inhibitor, clade B (ovalbumin), member 9                      | SERPINB9 |
| 225615_at    | -67.29  | -8.13 |                                                                                |          |
| 202948_at    | -18.86  | -8.13 | interleukin 1 receptor, type I                                                 | IL1R1    |
| 228042_at    | -5.89   | -8.03 | ADP-ribosylarginine hydrolase                                                  | ADPRH    |
| 227038_at    | -14.14  | -7.91 |                                                                                |          |
| 207216_at    | -6.75   | -7.85 | tumor necrosis factor (ligand) superfamily, member 8                           | TNFSF8   |
| 230493_at    | -63.61  | -7.81 | transmembrane protein 46                                                       | TMEM46   |
| 226530_at    | -26.24  | -7.80 | Bcl2 modifying factor                                                          | BMF      |
| 226490_at    | -3.08   | -7.68 | NHS-like 1                                                                     | NHSL1    |
| 1568619_s_at | -5.00   | -7.67 |                                                                                |          |
| 221016_s_at  | -13.88  | -7.62 | transcription factor 7-like 1 (T-cell specific, HMG-box)                       | TCF7L1   |
| 242321_at    | -5.96   | -7.44 |                                                                                |          |
| 214255_at    | -10.83  | -7.42 | ATPase, Class V, type 10A                                                      | ATP10A   |
| 221234_s_at  | -14.42  | -7.41 | BTB and CNC homology 1, basic leucine zipper transcription factor 2            | BACH2    |
| 201373_at    | -7.31   | -7.41 | plectin 1, intermediate filament binding protein 500kDa                        | PLEC1    |
| 227923_at    | -7.39   | -7.39 | SH3 and multiple ankyrin repeat domains 3                                      | SHANK3   |
| 227052_at    | -10.82  | -7.36 |                                                                                |          |
| 206618_at    | -4.20   | -7.33 | interleukin 18 receptor 1                                                      | IL18R1   |
| 226056_at    | -6.56   | -7.31 |                                                                                |          |
| 244481_at    | -3.72   | -7.29 | solute carrier family 25 (mitochondrial carrier; phosphate carrier), member 24 | SLC25A24 |
| 202357_s_at  | -7.85   | -7.27 | complement factor B                                                            | CFB      |
| 231779_at    | -6.98   | -7.23 | interleukin-1 receptor-associated kinase 2                                     | IRAK2    |
| 229687_s_at  | -4.44   | -7.20 |                                                                                |          |
| 1556423_at   | -5.31   | -7.17 | vasohibin 1                                                                    | VASH1    |
| 219383_at    | -4.85   | -7.13 |                                                                                |          |
| 212647_at    | -2.58   | -7.09 | related RAS viral (r-ras) oncogene homolog                                     | RRAS     |
| 235306_at    | -3.24   | -7.02 | GTPase, IMAP family member 8                                                   | GIMAP8   |
| 227329_at    | -22.93  | -7.01 | zinc finger and BTB domain containing 46                                       | ZBTB46   |

|              |        |       |                                                                                        |           |
|--------------|--------|-------|----------------------------------------------------------------------------------------|-----------|
| 235264_at    | -2.71  | -6.95 |                                                                                        |           |
| 202071_at    | -10.61 | -6.92 | syndecan 4 (amphiglycan, ryudocan)                                                     | SDC4      |
| 202464_s_at  | -17.97 | -6.89 | 6-phosphofructo-2-kinase/fructose-2,6-biphosphatase 3                                  | PFKFB3    |
| 234989_at    | -23.17 | -6.82 |                                                                                        |           |
| 224516_s_at  | -16.94 | -6.80 | CXXC finger 5                                                                          | CXXC5     |
| 219563_at    | -19.69 | -6.80 | chromosome 14 open reading frame 139                                                   | C14orf139 |
| 202342_s_at  | -4.41  | -6.77 | tripartite motif-containing 2                                                          | TRIM2     |
| 237516_at    | -3.13  | -6.74 |                                                                                        |           |
| 221773_at    | -12.19 | -6.74 | ELK3, ETS-domain protein (SRF accessory protein 2)                                     | ELK3      |
| 206924_at    | -11.84 | -6.69 | interleukin 11                                                                         | IL11      |
| 241396_at    | -7.10  | -6.69 | neural precursor cell expressed, developmentally down-regulated 4-like                 | NEDD4L    |
| 233955_x_at  | -12.99 | -6.67 | CXXC finger 5                                                                          | CXXC5     |
| 225407_at    | -6.80  | -6.64 | myelin basic protein                                                                   | MBP       |
| 207176_s_at  | -14.21 | -6.61 | CD80 molecule                                                                          | CD80      |
| 204446_s_at  | -5.80  | -6.59 | arachidonate 5-lipoxygenase                                                            | ALOX5     |
| 1569104_a_at | -2.18  | -6.54 |                                                                                        |           |
| 211434_s_at  | -7.56  | -6.53 | chemokine (C-C motif) receptor-like 2                                                  | CCRL2     |
| 212828_at    | -16.31 | -6.53 | synaptojanin 2                                                                         | SYNJ2     |
| 223340_at    | -9.52  | -6.51 | spastic paraplegia 3A (autosomal dominant)                                             | SPG3A     |
| 225390_s_at  | -12.85 | -6.47 | Kruppel-like factor 13                                                                 | KLF13     |
| 227236_at    | -6.25  | -6.45 | tetraspanin 2                                                                          | TSPAN2    |
| 227367_at    | -5.88  | -6.41 |                                                                                        |           |
| 235916_at    | -8.18  | -6.33 | yippee-like 4 (Drosophila)                                                             | YPEL4     |
| 228620_at    | -13.32 | -6.28 |                                                                                        |           |
| 202435_s_at  | -6.69  | -6.27 |                                                                                        |           |
| 1569149_at   | -20.36 | -6.27 | PDZ and LIM domain 7 (enigma)                                                          | PDLIM7    |
| 58780_s_at   | -9.72  | -6.25 |                                                                                        |           |
| 231283_at    | -5.75  | -6.24 | mannosyl (alpha-1,3-)-glycoprotein beta-1,4-N-acetylglucosaminyltransferase, isozyme A | MGAT4A    |
| 205599_at    | -23.41 | -6.23 | TNF receptor-associated factor 1                                                       | TRAF1     |
| 234994_at    | -6.83  | -6.22 | KIAA1913                                                                               | KIAA1913  |
| 235422_at    | -12.84 | -6.19 |                                                                                        |           |
| 1552564_at   | -2.34  | -6.18 | nudix (nucleoside diphosphate linked moiety X)-type motif 9 pseudogene 1               | NUDT9P1   |
| 232081_at    | -2.35  | -6.16 |                                                                                        |           |
| 228471_at    | -5.99  | -6.08 | ankyrin repeat domain 44                                                               | ANKRD44   |
| 226041_at    | -6.65  | -6.08 |                                                                                        |           |
| 204198_s_at  | -9.26  | -6.06 | runt-related transcription factor 3                                                    | RUNX3     |
| 1553153_at   | -4.17  | -6.01 | ATPase, H <sup>+</sup> transporting, lysosomal 38kDa, V0 subunit d2                    | ATP6V0D2  |
| 234986_at    | -5.77  | -6.00 |                                                                                        |           |
| 213038_at    | -4.61  | -6.00 | IBR domain containing 3                                                                | IBRDC3    |
| 203521_s_at  | -5.41  | -5.99 | zinc finger protein 318                                                                | ZNF318    |
| 226382_at    | -8.12  | -5.98 |                                                                                        |           |

|             |        |       |                                                                                               |          |
|-------------|--------|-------|-----------------------------------------------------------------------------------------------|----------|
| 201502_s_at | -19.82 | -5.96 | nuclear factor of kappa light polypeptide gene enhancer in B-cells inhibitor, alpha           | NFKBIA   |
| 205180_s_at | -7.71  | -5.94 | ADAM metallopeptidase domain 8                                                                | ADAM8    |
| 225239_at   | -15.45 | -5.91 |                                                                                               |          |
| 207986_x_at | -2.93  | -5.91 | cytochrome b-561                                                                              | CYB561   |
| 240232_at   | -3.96  | -5.89 | chromosome 3 open reading frame 1                                                             | C3orf1   |
| 231732_at   | -11.00 | -5.84 | sphingomyelin phosphodiesterase 3, neutral membrane (neutral sphingomyelinase II)             | SMPD3    |
| 227544_at   | -10.30 | -5.81 | chromosome 14 open reading frame 83                                                           | C14orf83 |
| 230499_at   | -9.69  | -5.81 |                                                                                               |          |
| 219256_s_at | -13.77 | -5.80 | SH3 domain and tetratricopeptide repeats 1                                                    | SH3TC1   |
| 228450_at   | -3.01  | -5.80 | pleckstrin homology domain containing, family A member 7                                      | PLEKHA7  |
| 205081_at   | -6.24  | -5.78 | cysteine-rich protein 1 (intestinal)                                                          | CRIP1    |
| 228770_at   | -27.15 | -5.76 | G protein-coupled receptor 146                                                                | GPR146   |
| 217853_at   | -13.94 | -5.74 | tensin 3                                                                                      | TNS3     |
| 222996_s_at | -12.98 | -5.72 | CXXC finger 5                                                                                 | CXXC5    |
| 204197_s_at | -12.08 | -5.71 | runt-related transcription factor 3                                                           | RUNX3    |
| 237753_at   | -4.15  | -5.69 |                                                                                               |          |
| 202627_s_at | -6.32  | -5.68 | serpin peptidase inhibitor, clade E (nexin, plasminogen activator inhibitor type 1), member 1 | SERPINE1 |
| 243894_at   | -24.61 | -5.64 | solute carrier family 41, member 2                                                            | SLC41A2  |
| 218284_at   | -10.79 | -5.62 | SMAD family member 3                                                                          | SMAD3    |
| 235116_at   | -25.32 | -5.59 | TNF receptor-associated factor 1                                                              | TRAF1    |
| 202910_s_at | -23.06 | -5.58 | CD97 molecule                                                                                 | CD97     |
| 226509_at   | -3.10  | -5.56 | zinc finger protein 641                                                                       | ZNF641   |
| 205120_s_at | -7.54  | -5.51 | sarcoglycan, beta (43kDa dystrophin-associated glycoprotein)                                  | SGCB     |
| 225612_s_at | -13.90 | -5.49 | UDP-GlcNAc:betaGal beta-1,3-N-acetylglucosaminyltransferase 5                                 | B3GNT5   |
| 229841_at   | -3.99  | -5.46 | eukaryotic translation initiation factor 2C, 2                                                | EIF2C2   |
| 225971_at   | -5.36  | -5.45 |                                                                                               |          |
| 209959_at   | -6.51  | -5.44 | nuclear receptor subfamily 4, group A, member 3                                               | NR4A3    |
| 225251_at   | -10.21 | -5.43 | RAB24, member RAS oncogene family                                                             | RAB24    |
| 220494_s_at | -9.91  | -5.42 |                                                                                               |          |
| 203556_at   | -13.75 | -5.39 | zinc fingers and homeoboxes 2                                                                 | ZHX2     |
| 202437_s_at | -6.63  | -5.37 | cytochrome P450, family 1, subfamily B, polypeptide 1                                         | CYP1B1   |
| 243767_at   | -2.82  | -5.37 |                                                                                               |          |
| 227314_at   | -9.15  | -5.35 | integrin, alpha 2 (CD49B, alpha 2 subunit of VLA-2 receptor)                                  | ITGA2    |
| 237444_at   | -3.07  | -5.34 |                                                                                               |          |
| 203234_at   | -6.89  | -5.33 | uridine phosphorylase 1                                                                       | UPP1     |
| 238790_at   | -3.72  | -5.32 |                                                                                               |          |
| 203845_at   | -7.44  | -5.32 | p300/CBP-associated factor                                                                    | PCAF     |

|              |        |       |                                                                                                      |          |
|--------------|--------|-------|------------------------------------------------------------------------------------------------------|----------|
| 206552_s_at  | -6.93  | -5.31 | tachykinin, precursor 1 (substance K, substance P, neurokinin 1, neurokinin 2, neuromedin L, neuroki | TAC1     |
| 236125_at    | -3.10  | -5.30 |                                                                                                      |          |
| 217936_at    | -4.32  | -5.30 | Rho GTPase activating protein 5                                                                      | ARHGAP5  |
| 225980_at    | -9.43  | -5.30 | chromosome 14 open reading frame 43                                                                  | C14orf43 |
| 210271_at    | -4.92  | -5.29 | neurogenic differentiation 2                                                                         | NEUROD2  |
| 213361_at    | -7.96  | -5.27 | tudor domain containing 7                                                                            | TDRD7    |
| 1555963_x_at | -2.85  | -5.27 | UDP-GlcNAc:betaGal beta-1,3-N-acetylglucosaminyltransferase 7                                        | B3GNT7   |
| 224990_at    | -8.61  | -5.27 | chromosome 4 open reading frame 34                                                                   | C4orf34  |
| 207072_at    | -80.55 | -5.27 | interleukin 18 receptor accessory protein                                                            | IL18RAP  |
| 223681_s_at  | -3.10  | -5.22 | InaD-like (Drosophila)                                                                               | INADL    |
| 212993_at    | -6.84  | -5.21 |                                                                                                      |          |
| 203232_s_at  | -9.82  | -5.21 | ataxin 1                                                                                             | ATXN1    |
| 241762_at    | -13.00 | -5.19 | F-box protein 32                                                                                     | FBXO32   |
| 226055_at    | -7.87  | -5.18 | arrestin domain containing 2                                                                         | ARRDC2   |
| 218532_s_at  | -5.83  | -5.18 |                                                                                                      |          |
| 207113_s_at  | -5.68  | -5.17 | tumor necrosis factor (TNF superfamily, member 2)                                                    | TNF      |
| 228714_at    | -4.21  | -5.16 |                                                                                                      |          |
| 202191_s_at  | -7.12  | -5.14 | growth arrest-specific 7                                                                             | GAS7     |
| 226748_at    | -14.47 | -5.13 | LysM, putative peptidoglycan-binding, domain containing 2                                            | LYSMD2   |
| 232322_x_at  | -16.44 | -5.11 | START domain containing 10                                                                           | STARD10  |
| 226991_at    | -6.41  | -5.09 | nuclear factor of activated T-cells, cytoplasmic, calcineurin-dependent 2                            | NFATC2   |
| 209723_at    | -5.74  | -5.08 | serpin peptidase inhibitor, clade B (ovalbumin), member 9                                            | SERPINB9 |
| 235299_at    | -7.42  | -5.06 |                                                                                                      |          |
| 242229_at    | -5.26  | -5.05 |                                                                                                      |          |
| 231406_at    | -7.17  | -5.03 |                                                                                                      |          |
| 223674_s_at  | -2.32  | -5.03 | CDC42 small effector 1                                                                               | CDC42SE1 |
| 1556332_at   | -3.74  | -5.03 |                                                                                                      |          |
| 225227_at    | -14.50 | -5.01 |                                                                                                      |          |
| 227792_at    | -6.76  | -4.99 |                                                                                                      |          |
| 213222_at    | -7.95  | -4.97 | phospholipase C, beta 1 (phosphoinositide-specific)                                                  | PLCB1    |
| 230170_at    | -4.75  | -4.97 | oncostatin M                                                                                         | OSM      |
| 230563_at    | -5.27  | -4.97 | RasGEF domain family, member 1A                                                                      | RASGEF1A |
| 209946_at    | -4.28  | -4.97 | vascular endothelial growth factor C                                                                 | VEGFC    |
| 221012_s_at  | -11.51 | -4.96 | tripartite motif-containing 8                                                                        | TRIM8    |
| 244654_at    | -11.50 | -4.95 | myosin IG                                                                                            | MYO1G    |
| 207826_s_at  | -46.53 | -4.95 | inhibitor of DNA binding 3, dominant negative helix-loop-helix protein                               | ID3      |
| 203761_at    | -7.51  | -4.94 | Src-like-adaptor                                                                                     | SLA      |
| 223228_at    | -10.42 | -4.93 | leucine zipper, down-regulated in cancer 1-like                                                      | LDOC1L   |
| 36564_at     | -2.76  | -4.92 | IBR domain containing 3                                                                              | IBRDC3   |



|             |        |       |                                                                                                |          |
|-------------|--------|-------|------------------------------------------------------------------------------------------------|----------|
| 212108_at   | -8.15  | -4.91 | UBX domain containing 8                                                                        | UBXD8    |
| 225628_s_at | -3.12  | -4.90 | myeloid/lymphoid or mixed-lineage leukemia (trithorax homolog, Drosophila); translocated to, 6 | MLLT6    |
| 203851_at   | -5.67  | -4.90 | insulin-like growth factor binding protein 6                                                   | IGFBP6   |
| 202887_s_at | -15.22 | -4.89 | DNA-damage-inducible transcript 4                                                              | DDIT4    |
| 221534_at   | -11.41 | -4.88 | chromosome 11 open reading frame 68                                                            | C11orf68 |
| 244808_at   | -2.06  | -4.88 | GRAM domain containing 1A                                                                      | GRAMD1A  |
| 217650_x_at | -8.50  | -4.86 | ST3 beta-galactoside alpha-2,3-sialyltransferase 2                                             | ST3GAL2  |
| 236293_at   | -4.31  | -4.84 |                                                                                                |          |
| 222061_at   | -2.74  | -4.84 | CD58 molecule                                                                                  | CD58     |
| 206337_at   | -6.97  | -4.84 | chemokine (C-C motif) receptor 7                                                               | CCR7     |
| 205935_at   | -3.85  | -4.82 | forkhead box F1                                                                                | FOXF1    |
| 229691_at   | -12.61 | -4.81 |                                                                                                |          |
| 230741_at   | -4.42  | -4.79 |                                                                                                |          |
| 203927_at   | -11.97 | -4.79 | nuclear factor of kappa light polypeptide gene enhancer in B-cells inhibitor, epsilon          | NFKBIE   |
| 212099_at   | -5.48  | -4.79 | ras homolog gene family, member B                                                              | RHOB     |
| 226504_at   | -7.92  | -4.78 | family with sequence similarity 109, member B                                                  | FAM109B  |
| 202073_at   | -8.83  | -4.78 | optineurin                                                                                     | OPTN     |
| 242635_s_at | -4.79  | -4.76 |                                                                                                |          |
| 205032_at   | -6.39  | -4.76 | integrin, alpha 2 (CD49B, alpha 2 subunit of VLA-2 receptor)                                   | ITGA2    |
| 212642_s_at | -3.91  | -4.76 | human immunodeficiency virus type I enhancer binding protein 2                                 | HIVEP2   |
| 229354_at   | -9.14  | -4.75 | aryl-hydrocarbon receptor repressor                                                            | AHRR     |
| 226438_at   | -8.73  | -4.74 |                                                                                                |          |
| 55081_at    | -6.54  | -4.73 | MICAL-like 1                                                                                   | MICALL1  |
| 210933_s_at | -2.06  | -4.73 | fascin homolog 1, actin-bundling protein (Strongylocentrotus purpuratus)                       | FSCN1    |
| 203320_at   | -11.59 | -4.73 | SH2B adaptor protein 3                                                                         | SH2B3    |
| 227410_at   | -4.70  | -4.70 | family with sequence similarity 43, member A                                                   | FAM43A   |
| 223472_at   | -15.40 | -4.69 | Wolf-Hirschhorn syndrome candidate 1                                                           | WHSC1    |
| 210017_at   | -14.05 | -4.69 | mucosa associated lymphoid tissue lymphoma translocation gene 1                                | MALT1    |
| 202628_s_at | -5.57  | -4.68 | serpin peptidase inhibitor, clade E (nexin, plasminogen activator inhibitor type 1), member 1  | SERPINE1 |
| 214724_at   | -3.52  | -4.66 | DIX domain containing 1                                                                        | DIXDC1   |
| 205346_at   | -3.74  | -4.66 | ST3 beta-galactoside alpha-2,3-sialyltransferase 2                                             | ST3GAL2  |
| 228145_s_at | -9.03  | -4.66 | zinc finger protein 398                                                                        | ZNF398   |
| 1555311_at  | -4.79  | -4.66 |                                                                                                |          |
| 226202_at   | -4.64  | -4.64 | zinc finger protein 398                                                                        | ZNF398   |

|              |        |       |                                                                                                       |         |
|--------------|--------|-------|-------------------------------------------------------------------------------------------------------|---------|
| 238778_at    | -4.65  | -4.64 | membrane protein, palmitoylated 7<br>(MAGUK p55 subfamily member 7)                                   | MPP7    |
| 218764_at    | -6.65  | -4.64 | protein kinase C, eta                                                                                 | PRKCH   |
| 204794_at    | -4.57  | -4.63 | dual specificity phosphatase 2                                                                        | DUSP2   |
| 1555486_a_at | -6.75  | -4.61 |                                                                                                       |         |
| 211067_s_at  | -4.26  | -4.61 | growth arrest-specific 7                                                                              | GAS7    |
| 211113_s_at  | -3.20  | -4.59 | ATP-binding cassette, sub-family G<br>(WHITE), member 1                                               | ABCG1   |
| 223179_at    | -9.39  | -4.59 | yippee-like 3 (Drosophila)                                                                            | YPEL3   |
| 210136_at    | -5.41  | -4.57 | myelin basic protein                                                                                  | MBP     |
| 201005_at    | -2.92  | -4.56 | CD9 molecule                                                                                          | CD9     |
| 227062_at    | -17.66 | -4.56 |                                                                                                       |         |
| 207196_s_at  | -7.49  | -4.55 | TNFAIP3 interacting protein 1                                                                         | TNIP1   |
| 1555689_at   | -11.96 | -4.53 | CD80 molecule                                                                                         | CD80    |
| 204802_at    | -6.27  | -4.53 | Ras-related associated with diabetes                                                                  | RRAD    |
| 230104_s_at  | -6.07  | -4.52 |                                                                                                       |         |
| 203695_s_at  | -4.15  | -4.52 | deafness, autosomal dominant 5                                                                        | DFNA5   |
| 202393_s_at  | -10.08 | -4.51 | Kruppel-like factor 10                                                                                | KLF10   |
| 209124_at    | -4.92  | -4.50 | myeloid differentiation primary<br>response gene (88)                                                 | MYD88   |
| 210041_s_at  | -4.55  | -4.50 | phosphoglucomutase 3                                                                                  | PGM3    |
| 225136_at    | -8.64  | -4.50 | pleckstrin homology domain<br>containing, family A<br>(phosphoinositide binding specific)<br>member 2 | PLEKHA2 |
| 201578_at    | -3.33  | -4.49 | podocalyxin-like                                                                                      | PODXL   |
| 235626_at    | -5.83  | -4.49 | calcium/calmodulin-dependent<br>protein kinase ID                                                     | CAMK1D  |
| 230643_at    | -21.81 | -4.49 | wingless-type MMTV integration site<br>family, member 9A                                              | WNT9A   |
| 235479_at    | -4.05  | -4.48 | cytoplasmic polyadenylation element<br>binding protein 2                                              | CPEB2   |
| 200872_at    | -10.60 | -4.48 | S100 calcium binding protein A10                                                                      | S100A10 |
| 203068_at    | -30.39 | -4.47 | kelch-like 21 (Drosophila)                                                                            | KLHL21  |
| 218699_at    | -4.96  | -4.47 | RAB7, member RAS oncogene<br>family-like 1                                                            | RAB7L1  |
| 212820_at    | -4.24  | -4.46 | Dmx-like 2                                                                                            | DMXL2   |
| 213376_at    | -9.74  | -4.45 | zinc finger and BTB domain<br>containing 1                                                            | ZBTB1   |
| 1558340_at   | -3.16  | -4.45 | DIX domain containing 1                                                                               | DIXDC1  |
| 210258_at    | -4.58  | -4.45 | regulator of G-protein signalling 13                                                                  | RGS13   |
| 207571_x_at  | -6.31  | -4.45 | chromosome 1 open reading frame 38                                                                    | C1orf38 |
| 204790_at    | -5.56  | -4.44 | SMAD family member 7                                                                                  | SMAD7   |
| 239678_at    | -3.87  | -4.44 |                                                                                                       |         |
| 224917_at    | -4.62  | -4.44 | transmembrane protein 49                                                                              | TMEM49  |
| 204088_at    | -4.13  | -4.44 | purinergic receptor P2X, ligand-gated<br>ion channel, 4                                               | P2RX4   |
| 226188_at    | -3.98  | -4.42 |                                                                                                       |         |
| 225604_s_at  | -3.02  | -4.42 | chromosome 9 open reading frame 19                                                                    | C9orf19 |
| 230252_at    | -7.68  | -4.42 | G protein-coupled receptor 92                                                                         | GPR92   |

|              |        |       |                                                                                                      |           |
|--------------|--------|-------|------------------------------------------------------------------------------------------------------|-----------|
| 235276_at    | -3.42  | -4.40 | epithelial stromal interaction 1 (breast)                                                            | EPSTI1    |
| 212124_at    | -7.02  | -4.39 | zinc finger, MIZ-type containing 1                                                                   | ZMIZ1     |
| 211352_s_at  | -3.73  | -4.37 | nuclear receptor coactivator 3                                                                       | NCOA3     |
| 204912_at    | -6.91  | -4.37 | interleukin 10 receptor, alpha                                                                       | IL10RA    |
| 225954_s_at  | -2.14  | -4.37 | midnolin                                                                                             | MIDN      |
| 219695_at    | -2.22  | -4.36 | sphingomyelin phosphodiesterase 3, neutral membrane (neutral sphingomyelinase II)                    | SMPD3     |
| 223159_s_at  | -7.77  | -4.36 | NIMA (never in mitosis gene a)-related kinase 6                                                      | NEK6      |
| 31874_at     | -5.95  | -4.35 | growth arrest-specific 2 like 1                                                                      | GAS2L1    |
| 201473_at    | -8.37  | -4.34 | jun B proto-oncogene                                                                                 | JUNB      |
| 224570_s_at  | -6.85  | -4.33 |                                                                                                      |           |
| 227131_at    | -10.42 | -4.33 | mitogen-activated protein kinase kinase kinase 3                                                     | MAP3K3    |
| 232979_at    | -3.43  | -4.32 |                                                                                                      |           |
| 228257_at    | -2.88  | -4.32 | ankyrin repeat domain 52                                                                             | ANKRD52   |
| 223437_at    | -3.10  | -4.32 | peroxisome proliferator-activated receptor alpha                                                     | PPARA     |
| 212774_at    | -4.98  | -4.32 | zinc finger protein 238                                                                              | ZNF238    |
| 217655_at    | -2.25  | -4.32 | FXVD domain containing ion transport regulator 5                                                     | FXVD5     |
| 1553155_x_at | -2.15  | -4.30 | ATPase, H <sup>+</sup> transporting, lysosomal 38kDa, V0 subunit d2                                  | ATP6V0D2  |
| 203047_at    | -8.23  | -4.30 | serine/threonine kinase 10                                                                           | STK10     |
| 227261_at    | -3.22  | -4.30 | Kruppel-like factor 12                                                                               | KLF12     |
| 222453_at    | -6.74  | -4.30 | cytochrome b reductase 1                                                                             | CYBRD1    |
| 46665_at     | -7.82  | -4.30 | sema domain, immunoglobulin domain (Ig), transmembrane domain (TM) and short cytoplasmic domain, (se | SEMA4C    |
| 208683_at    | -6.32  | -4.29 | calpain 2, (m/II) large subunit                                                                      | CAPN2     |
| 211685_s_at  | -2.59  | -4.29 | neurocalcin delta                                                                                    | NCALD     |
| 200782_at    | -6.61  | -4.28 | annexin A5                                                                                           | ANXA5     |
| 201642_at    | -7.95  | -4.28 | interferon gamma receptor 2 (interferon gamma transducer 1)                                          | IFNGR2    |
| 210117_at    | -7.30  | -4.27 | sperm associated antigen 1                                                                           | SPAG1     |
| 227948_at    | -4.15  | -4.26 | FYVE, RhoGEF and PH domain containing 4                                                              | FGD4      |
| 218368_s_at  | -5.71  | -4.26 | tumor necrosis factor receptor superfamily, member 12A                                               | TNFRSF12A |
| 224571_at    | -10.12 | -4.26 | interferon regulatory factor 2 binding protein 2                                                     | IRF2BP2   |
| 232077_s_at  | -7.04  | -4.25 |                                                                                                      |           |
| 218651_s_at  | -5.23  | -4.25 | La ribonucleoprotein domain family, member 6                                                         | LARP6     |
| 229090_at    | -5.38  | -4.25 |                                                                                                      |           |
| 204672_s_at  | -5.01  | -4.24 | ankyrin repeat domain 6                                                                              | ANKRD6    |
| 228242_at    | -4.59  | -4.23 |                                                                                                      |           |
| 216248_s_at  | -3.85  | -4.22 | nuclear receptor subfamily 4, group A, member 2                                                      | NR4A2     |
| 218404_at    | -12.74 | -4.22 | sorting nexin 10                                                                                     | SNX10     |

|              |        |       |                                                                           |           |
|--------------|--------|-------|---------------------------------------------------------------------------|-----------|
| 225557_at    | -4.04  | -4.21 | AXIN1 up-regulated 1                                                      | AXUD1     |
| 202206_at    | -5.29  | -4.21 | ADP-ribosylation factor-like 4C                                           | ARL4C     |
| 226893_at    | -5.11  | -4.20 |                                                                           |           |
| 212845_at    | -2.69  | -4.19 | sterile alpha motif domain containing 4A                                  | SAMD4A    |
| 229033_s_at  | -8.04  | -4.19 | melanoma associated antigen (mutated) 1                                   | MUM1      |
| 228754_at    | -9.03  | -4.18 | solute carrier family 6 (neurotransmitter transporter, taurine), member 6 | SLC6A6    |
| 203037_s_at  | -4.52  | -4.18 | metastasis suppressor 1                                                   | MTSS1     |
| 205511_at    | -5.16  | -4.18 |                                                                           |           |
| 229391_s_at  | -6.19  | -4.17 |                                                                           |           |
| 204698_at    | -5.73  | -4.17 | interferon stimulated exonuclease gene 20kDa                              | ISG20     |
| 210785_s_at  | -5.25  | -4.16 | chromosome 1 open reading frame 38                                        | C1orf38   |
| 1569150_x_at | -6.45  | -4.15 | PDZ and LIM domain 7 (enigma)                                             | PDLIM7    |
| 225214_at    | -12.92 | -4.15 |                                                                           |           |
| 224923_at    | -6.05  | -4.14 | tetratricopeptide repeat domain 7A                                        | TTC7A     |
| 1554519_at   | -18.91 | -4.14 | CD80 molecule                                                             | CD80      |
| 218223_s_at  | -18.48 | -4.14 | pleckstrin homology domain containing, family O member 1                  | PLEKHO1   |
| 214888_at    | -3.01  | -4.14 | calpain 2, (m/II) large subunit                                           | CAPN2     |
| 235964_x_at  | -4.73  | -4.13 | chromosome 20 open reading frame 118                                      | C20orf118 |
| 212923_s_at  | -6.87  | -4.13 | chromosome 6 open reading frame 145                                       | C6orf145  |
| 212397_at    | -6.67  | -4.12 | radixin                                                                   | RDX       |
| 201964_at    | -4.65  | -4.12 | senataxin                                                                 | SETX      |
| 225922_at    | -4.88  | -4.12 |                                                                           |           |
| 202085_at    | -6.64  | -4.12 | tight junction protein 2 (zona occludens 2)                               | TJP2      |
| 223161_at    | -3.44  | -4.12 | KIAA1147                                                                  | KIAA1147  |
| 209374_s_at  | -11.28 | -4.12 | immunoglobulin heavy constant mu                                          | IGHM      |
| 225176_at    | -4.23  | -4.11 |                                                                           |           |
| 1557036_at   | -3.24  | -4.11 | zinc finger and BTB domain containing 1                                   | ZBTB1     |
| 206600_s_at  | -4.68  | -4.09 | solute carrier family 16, member 5 (monocarboxylic acid transporter 6)    | SLC16A5   |
| 227107_at    | -4.91  | -4.09 |                                                                           |           |
| 224832_at    | -6.39  | -4.08 | dual specificity phosphatase 16                                           | DUSP16    |
| 229396_at    | -7.25  | -4.08 | ovo-like 1(Drosophila)                                                    | OVOL1     |
| 227645_at    | -44.93 | -4.07 | phosphoinositide-3-kinase, regulatory subunit 5, p101                     | PIK3R5    |
| 227609_at    | -5.66  | -4.07 | epithelial stromal interaction 1 (breast)                                 | EPSTI1    |
| 205173_x_at  | -8.66  | -4.07 | CD58 molecule                                                             | CD58      |
| 223514_at    | -4.61  | -4.06 | caspase recruitment domain family, member 11                              | CARD11    |
| 212398_at    | -3.13  | -4.06 | radixin                                                                   | RDX       |
| 202172_at    | -6.52  | -4.06 | vascular endothelial zinc finger 1                                        | VEZF1     |

|             |        |       |                                                                                                      |          |
|-------------|--------|-------|------------------------------------------------------------------------------------------------------|----------|
| 221011_s_at | -2.09  | -4.05 | limb bud and heart development homolog (mouse)                                                       | LBH      |
| 227582_at   | -9.27  | -4.05 |                                                                                                      |          |
| 204622_x_at | -3.93  | -4.05 | nuclear receptor subfamily 4, group A, member 2                                                      | NR4A2    |
| 231202_at   | -3.00  | -4.05 |                                                                                                      |          |
| 223027_at   | -5.46  | -4.04 | sorting nexin 9                                                                                      | SNX9     |
| 236248_x_at | -9.63  | -4.03 |                                                                                                      |          |
| 241824_at   | -2.56  | -4.03 | FOS-like antigen 2                                                                                   | FOSL2    |
| 212817_at   | -4.11  | -4.03 | DnaJ (Hsp40) homolog, subfamily B, member 5                                                          | DNAJB5   |
| 225266_at   | -3.59  | -4.02 | zinc finger protein 652                                                                              | ZNF652   |
| 217997_at   | -3.95  | -4.01 | pleckstrin homology-like domain, family A, member 1                                                  | PHLDA1   |
| 205945_at   | -7.78  | -4.01 | interleukin 6 receptor                                                                               | IL6R     |
| 230047_at   | -4.26  | -4.00 |                                                                                                      |          |
| 226939_at   | -5.59  | -4.00 | cytoplasmic polyadenylation element binding protein 2                                                | CPEB2    |
| 207700_s_at | -3.11  | -3.99 | nuclear receptor coactivator 3                                                                       | NCOA3    |
| 65438_at    | -4.77  | -3.99 | KIAA1609                                                                                             | KIAA1609 |
| 224569_s_at | -8.53  | -3.99 | interferon regulatory factor 2 binding protein 2                                                     | IRF2BP2  |
| 225262_at   | -4.45  | -3.99 | FOS-like antigen 2                                                                                   | FOSL2    |
| 212445_s_at | -3.48  | -3.99 | neural precursor cell expressed, developmentally down-regulated 4-like                               | NEDD4L   |
| 206283_s_at | -5.75  | -3.98 | T-cell acute lymphocytic leukemia 1                                                                  | TAL1     |
| 203741_s_at | -7.02  | -3.97 | adenylate cyclase 7                                                                                  | ADCY7    |
| 228442_at   | -8.34  | -3.96 |                                                                                                      |          |
| 221680_s_at | -3.23  | -3.96 | ets variant gene 7 (TEL2 oncogene)                                                                   | ETV7     |
| 1553349_at  | -2.36  | -3.95 | AT rich interactive domain 2 (ARID, RFX-like)                                                        | ARID2    |
| 205027_s_at | -9.95  | -3.95 | mitogen-activated protein kinase kinase kinase 8                                                     | MAP3K8   |
| 242738_s_at | -3.69  | -3.95 |                                                                                                      |          |
| 203542_s_at | -2.18  | -3.95 | Kruppel-like factor 9                                                                                | KLF9     |
| 207426_s_at | -3.61  | -3.94 | tumor necrosis factor (ligand) superfamily, member 4 (tax-transcriptionally activated glycoprotein 1 | TNFSF4   |
| 207266_x_at | -6.14  | -3.93 | RNA binding motif, single stranded interacting protein 1                                             | RBMS1    |
| 214321_at   | -8.40  | -3.93 | nephroblastoma overexpressed gene                                                                    | NOV      |
| 229543_at   | -7.94  | -3.92 |                                                                                                      |          |
| 221571_at   | -5.74  | -3.91 | TNF receptor-associated factor 3                                                                     | TRAF3    |
| 225803_at   | -6.46  | -3.91 | F-box protein 32                                                                                     | FBXO32   |
| 224566_at   | -7.40  | -3.91 |                                                                                                      |          |
| 203665_at   | -8.60  | -3.91 | heme oxygenase (decycling) 1                                                                         | HMOX1    |
| 225142_at   | -3.03  | -3.91 |                                                                                                      |          |
| 207907_at   | -74.14 | -3.90 | tumor necrosis factor (ligand) superfamily, member 14                                                | TNFSF14  |
| 235079_at   | -2.87  | -3.90 |                                                                                                      |          |

|              |        |       |                                                                                   |          |
|--------------|--------|-------|-----------------------------------------------------------------------------------|----------|
| 203006_at    | -5.65  | -3.89 | inositol polyphosphate-5-phosphatase, 40kDa                                       | INPP5A   |
| 222154_s_at  | -4.65  | -3.89 |                                                                                   |          |
| 232279_at    | -2.56  | -3.89 | PHD finger protein 15                                                             | PHF15    |
| 241416_at    | -8.74  | -3.88 |                                                                                   |          |
| 220985_s_at  | -9.98  | -3.88 | ring finger protein 170                                                           | RNF170   |
| 1565628_at   | -3.90  | -3.87 |                                                                                   |          |
| 229218_at    | -2.46  | -3.87 | collagen, type I, alpha 2                                                         | COL1A2   |
| 1555355_a_at | -3.89  | -3.86 | v-ets erythroblastosis virus E26 oncogene homolog 1 (avian)                       | ETS1     |
| 1554593_s_at | -4.87  | -3.86 | solute carrier family 1 (high affinity aspartate/glutamate transporter), member 6 | SLC1A6   |
| 238327_at    | -5.58  | -3.85 |                                                                                   |          |
| 225618_at    | -9.76  | -3.85 | Rho GTPase activating protein 27                                                  | ARHGAP27 |
| 227697_at    | -14.24 | -3.84 | suppressor of cytokine signaling 3                                                | SOCS3    |
| 227290_at    | -4.29  | -3.84 |                                                                                   |          |
| 221778_at    | -3.01  | -3.83 |                                                                                   |          |
| 227391_x_at  | -10.86 | -3.83 | leucine rich repeat (in FLII) interacting protein 1                               | LRRFIP1  |
| 223092_at    | -3.21  | -3.82 | ankylosis, progressive homolog (mouse)                                            | ANKH     |
| 203879_at    | -5.48  | -3.82 | phosphoinositide-3-kinase, catalytic, delta polypeptide                           | PIK3CD   |
| 206513_at    | -2.43  | -3.81 | absent in melanoma 2                                                              | AIM2     |
| 235094_at    | -5.02  | -3.81 |                                                                                   |          |
| 203839_s_at  | -6.04  | -3.81 | tyrosine kinase, non-receptor, 2                                                  | TNK2     |
| 243356_at    | -3.82  | -3.81 | family with sequence similarity 7, member A1                                      | FAM7A1   |
| 218301_at    | -2.41  | -3.81 | arginyl aminopeptidase (aminopeptidase B)-like 1                                  | RNPEPL1  |
| 212811_x_at  | -6.14  | -3.80 | solute carrier family 1 (glutamate/neutral amino acid transporter), member 4      | SLC1A4   |
| 232693_s_at  | -30.26 | -3.80 | zinc finger protein 395                                                           | ZNF395   |
| 236285_at    | -11.66 | -3.79 |                                                                                   |          |
| 209262_s_at  | -48.24 | -3.78 | nuclear receptor subfamily 2, group F, member 6                                   | NR2F6    |
| 209939_x_at  | -4.77  | -3.78 | CASP8 and FADD-like apoptosis regulator                                           | CFLAR    |
| 209061_at    | -3.86  | -3.78 | nuclear receptor coactivator 3                                                    | NCOA3    |
| 232017_at    | -6.63  | -3.78 | tight junction protein 2 (zona occludens 2)                                       | TJP2     |
| 221753_at    | -3.82  | -3.78 | slingshot homolog 1 (Drosophila)                                                  | SSH1     |
| 1554592_a_at | -10.99 | -3.77 | solute carrier family 1 (high affinity aspartate/glutamate transporter), member 6 | SLC1A6   |
| 220118_at    | -8.98  | -3.76 | zinc finger and BTB domain containing 32                                          | ZBTB32   |
| 204980_at    | -3.33  | -3.76 | clock homolog (mouse)                                                             | CLOCK    |
| 201109_s_at  | -4.38  | -3.76 | thrombospondin 1                                                                  | THBS1    |
| 219278_at    | -5.41  | -3.75 | mitogen-activated protein kinase kinase 6                                         | MAP3K6   |

|             |        |       |                                                                                                 |          |
|-------------|--------|-------|-------------------------------------------------------------------------------------------------|----------|
| 202565_s_at | -6.80  | -3.75 | supervillin                                                                                     | SVIL     |
| 230369_at   | -15.78 | -3.74 | G protein-coupled receptor 161                                                                  | GPR161   |
| 224565_at   | -7.31  | -3.73 |                                                                                                 |          |
| 227112_at   | -3.66  | -3.73 | transmembrane and coiled-coil domain family 1                                                   | TMCC1    |
| 212733_at   | -4.04  | -3.72 | KIAA0226                                                                                        | KIAA0226 |
| 243495_s_at | -5.15  | -3.72 |                                                                                                 |          |
| 207375_s_at | -3.52  | -3.72 | interleukin 15 receptor, alpha                                                                  | IL15RA   |
| 210871_x_at | -3.84  | -3.71 | synovial sarcoma, X breakpoint 2 interacting protein                                            | SSX2IP   |
| 204352_at   | -6.70  | -3.70 | TNF receptor-associated factor 5                                                                | TRAF5    |
| 236685_at   | -3.51  | -3.70 |                                                                                                 |          |
| 231699_at   | -3.40  | -3.70 | nuclear factor of kappa light polypeptide gene enhancer in B-cells inhibitor, alpha             | NFKBIA   |
| 226333_at   | -5.96  | -3.70 |                                                                                                 |          |
| 231697_s_at | -2.44  | -3.68 | transmembrane protein 49                                                                        | TMEM49   |
| 202111_at   | -2.52  | -3.68 | solute carrier family 4, anion exchanger, member 2 (erythrocyte membrane protein band 3-like 1) | SLC4A2   |
| 226039_at   | -3.79  | -3.68 | mannosyl (alpha-1,3-)-glycoprotein beta-1,4-N-acetylglucosaminyltransferase, isozyme A          | MGAT4A   |
| 57715_at    | -5.73  | -3.68 | family with sequence similarity 26, member B                                                    | FAM26B   |
| 243869_at   | -3.83  | -3.68 |                                                                                                 |          |
| 204436_at   | -5.20  | -3.67 | pleckstrin homology domain containing, family Q member 1                                        | PLEKHQ1  |
| 207765_s_at | -14.23 | -3.67 | KIAA1539                                                                                        | KIAA1539 |
| 226155_at   | -3.76  | -3.67 | KIAA1600                                                                                        | KIAA1600 |
| 211744_s_at | -6.23  | -3.67 | CD58 molecule                                                                                   | CD58     |
| 237244_at   | -4.90  | -3.67 |                                                                                                 |          |
| 211178_s_at | -4.47  | -3.66 | proline-serine-threonine phosphatase interacting protein 1                                      | PSTPIP1  |
| 226685_at   | -4.80  | -3.66 | syntrophin, beta 2 (dystrophin-associated protein A1, 59kDa, basic component 2)                 | SNTB2    |
| 231866_at   | -3.28  | -3.66 | leucyl/cystinyl aminopeptidase                                                                  | LNPEP    |
| 201455_s_at | -8.60  | -3.65 | aminopeptidase puromycin sensitive                                                              | NPEPPS   |
| 205590_at   | -9.96  | -3.65 | RAS guanyl releasing protein 1 (calcium and DAG-regulated)                                      | RASGRP1  |
| 213295_at   | -3.60  | -3.65 | cylindromatosis (turban tumor syndrome)                                                         | CYLD     |
| 217538_at   | -4.65  | -3.65 | RUN and TBC1 domain containing 1                                                                | RUTBC1   |
| 235072_s_at | -3.07  | -3.65 |                                                                                                 |          |
| 226460_at   | -5.01  | -3.64 |                                                                                                 |          |
| 226100_at   | -5.84  | -3.64 | myeloid/lymphoid or mixed-lineage leukemia 5 (trithorax homolog, Drosophila)                    | MLL5     |
| 212589_at   | -2.17  | -3.63 | related RAS viral (r-ras) oncogene homolog 2                                                    | RRAS2    |
| 227632_at   | -3.01  | -3.63 | TBC1 domain family, member 24                                                                   | TBC1D24  |

|              |        |       |                                                                                           |          |
|--------------|--------|-------|-------------------------------------------------------------------------------------------|----------|
| 1565599_at   | -2.56  | -3.63 |                                                                                           |          |
| 226673_at    | -4.70  | -3.63 | SH2 domain containing 3C                                                                  | SH2D3C   |
| 1563357_at   | -3.39  | -3.63 |                                                                                           |          |
| 209722_s_at  | -5.27  | -3.62 | serpin peptidase inhibitor, clade B (ovalbumin), member 9                                 | SERPINB9 |
| 239744_at    | -4.18  | -3.62 |                                                                                           |          |
| 220326_s_at  | -10.50 | -3.62 |                                                                                           |          |
| 218641_at    | -2.38  | -3.61 |                                                                                           |          |
| 212062_at    | -3.15  | -3.61 | ATPase, Class II, type 9A                                                                 | ATP9A    |
| 202459_s_at  | -2.92  | -3.61 | lipin 2                                                                                   | LPIN2    |
| 1552295_a_at | -4.26  | -3.61 | solute carrier family 39 (zinc transporter), member 13                                    | SLC39A13 |
| 235844_at    | -3.41  | -3.61 | putative homeodomain transcription factor 1                                               | PHTF1    |
| 227361_at    | -5.58  | -3.61 | heparan sulfate (glucosamine) 3-O-sulfotransferase 3B1                                    | HS3ST3B1 |
| 204401_at    | -7.11  | -3.61 | potassium intermediate/small conductance calcium-activated channel, subfamily N, member 4 | KCNN4    |
| 212441_at    | -3.93  | -3.60 |                                                                                           |          |
| 209409_at    | -7.02  | -3.60 | growth factor receptor-bound protein 10                                                   | GRB10    |
| 226682_at    | -4.59  | -3.59 |                                                                                           |          |
| 201531_at    | -8.53  | -3.58 | zinc finger protein 36, C3H type, homolog (mouse)                                         | ZFP36    |
| 222079_at    | -2.19  | -3.58 |                                                                                           |          |
| 238001_at    | -2.52  | -3.58 | potassium channel tetramerisation domain containing 6                                     | KCTD6    |
| 201189_s_at  | -14.08 | -3.58 | inositol 1,4,5-triphosphate receptor, type 3                                              | ITPR3    |
| 230052_s_at  | -6.44  | -3.58 |                                                                                           |          |
| 230192_at    | -8.44  | -3.58 | tripartite motif-containing 13                                                            | TRIM13   |
| 204495_s_at  | -5.05  | -3.58 | chromosome 15 open reading frame 39                                                       | C15orf39 |
| 204205_at    | -4.16  | -3.57 | apolipoprotein B mRNA editing enzyme, catalytic polypeptide-like 3G                       | APOBEC3G |
| 212810_s_at  | -6.87  | -3.57 | solute carrier family 1 (glutamate/neutral amino acid transporter), member 4              | SLC1A4   |
| 209099_x_at  | -2.84  | -3.57 | jagged 1 (Alagille syndrome)                                                              | JAG1     |
| 238597_at    | -3.01  | -3.57 |                                                                                           |          |
| 235362_at    | -3.91  | -3.56 |                                                                                           |          |
| 225265_at    | -5.22  | -3.56 | RNA binding motif, single stranded interacting protein 1                                  | RBMS1    |
| 218812_s_at  | -7.06  | -3.55 | transmembrane protein 142B                                                                | TMEM142B |
| 225269_s_at  | -4.10  | -3.55 | RNA binding motif, single stranded interacting protein 1                                  | RBMS1    |
| 213590_at    | -2.90  | -3.55 | solute carrier family 16, member 5 (monocarboxylic acid transporter 6)                    | SLC16A5  |
| 226074_at    | -3.82  | -3.54 | protein phosphatase 1M (PP2C domain containing)                                           | PPM1M    |



|              |        |       |                                                                    |          |
|--------------|--------|-------|--------------------------------------------------------------------|----------|
| 217762_s_at  | -2.81  | -3.54 | RAB31, member RAS oncogene family                                  | RAB31    |
| 223164_at    | -4.10  | -3.54 | cerebral cavernous malformation 2                                  | CCM2     |
| 210357_s_at  | -4.89  | -3.54 | spermine oxidase                                                   | SMOX     |
| 229390_at    | -5.13  | -3.54 |                                                                    |          |
| 221718_s_at  | -4.18  | -3.53 | A kinase (PRKA) anchor protein 13                                  | AKAP13   |
| 216834_at    | -6.71  | -3.53 | regulator of G-protein signalling 1                                | RGS1     |
| 226771_at    | -3.31  | -3.53 | ATPase, Class I, type 8B, member 2                                 | ATP8B2   |
| 229393_at    | -2.94  | -3.53 | l(3)mbt-like 3 (Drosophila)                                        | L3MBTL3  |
| 205051_s_at  | -5.71  | -3.53 | v-kit Hardy-Zuckerman 4 feline sarcoma viral oncogene homolog      | KIT      |
| 223484_at    | -44.91 | -3.53 | chromosome 15 open reading frame 48                                | C15orf48 |
| 209824_s_at  | -7.07  | -3.52 | aryl hydrocarbon receptor nuclear translocator-like                | ARNTL    |
| 207643_s_at  | -5.71  | -3.52 | tumor necrosis factor receptor superfamily, member 1A              | TNFRSF1A |
| 215945_s_at  | -13.55 | -3.52 | tripartite motif-containing 2                                      | TRIM2    |
| 202083_s_at  | -3.35  | -3.51 | SEC14-like 1 (S. cerevisiae)                                       | SEC14L1  |
| 200999_s_at  | -6.82  | -3.50 | cytoskeleton-associated protein 4                                  | CKAP4    |
| 209606_at    | -4.10  | -3.50 | pleckstrin homology, Sec7 and coiled-coil domains, binding protein | PSCDBP   |
| 212641_at    | -3.64  | -3.49 | human immunodeficiency virus type I enhancer binding protein 2     | HIVEP2   |
| 226322_at    | -5.27  | -3.49 | transmembrane and tetratricopeptide repeat containing 1            | TMTC1    |
| 235199_at    | -14.79 | -3.49 | ring finger protein 125                                            | RNF125   |
| 232504_at    | -5.10  | -3.49 |                                                                    |          |
| 219806_s_at  | -7.74  | -3.49 | chromosome 11 open reading frame 75                                | C11orf75 |
| 225602_at    | -3.79  | -3.49 | chromosome 9 open reading frame 19                                 | C9orf19  |
| 225416_at    | -4.04  | -3.49 | ring finger protein 12                                             | RNF12    |
| 1569872_a_at | -7.74  | -3.49 |                                                                    |          |
| 238992_at    | -5.41  | -3.48 | polymerase (DNA directed) iota                                     | POLI     |
| 228762_at    | -25.15 | -3.48 | LFNG O-fucosylpeptide 3-beta-N-acetylglucosaminyltransferase       | LFNG     |
| 201169_s_at  | -7.25  | -3.47 | basic helix-loop-helix domain containing, class B, 2               | BHLHB2   |
| 200759_x_at  | -3.02  | -3.47 | nuclear factor (erythroid-derived 2)-like 1                        | NFE2L1   |
| 204689_at    | -5.58  | -3.47 | homeobox, hematopoietically expressed                              | HHEX     |
| 33304_at     | -5.03  | -3.47 | interferon stimulated exonuclease gene 20kDa                       | ISG20    |
| 218421_at    | -4.30  | -3.47 | ceramide kinase                                                    | CERK     |
| 215078_at    | -5.02  | -3.46 | superoxide dismutase 2, mitochondrial                              | SOD2     |
| 1569257_at   | -9.59  | -3.46 | formin-like 1                                                      | FMNL1    |
| 230440_at    | -5.32  | -3.46 | zinc finger protein 469                                            | ZNF469   |
| 204621_s_at  | -3.12  | -3.46 | nuclear receptor subfamily 4, group A, member 2                    | NR4A2    |
| 235521_at    | -2.28  | -3.46 | homeobox A3                                                        | HOXA3    |

|             |        |       |                                                                              |           |
|-------------|--------|-------|------------------------------------------------------------------------------|-----------|
| 226641_at   | -6.15  | -3.45 |                                                                              |           |
| 222858_s_at | -2.17  | -3.45 | dual adaptor of phosphotyrosine and 3-phosphoinositides                      | DAPP1     |
| 230733_at   | -5.23  | -3.45 |                                                                              |           |
| 212543_at   | -4.76  | -3.44 | absent in melanoma 1                                                         | AIM1      |
| 218723_s_at | -12.38 | -3.44 |                                                                              |           |
| 210563_x_at | -5.69  | -3.44 | CASP8 and FADD-like apoptosis regulator                                      | CFLAR     |
| 222101_s_at | -3.19  | -3.44 | dachsous 1 (Drosophila)                                                      | DCHS1     |
| 227761_at   | -2.04  | -3.43 | myosin VA (heavy chain 12, myosin)                                           | MYO5A     |
| 223190_s_at | -3.17  | -3.43 | myeloid/lymphoid or mixed-lineage leukemia 5 (trithorax homolog, Drosophila) | MLL5      |
| 226715_at   | -2.44  | -3.43 | forkhead box K1                                                              | FOKK1     |
| 206672_at   | -6.04  | -3.42 | aquaporin 2 (collecting duct)                                                | AQP2      |
| 202171_at   | -6.33  | -3.42 | vascular endothelial zinc finger 1                                           | VEZF1     |
| 236826_at   | -10.66 | -3.42 | chromosome 9 open reading frame 52                                           | C9orf52   |
| 225232_at   | -4.39  | -3.42 | myotubularin related protein 12                                              | MTMR12    |
| 207091_at   | -6.85  | -3.42 | purinergic receptor P2X, ligand-gated ion channel, 7                         | P2RX7     |
| 239058_at   | -6.45  | -3.42 |                                                                              |           |
| 231963_at   | -4.32  | -3.42 |                                                                              |           |
| 227728_at   | -2.30  | -3.42 |                                                                              |           |
| 233849_s_at | -3.40  | -3.42 | Rho GTPase activating protein 5                                              | ARHGAP5   |
| 204684_at   | -4.71  | -3.40 | neuronal pentraxin I                                                         | NPTX1     |
| 1556064_at  | -8.15  | -3.40 |                                                                              |           |
| 213541_s_at | -4.23  | -3.40 | v-ets erythroblastosis virus E26 oncogene homolog (avian)                    | ERG       |
| 226497_s_at | -3.87  | -3.40 |                                                                              |           |
| 229943_at   | -3.15  | -3.40 | tripartite motif-containing 13                                               | TRIM13    |
| 210845_s_at | -5.44  | -3.39 | plasminogen activator, urokinase receptor                                    | PLAUR     |
| 1566764_at  | -6.28  | -3.38 |                                                                              |           |
| 212122_at   | -3.62  | -3.38 | ras homolog gene family, member Q                                            | RHOQ      |
| 211317_s_at | -3.67  | -3.38 | CASP8 and FADD-like apoptosis regulator                                      | CFLAR     |
| 239213_at   | -6.48  | -3.38 | serpin peptidase inhibitor, clade B (ovalbumin), member 1                    | SERPINB1  |
| 232937_at   | -2.39  | -3.38 |                                                                              |           |
| 225144_at   | -3.92  | -3.37 | bone morphogenetic protein receptor, type II (serine/threonine kinase)       | BMPR2     |
| 212606_at   | -19.02 | -3.37 | WD repeat and FYVE domain containing 3                                       | WDFY3     |
| 209295_at   | -4.05  | -3.37 | tumor necrosis factor receptor superfamily, member 10b                       | TNFRSF10B |
| 229307_at   | -3.46  | -3.36 | ankyrin repeat domain 28                                                     | ANKRD28   |
| 209304_x_at | -5.80  | -3.36 | growth arrest and DNA-damage-inducible, beta                                 | GADD45B   |
| 238725_at   | -4.38  | -3.36 |                                                                              |           |
| 1555977_at  | -4.07  | -3.35 |                                                                              |           |
| 212688_at   | -5.89  | -3.35 | phosphoinositide-3-kinase, catalytic, beta polypeptide                       | PIK3CB    |

|              |        |       |                                                                                  |                   |
|--------------|--------|-------|----------------------------------------------------------------------------------|-------------------|
| 205278_at    | -4.09  | -3.35 | glutamate decarboxylase 1 (brain, 67kDa)                                         | GAD1              |
| 214352_s_at  | -5.61  | -3.35 | v-Ki-ras2 Kirsten rat sarcoma viral oncogene homolog                             | KRAS              |
| 1569703_a_at | -6.60  | -3.35 |                                                                                  |                   |
| 227106_at    | -2.53  | -3.34 |                                                                                  |                   |
| 206127_at    | -23.69 | -3.34 | ELK3, ETS-domain protein (SRF accessory protein 2)                               | ELK3              |
| 209920_at    | -2.64  | -3.34 | bone morphogenetic protein receptor, type II (serine/threonine kinase)           | BMPR2             |
| 237105_at    | -16.47 | -3.33 |                                                                                  |                   |
| 210123_s_at  | -2.62  | -3.33 | cholinergic receptor, nicotinic, alpha 7                                         | CHRNA7            |
| 224704_at    | -3.15  | -3.33 | trinucleotide repeat containing 6A family with sequence similarity 116, member B | TNRC6A<br>FAM116B |
| 229739_s_at  | -3.80  | -3.32 |                                                                                  |                   |
| 201462_at    | -5.28  | -3.32 | secernin 1                                                                       | SCRN1             |
| 212675_s_at  | -4.25  | -3.31 | centrosomal protein 68kDa                                                        | CEP68             |
| 226423_at    | -7.70  | -3.31 | progesterone and adipoQ receptor family member VIII                              | PAQR8             |
| 203574_at    | -4.81  | -3.30 | nuclear factor, interleukin 3 regulated                                          | NFIL3             |
| 204951_at    | -3.47  | -3.30 | ras homolog gene family, member H                                                | RHOH              |
| 214377_s_at  | -6.39  | -3.30 | chymotrypsin-like                                                                | CTRL              |
| 203726_s_at  | -2.97  | -3.30 | laminin, alpha 3                                                                 | LAMA3             |
| 205453_at    | -3.39  | -3.30 | homeobox B2                                                                      | HOXB2             |
| 212308_at    | -2.13  | -3.29 | cytoplasmic linker associated protein 2                                          | CLASP2            |
| 236769_at    | -3.00  | -3.29 |                                                                                  |                   |
| 235670_at    | -6.92  | -3.29 |                                                                                  |                   |
| 201331_s_at  | -5.29  | -3.29 | signal transducer and activator of transcription 6, interleukin-4 induced        | STAT6             |
| 223162_s_at  | -5.72  | -3.28 | KIAA1147                                                                         | KIAA1147          |
| 209610_s_at  | -7.97  | -3.28 | solute carrier family 1 (glutamate/neutral amino acid transporter), member 4     | SLC1A4            |
| 208622_s_at  | -3.16  | -3.28 |                                                                                  |                   |
| 39582_at     | -3.67  | -3.28 | cylindromatosis (turban tumor syndrome)                                          | CYLD              |
| 226240_at    | -6.78  | -3.28 |                                                                                  |                   |
| 210360_s_at  | -2.33  | -3.27 | metastasis suppressor 1                                                          | MTSS1             |
| 1552667_a_at | -3.37  | -3.27 | SH2 domain containing 3C                                                         | SH2D3C            |
| 228032_s_at  | -2.80  | -3.27 |                                                                                  |                   |
| 235048_at    | -4.40  | -3.27 |                                                                                  |                   |
| 201000_at    | -4.59  | -3.26 | alanyl-tRNA synthetase                                                           | AARS              |
| 221752_at    | -8.75  | -3.26 | slingshot homolog 1 (Drosophila)                                                 | SSH1              |
| 213112_s_at  | -3.41  | -3.26 | sequestosome 1                                                                   | SQSTM1            |
| 224739_at    | -4.18  | -3.26 | pim-3 oncogene                                                                   | PIM3              |
| 236104_at    | -6.94  | -3.26 |                                                                                  |                   |
| 201566_x_at  | -2.74  | -3.26 | inhibitor of DNA binding 2, dominant negative helix-loop-helix protein           | ID2               |
| 217529_at    | -6.82  | -3.26 |                                                                                  |                   |
| 209163_at    | -8.00  | -3.26 | cytochrome b-561                                                                 | CYB561            |

|              |        |       |                                                                                                    |           |
|--------------|--------|-------|----------------------------------------------------------------------------------------------------|-----------|
| 225305_at    | -9.00  | -3.26 | solute carrier family 25, member 29                                                                | SLC25A29  |
| 219680_at    | -10.82 | -3.26 | NLR family member X1                                                                               | NLRX1     |
| 204036_at    | -6.83  | -3.25 | endothelial differentiation,<br>lysophosphatidic acid G-protein-<br>coupled receptor, 2            | EDG2      |
| 226075_at    | -7.20  | -3.25 | splA/ryanodine receptor domain and<br>SOCS box containing 1                                        | SPSB1     |
| 221755_at    | -5.95  | -3.25 | EH domain binding protein 1-like 1                                                                 | EHBP1L1   |
| 223366_at    | -3.06  | -3.24 |                                                                                                    |           |
| 217419_x_at  | -2.07  | -3.24 | agrln                                                                                              | AGRIN     |
| 225627_s_at  | -5.13  | -3.24 | cache domain containing 1                                                                          | CACHD1    |
| 209930_s_at  | -11.84 | -3.24 | nuclear factor (erythroid-derived 2),<br>45kDa                                                     | NFE2      |
| 235230_at    | -3.04  | -3.23 |                                                                                                    |           |
| 209403_at    | -6.85  | -3.23 | TBC1 domain family, member 3                                                                       | TBC1D3    |
| 214104_at    | -3.91  | -3.23 | G protein-coupled receptor 161                                                                     | GPR161    |
| 212912_at    | -2.14  | -3.23 | ribosomal protein S6 kinase, 90kDa,<br>polypeptide 2                                               | RPS6KA2   |
| 232155_at    | -4.35  | -3.22 | KIAA1618                                                                                           | KIAA1618  |
| 223950_s_at  | -10.46 | -3.22 | FLYWCH-type zinc finger 1                                                                          | FLYWCH1   |
| 215127_s_at  | -3.71  | -3.22 | RNA binding motif, single stranded<br>interacting protein 1                                        | RBMS1     |
| 220246_at    | -47.19 | -3.22 | calcium/calmodulin-dependent<br>protein kinase ID                                                  | CAMK1D    |
| 212859_x_at  | -5.40  | -3.22 | metallothionein 1E (functional)                                                                    | MT1E      |
| 1553644_at   | -3.72  | -3.22 | chromosome 14 open reading frame<br>49                                                             | C14orf49  |
| 203823_at    | -4.20  | -3.21 | regulator of G-protein signalling 3                                                                | RGS3      |
| 227489_at    | -2.76  | -3.21 | SMAD specific E3 ubiquitin protein<br>ligase 2                                                     | SMURF2    |
| 225128_at    | -3.23  | -3.21 | KDEL (Lys-Asp-Glu-Leu) containing<br>2                                                             | KDEL2     |
| 224764_at    | -7.60  | -3.20 | Rho GTPase activating protein 21                                                                   | ARHGAP21  |
| 243641_at    | -5.34  | -3.20 |                                                                                                    |           |
| 1555938_x_at | -8.89  | -3.20 | vimentin                                                                                           | VIM       |
| 235529_x_at  | -3.39  | -3.20 |                                                                                                    |           |
| 224663_s_at  | -10.21 | -3.20 | cofilin 2 (muscle)                                                                                 | CFL2      |
| 205801_s_at  | -2.85  | -3.20 | RAS guanyl releasing protein 3<br>(calcium and DAG-regulated)                                      | RASGRP3   |
| 226112_at    | -3.99  | -3.20 | sarcoglycan, beta (43kDa dystrophin-<br>associated glycoprotein)                                   | SGCB      |
| 224833_at    | -4.27  | -3.19 | v-ets erythroblastosis virus E26<br>oncogene homolog 1 (avian)                                     | ETS1      |
| 227599_at    | -4.62  | -3.19 | chromosome 3 open reading frame 59                                                                 | C3orf59   |
| 238846_at    | -6.41  | -3.19 | tumor necrosis factor receptor<br>superfamily, member 11a, NFKB<br>activator                       | TNFRSF11A |
| 239442_at    | -2.90  | -3.18 | centrosomal protein 68kDa                                                                          | CEP68     |
| 224793_s_at  | -7.27  | -3.18 | transforming growth factor, beta<br>receptor I (activin A receptor type II-<br>like kinase, 53kDa) | TGFBR1    |

|              |       |       |                                                                      |          |
|--------------|-------|-------|----------------------------------------------------------------------|----------|
| 210094_s_at  | -3.08 | -3.17 | par-3 partitioning defective 3 homolog ( <i>C. elegans</i> )         | PARD3    |
| 202762_at    | -5.95 | -3.17 | Rho-associated, coiled-coil containing protein kinase 2              | ROCK2    |
| 230748_at    | -2.70 | -3.17 |                                                                      |          |
| 226795_at    | -3.66 | -3.17 |                                                                      |          |
| 223322_at    | -7.05 | -3.17 | Ras association (RalGDS/AF-6) domain family 5                        | RASSF5   |
| 226867_at    | -3.59 | -3.17 | DENN/MADD domain containing 4C                                       | DENND4C  |
| 204009_s_at  | -6.24 | -3.16 | v-Ki-ras2 Kirsten rat sarcoma viral oncogene homolog                 | KRAS     |
| 226104_at    | -3.20 | -3.16 |                                                                      |          |
| 205139_s_at  | -2.39 | -3.16 | uronyl-2-sulfotransferase                                            | UST      |
| 212959_s_at  | -5.96 | -3.16 | N-acetylglucosamine-1-phosphate transferase, alpha and beta subunits | GNPTAB   |
| 243601_at    | -3.06 | -3.15 |                                                                      |          |
| 224958_at    | -2.68 | -3.15 | nuclear fragile X mental retardation protein interacting protein 2   | NUFIP2   |
| 209604_s_at  | -3.17 | -3.15 | GATA binding protein 3                                               | GATA3    |
| 224983_at    | -6.37 | -3.15 | scavenger receptor class B, member 2                                 | SCARB2   |
| 1553151_at   | -6.35 | -3.15 | ATPase, H <sup>+</sup> transporting, lysosomal 38kDa, V0 subunit d2  | ATP6V0D2 |
| 212561_at    | -4.00 | -3.14 | RAB6 interacting protein 1                                           | RAB6IP1  |
| 219636_s_at  | -2.25 | -3.14 | armadillo repeat containing 9                                        | ARMC9    |
| 213766_x_at  | -6.02 | -3.14 | guanine nucleotide binding protein (G protein), alpha 11 (Gq class)  | GNA11    |
| 40420_at     | -5.87 | -3.14 | serine/threonine kinase 10                                           | STK10    |
| 206589_at    | -2.85 | -3.13 | growth factor independent 1                                          | GF11     |
| 205569_at    | -3.99 | -3.13 | lysosomal-associated membrane protein 3                              | LAMP3    |
| 226677_at    | -2.93 | -3.13 | zinc finger protein 521                                              | ZNF521   |
| 239376_at    | -3.63 | -3.13 |                                                                      |          |
| 221864_at    | -4.10 | -3.13 |                                                                      |          |
| 204249_s_at  | -2.21 | -3.13 | LIM domain only 2 (rhombotin-like 1)                                 | LMO2     |
| 1555912_at   | -3.10 | -3.13 | ST7 overlapping transcript 1 (antisense non-coding RNA)              | ST7OT1   |
| 230179_at    | -4.52 | -3.12 |                                                                      |          |
| 212660_at    | -6.20 | -3.12 | PHD finger protein 15                                                | PHF15    |
| 209541_at    | -6.21 | -3.12 |                                                                      |          |
| 224466_s_at  | -4.24 | -3.12 | v-maf musculoaponeurotic fibrosarcoma oncogene homolog G (avian)     | MAFG     |
| 201631_s_at  | -6.86 | -3.12 | immediate early response 3                                           | IER3     |
| 229670_at    | -4.64 | -3.12 |                                                                      |          |
| 226959_at    | -3.72 | -3.11 |                                                                      |          |
| 1568638_a_at | -6.81 | -3.11 | indoleamine-pyrrole 2,3 dioxygenase-like 1                           | INDOL1   |
| 241819_at    | -4.59 | -3.11 | tumor necrosis factor (ligand) superfamily, member 8                 | TNFSF8   |
| 202192_s_at  | -7.94 | -3.11 | growth arrest-specific 7                                             | GAS7     |

|             |        |       |                                                                                                      |            |
|-------------|--------|-------|------------------------------------------------------------------------------------------------------|------------|
| 229897_at   | -2.63  | -3.11 | zinc finger protein 641                                                                              | ZNF641     |
| 208890_s_at | -4.01  | -3.11 | plexin B2                                                                                            | PLXNB2     |
| 210758_at   | -4.34  | -3.11 | PC4 and SFRS1 interacting protein 1                                                                  | PSIP1      |
| 209574_s_at | -3.44  | -3.10 | chromosome 18 open reading frame 1                                                                   | C18orf1    |
| 204714_s_at | -2.52  | -3.10 | coagulation factor V (proaccelerin, labile factor)                                                   | F5         |
| 205248_at   | -3.13  | -3.10 | dopey family member 2                                                                                | DOPEY2     |
| 228226_s_at | -2.31  | -3.10 | zinc finger protein 775                                                                              | ZNF775     |
| 201454_s_at | -4.10  | -3.10 | aminopeptidase puromycin sensitive                                                                   | NPEPPS     |
| 222062_at   | -7.06  | -3.10 | interleukin 27 receptor, alpha                                                                       | IL27RA     |
| 212930_at   | -4.34  | -3.09 | ATPase, Ca <sup>++</sup> transporting, plasma membrane 1                                             | ATP2B1     |
| 200758_s_at | -7.91  | -3.09 | nuclear factor (erythroid-derived 2)-like 1                                                          | NFE2L1     |
| 40359_at    | -2.77  | -3.08 | Ras association (RalGDS/AF-6) domain family 7                                                        | RASSF7     |
| 238649_at   | -2.67  | -3.08 | phosphatidylinositol transfer protein, cytoplasmic 1                                                 | PITPNC1    |
| 235857_at   | -3.22  | -3.08 | potassium channel tetramerisation domain containing 11                                               | KCTD11     |
| 228570_at   | -2.57  | -3.08 | BTB (POZ) domain containing 11                                                                       | BTBD11     |
| 204103_at   | -5.20  | -3.08 | chemokine (C-C motif) ligand 4                                                                       | CCL4       |
| 221779_at   | -5.31  | -3.07 | MICAL-like 1                                                                                         | MICALL1    |
| 201651_s_at | -3.58  | -3.07 | protein kinase C and casein kinase substrate in neurons 2                                            | PACSIN2    |
| 227232_at   | -2.73  | -3.07 | Enah/Vasp-like                                                                                       | EVL        |
| 230820_at   | -2.63  | -3.07 | SMAD specific E3 ubiquitin protein ligase 2                                                          | SMURF2     |
| 204472_at   | -6.96  | -3.07 | GTP binding protein overexpressed in skeletal muscle                                                 | GEM        |
| 239752_at   | -7.24  | -3.07 |                                                                                                      |            |
| 202638_s_at | -5.45  | -3.07 | intercellular adhesion molecule 1 (CD54), human rhinovirus receptor                                  | ICAM1      |
| 232615_at   | -2.51  | -3.07 |                                                                                                      |            |
| 235334_at   | -3.05  | -3.06 | ST6 (alpha-N-acetyl-neuraminy1-2,3-beta-galactosyl-1,3)-N-acetylgalactosaminide alpha-2,6-sialyltran | ST6GALNAC3 |
| 222235_s_at | -3.90  | -3.06 |                                                                                                      |            |
| 216979_at   | -5.61  | -3.06 | nuclear receptor subfamily 4, group A, member 3                                                      | NR4A3      |
| 212086_x_at | -2.09  | -3.06 | lamin A/C                                                                                            | LMNA       |
| 225913_at   | -3.23  | -3.05 |                                                                                                      |            |
| 239364_at   | -2.50  | -3.05 | ets variant gene 6 (TEL oncogene)                                                                    | ETV6       |
| 209307_at   | -3.61  | -3.05 |                                                                                                      |            |
| 204420_at   | -18.63 | -3.05 | FOS-like antigen 1                                                                                   | FOSL1      |
| 203887_s_at | -2.56  | -3.05 | thrombomodulin                                                                                       | THBD       |
| 201110_s_at | -6.32  | -3.05 | thrombospondin 1                                                                                     | THBS1      |
| 218017_s_at | -5.65  | -3.04 | heparan-alpha-glucosaminide N-acetyltransferase                                                      | HGSNAT     |
| 238077_at   | -5.01  | -3.04 | potassium channel tetramerisation domain containing 6                                                | KCTD6      |

|              |        |       |                                                                                |          |
|--------------|--------|-------|--------------------------------------------------------------------------------|----------|
| 207075_at    | -5.20  | -3.04 | NLR family, pyrin domain containing 3                                          | NLRP3    |
| 235421_at    | -8.39  | -3.03 |                                                                                |          |
| 203940_s_at  | -3.20  | -3.03 | vasohibin 1                                                                    | VASH1    |
| 238469_at    | -3.42  | -3.03 |                                                                                |          |
| 229733_s_at  | -7.23  | -3.03 |                                                                                |          |
| 219202_at    | -3.65  | -3.03 | rhomboïd 5 homolog 2 (Drosophila)                                              | RHBDF2   |
| 201646_at    | -4.50  | -3.02 | scavenger receptor class B, member 2                                           | SCARB2   |
| 225629_s_at  | -3.79  | -3.02 | zinc finger and BTB domain containing 4                                        | ZBTB4    |
| 236961_at    | -2.47  | -3.02 |                                                                                |          |
| 226265_at    | -4.56  | -3.02 | glutamine and serine rich 1                                                    | QSER1    |
| 208343_s_at  | -23.74 | -3.02 | nuclear receptor subfamily 5, group A, member 2                                | NR5A2    |
| 212818_s_at  | -2.81  | -3.02 | ankyrin repeat and SOCS box-containing 1                                       | ASB1     |
| 215933_s_at  | -8.86  | -3.02 | homeobox, hematopoietically expressed                                          | HHEX     |
| 201865_x_at  | -3.06  | -3.02 |                                                                                |          |
| 1552639_at   | -3.39  | -3.02 | kelch domain containing 7B                                                     | KLHDC7B  |
| 236295_s_at  | -7.54  | -3.01 | NLR family, CARD domain containing 3                                           | NLRC3    |
| 212791_at    | -3.74  | -3.01 |                                                                                |          |
| 243431_at    | -2.05  | -3.01 | BTB (POZ) domain containing 14A                                                | BTBD14A  |
| 235753_at    | -3.24  | -3.01 | homeobox A7                                                                    | HOXA7    |
| 224827_at    | -4.04  | -3.01 | ubiquitin domain containing 2                                                  | UBTD2    |
| 209012_at    | -4.08  | -3.01 | triple functional domain (PTPRF interacting)                                   | TRIO     |
| 201626_at    | -8.44  | -3.01 | insulin induced gene 1                                                         | INSIG1   |
| 216867_s_at  | -3.43  | -3.01 | platelet-derived growth factor alpha polypeptide                               | PDGFA    |
| 230561_s_at  | -3.75  | -3.01 |                                                                                |          |
| 218627_at    | -2.86  | -3.00 |                                                                                |          |
| 225965_at    | -3.00  | -3.00 | DDHD domain containing 1                                                       | DDHD1    |
| 203231_s_at  | -6.01  | -3.00 | ataxin 1                                                                       | ATXN1    |
| 229900_at    | -2.94  | -3.00 | CD109 molecule                                                                 | CD109    |
| 212292_at    | -10.03 | -3.00 | solute carrier family 7 (cationic amino acid transporter, y+ system), member 1 | SLC7A1   |
| 1554544_a_at | -3.97  | -2.99 | myelin basic protein                                                           | MBP      |
| 212830_at    | -3.37  | -2.99 | multiple EGF-like-domains 9                                                    | MEGF9    |
| 1552696_at   | -4.28  | -2.99 | non imprinted in Prader-Willi/Angelman syndrome 1                              | NIPA1    |
| 212735_at    | -5.59  | -2.98 | KIAA0226                                                                       | KIAA0226 |
| 213150_at    | -6.78  | -2.98 | homeobox A10                                                                   | HOXA10   |
| 236892_s_at  | -2.77  | -2.98 |                                                                                |          |
| 1558748_at   | -2.27  | -2.98 |                                                                                |          |
| 238642_at    | -4.20  | -2.98 | ankyrin repeat domain 13 family, member D                                      | ANKRD13D |
| 227346_at    | -3.21  | -2.97 | IKAROS family zinc finger 1 (Ikaros)                                           | IKZF1    |
| 223264_at    | -3.76  | -2.97 | mesoderm development candidate 1                                               | MESDC1   |

|              |        |       |                                                                           |          |
|--------------|--------|-------|---------------------------------------------------------------------------|----------|
| 235109_at    | -2.95  | -2.96 |                                                                           |          |
| 220377_at    | -5.40  | -2.96 | family with sequence similarity 30, member A                              | FAM30A   |
| 212677_s_at  | -3.56  | -2.96 | centrosomal protein 68kDa                                                 | CEP68    |
| 231484_at    | -3.06  | -2.96 |                                                                           |          |
| 226430_at    | -3.59  | -2.96 |                                                                           |          |
| 207574_s_at  | -10.09 | -2.96 | growth arrest and DNA-damage-inducible, beta                              | GADD45B  |
| 212448_at    | -2.19  | -2.95 | neural precursor cell expressed, developmentally down-regulated 4-like    | NEDD4L   |
| 202052_s_at  | -24.29 | -2.94 | retinoic acid induced 14                                                  | RAI14    |
| 225946_at    | -3.25  | -2.94 | Ras association (RalGDS/AF-6) domain family 8                             | RASSF8   |
| 228008_at    | -3.17  | -2.94 |                                                                           |          |
| 60084_at     | -3.72  | -2.94 | cyldromatosis (turban tumor syndrome)                                     | CYLD     |
| 202723_s_at  | -5.48  | -2.94 | forkhead box O1A (rhabdomyosarcoma)                                       | FOXO1A   |
| 226158_at    | -3.41  | -2.94 | kelch-like 24 (Drosophila)                                                | KLHL24   |
| 217897_at    | -2.52  | -2.94 | FXVD domain containing ion transport regulator 6                          | FXVD6    |
| 223358_s_at  | -2.81  | -2.93 |                                                                           |          |
| 219150_s_at  | -2.42  | -2.93 | centaurin, alpha 1                                                        | CENTA1   |
| 216321_s_at  | -3.15  | -2.93 | nuclear receptor subfamily 3, group C, member 1 (glucocorticoid receptor) | NR3C1    |
| 212458_at    | -5.40  | -2.93 | sprouty-related, EVH1 domain containing 2                                 | SPRED2   |
| 235513_at    | -3.37  | -2.93 |                                                                           |          |
| 242586_at    | -2.97  | -2.92 | fibronectin type III and SPRY domain containing 1-like                    | FSD1L    |
| 222605_at    | -6.09  | -2.92 | REST corepressor 3                                                        | RCOR3    |
| 203233_at    | -3.47  | -2.92 | interleukin 4 receptor                                                    | IL4R     |
| 1552343_s_at | -2.55  | -2.92 | phosphodiesterase 7A                                                      | PDE7A    |
| 218157_x_at  | -4.37  | -2.92 | CDC42 small effector 1                                                    | CDC42SE1 |
| 233880_at    | -2.38  | -2.92 | ring finger protein 213                                                   | RNF213   |
| 200704_at    | -5.16  | -2.91 | lipopolysaccharide-induced TNF factor                                     | LITAF    |
| 226545_at    | -2.95  | -2.91 | CD109 molecule                                                            | CD109    |
| 214179_s_at  | -3.57  | -2.90 | nuclear factor (erythroid-derived 2)-like 1                               | NFE2L1   |
| 242277_at    | -3.05  | -2.90 |                                                                           |          |
| 242523_at    | -3.29  | -2.90 |                                                                           |          |
| 226003_at    | -3.72  | -2.90 | kinesin family member 21A                                                 | KIF21A   |
| 228904_at    | -4.30  | -2.90 | homeobox B3                                                               | HOXB3    |
| 213391_at    | -3.89  | -2.90 | dpy-19-like 4 (C. elegans)                                                | DPY19L4  |
| 218880_at    | -5.46  | -2.90 | FOS-like antigen 2                                                        | FOSL2    |
| 242612_at    | -3.29  | -2.90 |                                                                           |          |
| 226961_at    | -5.10  | -2.90 | proline rich 15                                                           | PRR15    |
| 202971_s_at  | -4.06  | -2.90 | dual-specificity tyrosine-(Y)-phosphorylation regulated kinase 2          | DYRK2    |



|              |       |       |                                                                              |          |
|--------------|-------|-------|------------------------------------------------------------------------------|----------|
| 203704_s_at  | -2.62 | -2.90 | ras responsive element binding protein 1                                     | RREB1    |
| 213375_s_at  | -3.15 | -2.90 |                                                                              |          |
| 235252_at    | -5.24 | -2.89 | kinase suppressor of ras 1                                                   | KSR1     |
| 218149_s_at  | -4.38 | -2.89 | zinc finger protein 395                                                      | ZNF395   |
| 238722_x_at  | -6.92 | -2.89 |                                                                              |          |
| 229120_s_at  | -5.88 | -2.89 | CDC42 small effector 1                                                       | CDC42SE1 |
| 228594_at    | -4.70 | -2.89 | chromosome 5 open reading frame 33                                           | C5orf33  |
| 226721_at    | -3.03 | -2.89 | dpy-19-like 4 (C. elegans)                                                   | DPY19L4  |
| 204215_at    | -6.28 | -2.88 | chromosome 7 open reading frame 23                                           | C7orf23  |
| 223189_x_at  | -4.26 | -2.88 | myeloid/lymphoid or mixed-lineage leukemia 5 (trithorax homolog, Drosophila) | MLL5     |
| 200836_s_at  | -3.30 | -2.88 | microtubule-associated protein 4                                             | MAP4     |
| 244286_at    | -3.06 | -2.88 | formin binding protein 1                                                     | FNBP1    |
| 234987_at    | -5.17 | -2.88 |                                                                              |          |
| 1556429_a_at | -2.37 | -2.88 | WD repeat domain 67                                                          | WDR67    |
| 206060_s_at  | -2.85 | -2.88 | protein tyrosine phosphatase, non-receptor type 22 (lymphoid)                | PTPN22   |
| 215248_at    | -3.38 | -2.88 |                                                                              |          |
| 238029_s_at  | -7.05 | -2.87 | solute carrier family 16, member 14 (monocarboxylic acid transporter 14)     | SLC16A14 |
| 201862_s_at  | -3.17 | -2.87 | leucine rich repeat (in FLII) interacting protein 1                          | LRRFIP1  |
| 227811_at    | -2.86 | -2.87 | FYVE, RhoGEF and PH domain containing 3                                      | FGD3     |
| 225789_at    | -3.18 | -2.87 | centaurin, gamma 3                                                           | CENTG3   |
| 219041_s_at  | -8.45 | -2.87 | replication initiator 1                                                      | REPIN1   |
| 228980_at    | -3.71 | -2.87 | ring finger and FYVE-like domain containing 1                                | RFFL     |
| 229336_at    | -6.69 | -2.87 |                                                                              |          |
| 212655_at    | -3.32 | -2.87 | zinc finger, CCHC domain containing 14                                       | ZCCHC14  |
| 235221_at    | -3.27 | -2.87 | cerebellin 3 precursor                                                       | CBLN3    |
| 230604_at    | -2.65 | -2.86 |                                                                              |          |
| 212895_s_at  | -3.34 | -2.86 | active BCR-related gene                                                      | ABR      |
| 240405_at    | -2.53 | -2.86 |                                                                              |          |
| 225048_at    | -2.70 | -2.86 | PHD finger protein 10                                                        | PHF10    |
| 227897_at    | -3.03 | -2.86 | RAP2B, member of RAS oncogene family                                         | RAP2B    |
| 210001_s_at  | -5.65 | -2.86 | suppressor of cytokine signaling 1                                           | SOCS1    |
| 205290_s_at  | -2.45 | -2.86 | bone morphogenetic protein 2                                                 | BMP2     |
| 230003_at    | -3.79 | -2.86 |                                                                              |          |
| 225606_at    | -3.70 | -2.85 | BCL2-like 11 (apoptosis facilitator)                                         | BCL2L11  |
| 223586_at    | -3.01 | -2.85 | aryl hydrocarbon receptor nuclear translocator-like 2                        | ARNTL2   |
| 202284_s_at  | -2.64 | -2.85 | cyclin-dependent kinase inhibitor 1A (p21, Cip1)                             | CDKN1A   |
| 225768_at    | -3.08 | -2.85 | nuclear receptor subfamily 1, group D, member 2                              | NR1D2    |

|              |        |       |                                                                |          |
|--------------|--------|-------|----------------------------------------------------------------|----------|
| 1553768_a_at | -2.33  | -2.85 | discoidin, CUB and LCCL domain containing 1                    | DCBLD1   |
| 228595_at    | -2.16  | -2.84 |                                                                |          |
| 228173_at    | -4.69  | -2.84 | GNAS complex locus                                             | GNAS     |
| 217200_x_at  | -3.68  | -2.84 | cytochrome b-561                                               | CYB561   |
| 244023_at    | -3.22  | -2.84 | spleen tyrosine kinase                                         | SYK      |
| 232424_at    | -6.13  | -2.83 | PR domain containing 16                                        | PRDM16   |
| 213836_s_at  | -3.37  | -2.83 | WD repeat domain, phosphoinositide interacting 1               | WIP1     |
| 229968_at    | -2.51  | -2.83 |                                                                |          |
| 212356_at    | -4.57  | -2.83 | KIAA0323                                                       | KIAA0323 |
| 212239_at    | -2.27  | -2.83 | phosphoinositide-3-kinase, regulatory subunit 1 (p85 alpha)    | PIK3R1   |
| 202460_s_at  | -3.43  | -2.83 | lipin 2                                                        | LPIN2    |
| 212276_at    | -3.24  | -2.83 | lipin 1                                                        | LPIN1    |
| 215285_s_at  | -2.25  | -2.83 | putative homeodomain transcription factor 1                    | PHTF1    |
| 231769_at    | -4.91  | -2.82 | F-box protein 6                                                | FBXO6    |
| 1557049_at   | -2.42  | -2.82 |                                                                |          |
| 225234_at    | -2.59  | -2.82 | Cas-Br-M (murine) ecotropic retroviral transforming sequence   | CBL      |
| 230815_at    | -4.03  | -2.82 |                                                                |          |
| 201627_s_at  | -10.37 | -2.82 | insulin induced gene 1                                         | INSIG1   |
| 220974_x_at  | -2.03  | -2.82 | sideroflexin 3                                                 | SFXN3    |
| 209060_x_at  | -4.27  | -2.82 | nuclear receptor coactivator 3                                 | NCOA3    |
| 225150_s_at  | -5.30  | -2.82 | rhotekin                                                       | RTKN     |
| 226609_at    | -3.36  | -2.82 | discoidin, CUB and LCCL domain containing 1                    | DCBLD1   |
| 241627_x_at  | -4.92  | -2.82 |                                                                |          |
| 239763_at    | -3.32  | -2.82 |                                                                |          |
| 240363_at    | -2.88  | -2.82 | ankyrin 1, erythrocytic                                        | ANK1     |
| 217730_at    | -2.90  | -2.81 | transmembrane BAX inhibitor motif containing 1                 | TMBIM1   |
| 204512_at    | -4.61  | -2.81 | human immunodeficiency virus type I enhancer binding protein 1 | HIVEP1   |
| 235012_at    | -5.24  | -2.81 |                                                                |          |
| 1570259_at   | -2.65  | -2.81 | LIM and senescent cell antigen-like domains 1                  | LIMS1    |
| 223132_s_at  | -7.03  | -2.80 | tripartite motif-containing 8                                  | TRIM8    |
| 217849_s_at  | -16.98 | -2.80 | CDC42 binding protein kinase beta (DMPK-like)                  | CDC42BPB |
| 224762_at    | -4.21  | -2.80 | serine incorporator 2                                          | SERINC2  |
| 213386_at    | -2.26  | -2.80 |                                                                |          |
| 203317_at    | -6.47  | -2.80 | pleckstrin and Sec7 domain containing 4                        | PSD4     |
| 229872_s_at  | -2.65  | -2.80 |                                                                |          |
| 244008_at    | -2.40  | -2.80 |                                                                |          |
| 231175_at    | -2.21  | -2.80 | chromosome 6 open reading frame 65                             | C6orf65  |
| 221830_at    | -3.36  | -2.80 | RAP2A, member of RAS oncogene family                           | RAP2A    |
| 227228_s_at  | -5.12  | -2.80 | KIAA1509                                                       | KIAA1509 |

|              |        |       |                                                                      |          |
|--------------|--------|-------|----------------------------------------------------------------------|----------|
| 225569_at    | -7.86  | -2.80 | eukaryotic translation initiation factor 2C, 2                       | EIF2C2   |
| 231403_at    | -3.06  | -2.80 | triple functional domain (PTPRF interacting)                         | TRIO     |
| 213518_at    | -2.41  | -2.79 | protein kinase C, iota                                               | PRKCI    |
| 1569003_at   | -3.53  | -2.79 | transmembrane protein 49                                             | TMEM49   |
| 241803_s_at  | -2.92  | -2.79 |                                                                      |          |
| 226551_at    | -2.37  | -2.79 | receptor (TNFRSF)-interacting serine-threonine kinase 1              | RIPK1    |
| 225685_at    | -6.40  | -2.79 |                                                                      |          |
| 231579_s_at  | -2.42  | -2.79 | TIMP metalloproteinase inhibitor 2                                   | TIMP2    |
| 225763_at    | -7.18  | -2.79 | RCSD domain containing 1                                             | RCSD1    |
| 231858_x_at  | -5.32  | -2.79 |                                                                      |          |
| 240393_at    | -4.28  | -2.79 | amino-terminal enhancer of split                                     | AES      |
| 203098_at    | -4.98  | -2.78 | chromodomain protein, Y-like                                         | CDYL     |
| 218237_s_at  | -5.89  | -2.78 | solute carrier family 38, member 1                                   | SLC38A1  |
| 228833_s_at  | -4.63  | -2.78 |                                                                      |          |
| 45297_at     | -2.31  | -2.78 | EH-domain containing 2                                               | EHD2     |
| 201426_s_at  | -4.04  | -2.78 | vimentin                                                             | VIM      |
| 225368_at    | -5.01  | -2.78 | homeodomain interacting protein kinase 2                             | HIPK2    |
| 215111_s_at  | -2.40  | -2.77 | TSC22 domain family, member 1                                        | TSC22D1  |
| 1562403_a_at | -16.24 | -2.77 | solute carrier family 8 (sodium-calcium exchanger), member 3         | SLC8A3   |
| 226135_at    | -3.65  | -2.77 | chromosome 6 open reading frame 107                                  | C6orf107 |
| 227502_at    | -3.46  | -2.77 | KIAA1147                                                             | KIAA1147 |
| 201811_x_at  | -3.10  | -2.77 | SH3-domain binding protein 5 (BTK-associated)                        | SH3BP5   |
| 202259_s_at  | -2.78  | -2.77 |                                                                      |          |
| 210427_x_at  | -3.61  | -2.77 | annexin A2                                                           | ANXA2    |
| 216250_s_at  | -4.23  | -2.76 | leupaxin                                                             | LPXN     |
| 204047_s_at  | -2.66  | -2.76 | phosphatase and actin regulator 2                                    | PHACTR2  |
| 231907_at    | -3.14  | -2.76 |                                                                      |          |
| 233539_at    | -2.32  | -2.76 |                                                                      |          |
| 222392_x_at  | -2.44  | -2.76 | PERP, TP53 apoptosis effector                                        | PERP     |
| 226016_at    | -4.04  | -2.76 | CD47 molecule                                                        | CD47     |
| 229011_at    | -26.66 | -2.76 |                                                                      |          |
| 238909_at    | -7.46  | -2.76 | S100 calcium binding protein A10                                     | S100A10  |
| 218845_at    | -3.34  | -2.75 | dual specificity phosphatase 22                                      | DUSP22   |
| 211862_x_at  | -2.96  | -2.75 | CASP8 and FADD-like apoptosis regulator                              | CFLAR    |
| 207971_s_at  | -4.88  | -2.75 | centrosomal protein 68kDa                                            | CEP68    |
| 222891_s_at  | -2.65  | -2.75 | B-cell CLL/lymphoma 11A (zinc finger protein)                        | BCL11A   |
| 218066_at    | -3.05  | -2.75 | solute carrier family 12 (potassium/chloride transporters), member 7 | SLC12A7  |
| 207992_s_at  | -3.00  | -2.75 | adenosine monophosphate deaminase (isoform E)                        | AMPD3    |
| 226392_at    | -2.94  | -2.75 |                                                                      |          |
| 229312_s_at  | -4.22  | -2.75 | G kinase anchoring protein 1                                         | GKAP1    |

|              |        |       |                                                                                   |          |
|--------------|--------|-------|-----------------------------------------------------------------------------------|----------|
| 217437_s_at  | -2.47  | -2.74 | transforming, acidic coiled-coil containing protein 1                             | TACC1    |
| 201590_x_at  | -4.03  | -2.74 | annexin A2                                                                        | ANXA2    |
| 203627_at    | -5.48  | -2.74 | insulin-like growth factor 1 receptor                                             | IGF1R    |
| 1559964_at   | -2.86  | -2.74 |                                                                                   |          |
| 202928_s_at  | -2.12  | -2.74 | PHD finger protein 1                                                              | PHF1     |
| 202922_at    | -2.36  | -2.74 | glutamate-cysteine ligase, catalytic subunit                                      | GCLC     |
| 226249_at    | -20.96 | -2.73 | sorting nexin family member 30                                                    | SNX30    |
| 210665_at    | -4.09  | -2.73 | tissue factor pathway inhibitor (lipoprotein-associated coagulation inhibitor)    | TFPI     |
| 218792_s_at  | -4.77  | -2.73 | B-box and SPRY domain containing                                                  | BSPRY    |
| 202651_at    | -4.05  | -2.72 | lysophosphatidylglycerol acyltransferase 1                                        | LPGAT1   |
| 227984_at    | -16.27 | -2.72 |                                                                                   |          |
| 236471_at    | -3.24  | -2.72 | nuclear factor (erythroid-derived 2)-like 3                                       | NFE2L3   |
| 1555058_a_at | -3.18  | -2.72 | lysophosphatidylglycerol acyltransferase 1                                        | LPGAT1   |
| 222537_s_at  | -5.14  | -2.72 | CDC42 small effector 1                                                            | CDC42SE1 |
| 1555888_at   | -2.30  | -2.72 | E3 ubiquitin protein ligase, HECT domain containing, 1                            | EDD1     |
| 219229_at    | -5.38  | -2.71 | solute carrier organic anion transporter family, member 3A1                       | SLCO3A1  |
| 202101_s_at  | -2.29  | -2.71 | v-ral simian leukemia viral oncogene homolog B (ras related; GTP binding protein) | RALB     |
| 203578_s_at  | -2.06  | -2.71 | transient receptor potential cation channel, subfamily V, member 6                | TRPV6    |
| 219498_s_at  | -2.39  | -2.71 | B-cell CLL/lymphoma 11A (zinc finger protein)                                     | BCL11A   |
| 223227_at    | -2.58  | -2.71 | Bardet-Biedl syndrome 2                                                           | BBS2     |
| 216268_s_at  | -2.62  | -2.71 | jagged 1 (Alagille syndrome)                                                      | JAG1     |
| 226977_at    | -2.76  | -2.71 |                                                                                   |          |
| 228220_at    | -5.10  | -2.71 | FCH domain only 2                                                                 | FCHO2    |
| 222491_at    | -3.68  | -2.71 | heparan-alpha-glucosaminide N-acetyltransferase                                   | HGSNAT   |
| 227388_at    | -9.18  | -2.71 | tumor suppressor candidate 1                                                      | TUSC1    |
| 226125_at    | -2.62  | -2.71 |                                                                                   |          |
| 228557_at    | -5.79  | -2.70 | l(3)mbt-like 4 (Drosophila)                                                       | L3MBTL4  |
| 221695_s_at  | -2.45  | -2.70 | mitogen-activated protein kinase kinase kinase 2                                  | MAP3K2   |
| 218263_s_at  | -4.80  | -2.70 | zinc finger, BED-type containing 5                                                | ZBED5    |
| 228647_at    | -6.32  | -2.70 |                                                                                   |          |
| 238940_at    | -2.63  | -2.70 | Kruppel-like factor 12                                                            | KLF12    |
| 224579_at    | -6.43  | -2.70 | solute carrier family 38, member 1                                                | SLC38A1  |
| 229295_at    | -2.82  | -2.70 |                                                                                   |          |
| 225752_at    | -3.50  | -2.70 | non imprinted in Prader-Willi/Angelman syndrome 1                                 | NIPA1    |
| 205479_s_at  | -3.98  | -2.70 | plasminogen activator, urokinase                                                  | PLAU     |
| 226738_at    | -2.70  | -2.70 | WD repeat domain 81                                                               | WDR81    |
| 230860_at    | -2.31  | -2.70 |                                                                                   |          |

|             |        |       |                                                                         |          |
|-------------|--------|-------|-------------------------------------------------------------------------|----------|
| 244773_at   | -2.29  | -2.69 |                                                                         |          |
| 226040_at   | -2.71  | -2.69 |                                                                         |          |
| 204440_at   | -5.00  | -2.69 | CD83 molecule                                                           | CD83     |
| 202807_s_at | -5.00  | -2.69 | target of myb1 (chicken)                                                | TOM1     |
| 241889_at   | -7.50  | -2.69 |                                                                         |          |
| 221788_at   | -15.69 | -2.69 |                                                                         |          |
| 203822_s_at | -2.77  | -2.69 | E74-like factor 2 (ets domain transcription factor)                     | ELF2     |
| 227534_at   | -6.50  | -2.69 | chromosome 9 open reading frame 21                                      | C9orf21  |
| 224891_at   | -3.11  | -2.69 | forkhead box O3A                                                        | FOXO3A   |
| 229429_x_at | -2.89  | -2.68 |                                                                         |          |
| 242946_at   | -2.69  | -2.68 | CD53 molecule                                                           | CD53     |
| 206636_at   | -8.41  | -2.68 | RAS p21 protein activator 2                                             | RASA2    |
| 242999_at   | -2.08  | -2.68 | Rho guanine nucleotide exchange factor (GEF) 7                          | ARHGEF7  |
| 210839_s_at | -3.38  | -2.68 | ectonucleotide pyrophosphatase/phosphodiesterase 2 (autotaxin)          | ENPP2    |
| 225235_at   | -3.69  | -2.68 | tetraspanin 17                                                          | TPSPAN17 |
| 224558_s_at | -2.42  | -2.68 | metastasis associated lung adenocarcinoma transcript 1 (non-coding RNA) | MALAT1   |
| 225133_at   | -6.29  | -2.68 |                                                                         |          |
| 206675_s_at | -5.31  | -2.68 | SKI-like oncogene                                                       | SKIL     |
| 203094_at   | -3.83  | -2.68 | MAD2L1 binding protein                                                  | MAD2L1BP |
| 225486_at   | -3.35  | -2.67 | AT rich interactive domain 2 (ARID, RFX-like)                           | ARID2    |
| 213293_s_at | -3.19  | -2.67 | tripartite motif-containing 22                                          | TRIM22   |
| 228991_at   | -2.94  | -2.67 |                                                                         |          |
| 203373_at   | -2.88  | -2.67 | suppressor of cytokine signaling 2                                      | SOCS2    |
| 222627_at   | -3.01  | -2.67 | vacuolar protein sorting 54 homolog (S. cerevisiae)                     | VPS54    |
| 203553_s_at | -3.87  | -2.67 | mitogen-activated protein kinase kinase kinase 5                        | MAP4K5   |
| 209164_s_at | -5.35  | -2.67 | cytochrome b-561                                                        | CYB561   |
| 204020_at   | -4.12  | -2.67 | purine-rich element binding protein A                                   | PURA     |
| 212119_at   | -3.58  | -2.67 | ras homolog gene family, member Q                                       | RHOQ     |
| 242794_at   | -3.37  | -2.67 | mastermind-like 3 (Drosophila)                                          | MAML3    |
| 218927_s_at | -3.15  | -2.67 | carbohydrate (chondroitin 4) sulfotransferase 12                        | CHST12   |
| 221122_at   | -4.37  | -2.66 | HRAS-like suppressor 2                                                  | HRASLS2  |
| 212380_at   | -2.12  | -2.66 | KIAA0082                                                                | KIAA0082 |
| 204774_at   | -3.64  | -2.66 | ecotropic viral integration site 2A                                     | EVI2A    |
| 212274_at   | -2.60  | -2.66 | lipin 1                                                                 | LPIN1    |
| 225116_at   | -3.25  | -2.66 | homeodomain interacting protein kinase 2                                | HIPK2    |
| 225970_at   | -2.55  | -2.66 | DDHD domain containing 1                                                | DDHD1    |
| 223125_s_at | -3.11  | -2.66 | chromosome 1 open reading frame 21                                      | C1orf21  |
| 212564_at   | -2.18  | -2.66 | potassium channel tetramerisation domain containing 2                   | KCTD2    |

|              |        |       |                                                                                                                                    |          |
|--------------|--------|-------|------------------------------------------------------------------------------------------------------------------------------------|----------|
| 1557527_at   | -5.16  | -2.66 |                                                                                                                                    |          |
| 204342_at    | -6.10  | -2.66 | solute carrier family 25<br>(mitochondrial carrier; phosphate carrier), member 24                                                  | SLC25A24 |
| 228394_at    | -16.02 | -2.66 | serine/threonine kinase 10                                                                                                         | STK10    |
| 207978_s_at  | -2.57  | -2.66 | nuclear receptor subfamily 4, group A, member 3                                                                                    | NR4A3    |
| 244271_at    | -4.36  | -2.66 |                                                                                                                                    |          |
| 207160_at    | -4.40  | -2.66 | interleukin 12A (natural killer cell stimulatory factor 1, cytotoxic lymphocyte maturation factor 1, aquaporin 2 (collecting duct) | IL12A    |
| 236630_at    | -6.69  | -2.66 |                                                                                                                                    | AQP2     |
| 225490_at    | -2.14  | -2.66 | AT rich interactive domain 2 (ARID, RFX-like)                                                                                      | ARID2    |
| 1554690_a_at | -4.72  | -2.65 | transforming, acidic coiled-coil containing protein 1                                                                              | TACC1    |
| 231875_at    | -6.21  | -2.65 | kinesin family member 21A                                                                                                          | KIF21A   |
| 225385_s_at  | -5.75  | -2.65 | heterogeneous nuclear ribonucleoprotein L-like                                                                                     | HNRPLL   |
| 207996_s_at  | -4.76  | -2.65 | chromosome 18 open reading frame 1                                                                                                 | C18orf1  |
| 225545_at    | -6.25  | -2.65 | eukaryotic elongation factor-2 kinase                                                                                              | EEF2K    |
| 204562_at    | -4.22  | -2.65 | interferon regulatory factor 4                                                                                                     | IRF4     |
| 212468_at    | -2.55  | -2.64 | sperm associated antigen 9                                                                                                         | SPAG9    |
| 201389_at    | -5.82  | -2.64 | integrin, alpha 5 (fibronectin receptor, alpha polypeptide)                                                                        | ITGA5    |
| 236600_at    | -2.24  | -2.64 | spastic paraplegia 20, spartin (Troyer syndrome)                                                                                   | SPG20    |
| 244447_at    | -4.57  | -2.64 |                                                                                                                                    |          |
| 224572_s_at  | -4.23  | -2.64 | interferon regulatory factor 2 binding protein 2                                                                                   | IRF2BP2  |
| 226810_at    | -2.67  | -2.64 |                                                                                                                                    |          |
| 221865_at    | -3.81  | -2.64 | chromosome 9 open reading frame 91                                                                                                 | C9orf91  |
| 1554600_s_at | -3.62  | -2.63 | lamin A/C                                                                                                                          | LMNA     |
| 227514_at    | -6.52  | -2.63 |                                                                                                                                    |          |
| 223967_at    | -3.41  | -2.63 | angiopoietin-like 6                                                                                                                | ANGPTL6  |
| 202082_s_at  | -2.68  | -2.63 | SEC14-like 1 ( <i>S. cerevisiae</i> )                                                                                              | SEC14L1  |
| 204667_at    | -2.66  | -2.63 | forkhead box A1                                                                                                                    | FOXA1    |
| 205345_at    | -3.28  | -2.63 | BRCA1 associated RING domain 1                                                                                                     | BARD1    |
| 203445_s_at  | -2.96  | -2.63 | CTD (carboxy-terminal domain, RNA polymerase II, polypeptide A) small phosphatase 2                                                | CTDSP2   |
| 225386_s_at  | -5.10  | -2.63 | heterogeneous nuclear ribonucleoprotein L-like                                                                                     | HNRPLL   |
| 203955_at    | -5.01  | -2.62 | KIAA0649                                                                                                                           | KIAA0649 |
| 227341_at    | -3.79  | -2.62 | chromosome 10 open reading frame 30                                                                                                | C10orf30 |
| 204063_s_at  | -7.95  | -2.62 | unc-51-like kinase 2 ( <i>C. elegans</i> )                                                                                         | ULK2     |
| 1566766_a_at | -6.00  | -2.62 |                                                                                                                                    |          |
| 236192_at    | -2.74  | -2.62 |                                                                                                                                    |          |
| 243613_at    | -3.96  | -2.62 |                                                                                                                                    |          |
| 219257_s_at  | -8.64  | -2.62 | sphingosine kinase 1                                                                                                               | SPHK1    |

|              |        |       |                                                                                      |          |
|--------------|--------|-------|--------------------------------------------------------------------------------------|----------|
| 202606_s_at  | -3.81  | -2.62 | tousled-like kinase 1                                                                | TLK1     |
| 226676_at    | -3.08  | -2.62 | zinc finger protein 521                                                              | ZNF521   |
| 1555789_s_at | -2.53  | -2.62 | PHD finger protein 23                                                                | PHF23    |
| 213309_at    | -2.23  | -2.62 | phospholipase C-like 2                                                               | PLCL2    |
| 206674_at    | -4.16  | -2.61 | fms-related tyrosine kinase 3                                                        | FLT3     |
| 229101_at    | -3.86  | -2.61 |                                                                                      |          |
| 215047_at    | -2.57  | -2.61 | tripartite motif-containing 58                                                       | TRIM58   |
| 208908_s_at  | -3.37  | -2.61 | calpastatin                                                                          | CAST     |
| 210105_s_at  | -3.00  | -2.61 | FYN oncogene related to SRC, FGR, YES                                                | FYN      |
| 239629_at    | -2.52  | -2.61 | CASP8 and FADD-like apoptosis regulator                                              | CFLAR    |
| 218486_at    | -4.21  | -2.61 | Kruppel-like factor 11                                                               | KLF11    |
| 228899_at    | -5.58  | -2.61 |                                                                                      |          |
| 201960_s_at  | -2.39  | -2.61 | MYC binding protein 2                                                                | MYCBP2   |
| 225330_at    | -6.14  | -2.61 | insulin-like growth factor 1 receptor                                                | IGF1R    |
| 227749_at    | -4.58  | -2.61 |                                                                                      |          |
| 204131_s_at  | -2.84  | -2.61 | forkhead box O3A                                                                     | FOXO3A   |
| 227626_at    | -3.53  | -2.60 | progesterone and adiponectin receptor family member VIII                             | PAQR8    |
| 216942_s_at  | -4.44  | -2.60 | CD58 molecule                                                                        | CD58     |
| 209288_s_at  | -4.60  | -2.60 | CDC42 effector protein (Rho GTPase binding) 3                                        | CDC42EP3 |
| 201367_s_at  | -7.39  | -2.59 | zinc finger protein 36, C3H type-like 2                                              | ZFP36L2  |
| 215427_s_at  | -3.82  | -2.59 | zinc finger, CCHC domain containing 14                                               | ZCCHC14  |
| 222463_s_at  | -7.25  | -2.59 | beta-site APP-cleaving enzyme 1                                                      | BACE1    |
| 217901_at    | -2.30  | -2.59 | desmoglein 2                                                                         | DSG2     |
| 225997_at    | -6.06  | -2.59 | MOB1, Mps One Binder kinase activator-like 1A (yeast)                                | MOBKL1A  |
| 217995_at    | -2.90  | -2.59 | sulfide quinone reductase-like (yeast)                                               | SQRDL    |
| 41113_at     | -3.89  | -2.59 | zinc finger protein 500                                                              | ZNF500   |
| 202688_at    | -2.65  | -2.59 | tumor necrosis factor (ligand) superfamily, member 10                                | TNFSF10  |
| 241879_at    | -9.78  | -2.59 |                                                                                      |          |
| 210999_s_at  | -4.18  | -2.59 | growth factor receptor-bound protein 10                                              | GRB10    |
| 203659_s_at  | -4.33  | -2.59 | tripartite motif-containing 13                                                       | TRIM13   |
| 224880_at    | -3.51  | -2.59 | v-ras simian leukemia viral oncogene homolog A (ras related)                         | RALA     |
| 202956_at    | -2.59  | -2.59 | ADP-ribosylation factor guanine nucleotide-exchange factor 1 (brefeldin A-inhibited) | ARFGEF1  |
| 1553743_at   | -4.22  | -2.59 | family with sequence similarity 119, member A                                        | FAM119A  |
| 213327_s_at  | -2.88  | -2.59 | ubiquitin specific peptidase 12                                                      | USP12    |
| 209678_s_at  | -3.14  | -2.59 | protein kinase C, iota                                                               | PRKCI    |
| 202221_s_at  | -2.68  | -2.58 | E1A binding protein p300                                                             | EP300    |
| 212764_at    | -3.30  | -2.58 |                                                                                      |          |
| 224912_at    | -2.57  | -2.58 | tetratricopeptide repeat domain 7A                                                   | TTC7A    |
| 224481_s_at  | -3.40  | -2.58 | HECT domain containing 1                                                             | HECTD1   |
| 200998_s_at  | -25.42 | -2.58 | cytoskeleton-associated protein 4                                                    | CKAP4    |

|              |       |       |                                                                                              |          |
|--------------|-------|-------|----------------------------------------------------------------------------------------------|----------|
| 225339_at    | -4.79 | -2.58 |                                                                                              |          |
| 218902_at    | -4.54 | -2.58 | Notch homolog 1, translocation-associated (Drosophila)                                       | NOTCH1   |
| 212355_at    | -2.96 | -2.58 | KIAA0323                                                                                     | KIAA0323 |
| 203514_at    | -5.47 | -2.58 | mitogen-activated protein kinase kinase 3                                                    | MAP3K3   |
| 224374_s_at  | -2.89 | -2.58 | elastin microfibril interfacier 2                                                            | EMILIN2  |
| 212761_at    | -2.09 | -2.58 | transcription factor 7-like 2 (T-cell specific, HMG-box)                                     | TCF7L2   |
| 211061_s_at  | -3.36 | -2.58 | mannosyl (alpha-1,6-)-glycoprotein beta-1,2-N-acetylglucosaminyltransferase                  | MGAT2    |
| 242268_at    | -2.63 | -2.57 | CUG triplet repeat, RNA binding protein 2                                                    | CUGBP2   |
| 226447_at    | -2.44 | -2.57 | ash1 (absent, small, or homeotic)-like (Drosophila)                                          | ASH1L    |
| 228954_at    | -2.30 | -2.57 | LysM, putative peptidoglycan-binding, domain containing 4                                    | LYSMD4   |
| 212120_at    | -4.06 | -2.57 | ras homolog gene family, member Q                                                            | RHOQ     |
| 235256_s_at  | -2.27 | -2.57 | galactose mutarotase (aldose 1-epimerase)                                                    | GALM     |
| 213954_at    | -2.96 | -2.57 |                                                                                              |          |
| 218898_at    | -6.94 | -2.57 | family with sequence similarity 57, member A                                                 | FAM57A   |
| 1558143_a_at | -3.66 | -2.57 | BCL2-like 11 (apoptosis facilitator)                                                         | BCL2L11  |
| 207949_s_at  | -3.27 | -2.56 | islet cell autoantigen 1, 69kDa                                                              | ICA1     |
| 213503_x_at  | -3.67 | -2.56 | annexin A2                                                                                   | ANXA2    |
| 211671_s_at  | -2.75 | -2.56 | nuclear receptor subfamily 3, group C, member 1 (glucocorticoid receptor)                    | NR3C1    |
| 229264_at    | -2.54 | -2.56 |                                                                                              |          |
| 225755_at    | -2.66 | -2.56 | kelch domain containing 8B                                                                   | KLHDC8B  |
| 200628_s_at  | -3.05 | -2.56 | tryptophanyl-tRNA synthetase                                                                 | WARS     |
| 242488_at    | -2.05 | -2.56 |                                                                                              |          |
| 200632_s_at  | -2.33 | -2.56 | N-myc downstream regulated gene 1                                                            | NDRG1    |
| 226164_x_at  | -5.32 | -2.56 | family with sequence similarity 80, member B                                                 | FAM80B   |
| 206847_s_at  | -5.10 | -2.55 | homeobox A7                                                                                  | HOXA7    |
| 209286_at    | -3.19 | -2.55 | CDC42 effector protein (Rho GTPase binding) 3                                                | CDC42EP3 |
| 203018_s_at  | -2.18 | -2.55 | synovial sarcoma, X breakpoint 2 interacting protein                                         | SSX2IP   |
| 208816_x_at  | -3.32 | -2.55 | annexin A2 pseudogene 2                                                                      | ANXA2P2  |
| 224800_at    | -2.01 | -2.55 | WD repeat and FYVE domain containing 1                                                       | WDFY1    |
| 227954_at    | -3.05 | -2.55 |                                                                                              |          |
| 238013_at    | -3.83 | -2.55 | pleckstrin homology domain containing, family A (phosphoinositide binding specific) member 2 | PLEKHA2  |
| 226560_at    | -3.72 | -2.54 |                                                                                              |          |
| 218648_at    | -3.51 | -2.54 | CREB regulated transcription coactivator 3                                                   | CRTC3    |



|             |       |       |                                                                                         |          |
|-------------|-------|-------|-----------------------------------------------------------------------------------------|----------|
| 212474_at   | -2.12 | -2.53 | KIAA0241                                                                                | KIAA0241 |
| 202847_at   | -3.47 | -2.53 | phosphoenolpyruvate carboxykinase<br>2 (mitochondrial)                                  | PCK2     |
| 203298_s_at | -2.31 | -2.53 | jumonji, AT rich interactive domain 2                                                   | JARID2   |
| 213142_x_at | -2.67 | -2.53 |                                                                                         |          |
| 213639_s_at | -3.08 | -2.52 | zinc finger protein 500                                                                 | ZNF500   |
| 210512_s_at | -4.27 | -2.52 | vascular endothelial growth factor A                                                    | VEGFA    |
| 203185_at   | -6.00 | -2.52 | Ras association (RalGDS/AF-6)<br>domain family 2                                        | RASSF2   |
| 226793_at   | -4.93 | -2.52 |                                                                                         |          |
| 204994_at   | -3.09 | -2.52 | myxovirus (influenza virus)<br>resistance 2 (mouse)                                     | MX2      |
| 202724_s_at | -3.10 | -2.51 | forkhead box O1A<br>(rhabdomyosarcoma)                                                  | FOXO1A   |
| 235427_at   | -4.83 | -2.51 |                                                                                         |          |
| 209949_at   | -5.15 | -2.51 | neutrophil cytosolic factor 2 (65kDa,<br>chronic granulomatous disease,<br>autosomal 2) | NCF2     |
| 221235_s_at | -4.29 | -2.51 |                                                                                         |          |
| 214596_at   | -2.16 | -2.51 |                                                                                         |          |
| 222982_x_at | -3.58 | -2.51 | solute carrier family 38, member 2                                                      | SLC38A2  |
| 228843_at   | -5.87 | -2.51 |                                                                                         |          |
| 207629_s_at | -5.82 | -2.51 | rho/rac guanine nucleotide exchange<br>factor (GEF) 2                                   | ARHGEF2  |
| 210191_s_at | -3.53 | -2.51 | putative homeodomain transcription<br>factor 1                                          | PHTF1    |
| 223085_at   | -2.61 | -2.51 | ring finger protein 19                                                                  | RNF19    |
| 200813_s_at | -2.98 | -2.50 | platelet-activating factor<br>acetylhydrolase, isoform Ib, alpha<br>subunit 45kDa       | PAFAH1B1 |
| 201548_s_at | -2.54 | -2.50 | jumonji, AT rich interactive domain<br>1B                                               | JARID1B  |
| 209750_at   | -3.58 | -2.50 | nuclear receptor subfamily 1, group<br>D, member 2                                      | NR1D2    |
| 209724_s_at | -2.21 | -2.50 | zinc finger protein 161 homolog<br>(mouse)                                              | ZFP161   |
| 227999_at   | -5.40 | -2.50 | PWWP domain containing 2                                                                | PWWP2    |
| 239979_at   | -3.33 | -2.49 | epithelial stromal interaction 1<br>(breast)                                            | EPSTI1   |
| 227013_at   | -3.10 | -2.49 | LATS, large tumor suppressor,<br>homolog 2 (Drosophila)                                 | LATS2    |
| 235142_at   | -5.95 | -2.49 | zinc finger and BTB domain<br>containing 8                                              | ZBTB8    |
| 226474_at   | -3.04 | -2.49 | NLR family, CARD domain<br>containing 5                                                 | NLRC5    |
| 220924_s_at | -4.69 | -2.49 | solute carrier family 38, member 2                                                      | SLC38A2  |
| 219190_s_at | -3.36 | -2.49 | eukaryotic translation initiation factor<br>2C, 4                                       | EIF2C4   |
| 224336_s_at | -2.81 | -2.49 | dual specificity phosphatase 16                                                         | DUSP16   |
| 202969_at   | -4.30 | -2.49 |                                                                                         |          |
| 209392_at   | -3.36 | -2.49 | ectonucleotide<br>pyrophosphatase/phosphodiesterase 2<br>(autotaxin)                    | ENPP2    |

|             |        |       |                                                                                |         |
|-------------|--------|-------|--------------------------------------------------------------------------------|---------|
| 203217_s_at | -2.07  | -2.49 | ST3 beta-galactoside alpha-2,3-sialyltransferase 5                             | ST3GAL5 |
| 223158_s_at | -6.18  | -2.49 | NIMA (never in mitosis gene a)-related kinase 6                                | NEK6    |
| 226691_at   | -8.61  | -2.49 |                                                                                |         |
| 210214_s_at | -4.20  | -2.48 | bone morphogenetic protein receptor, type II (serine/threonine kinase)         | BMPR2   |
| 209281_s_at | -2.63  | -2.48 | ATPase, Ca <sup>++</sup> transporting, plasma membrane 1                       | ATP2B1  |
| 204194_at   | -2.62  | -2.48 | BTB and CNC homology 1, basic leucine zipper transcription factor 1            | BACH1   |
| 222746_s_at | -3.16  | -2.48 | B-box and SPRY domain containing                                               | BSPRY   |
| 238575_at   | -4.56  | -2.48 | oxysterol binding protein-like 6                                               | OSBPL6  |
| 214486_x_at | -2.97  | -2.48 | CASP8 and FADD-like apoptosis regulator                                        | CFLAR   |
| 204021_s_at | -3.33  | -2.48 | purine-rich element binding protein A                                          | PURA    |
| 226538_at   | -2.69  | -2.47 | mannosidase, alpha, class 2A, member 1                                         | MAN2A1  |
| 236369_at   | -2.33  | -2.47 |                                                                                |         |
| 220095_at   | -4.31  | -2.47 | chromosome 9 open reading frame 39                                             | C9orf39 |
| 201218_at   | -4.47  | -2.47 | C-terminal binding protein 2                                                   | CTBP2   |
| 225527_at   | -3.72  | -2.47 | CCAAT/enhancer binding protein (C/EBP), gamma                                  | CEBPG   |
| 236114_at   | -2.23  | -2.47 |                                                                                |         |
| 201860_s_at | -11.45 | -2.47 | plasminogen activator, tissue                                                  | PLAT    |
| 201354_s_at | -3.45  | -2.47 | bromodomain adjacent to zinc finger domain, 2A                                 | BAZ2A   |
| 202449_s_at | -3.68  | -2.47 | retinoid X receptor, alpha                                                     | RXRA    |
| 218815_s_at | -2.87  | -2.47 | transmembrane protein 51                                                       | TMEM51  |
| 205705_at   | -3.09  | -2.47 | ankyrin repeat domain 26                                                       | ANKRD26 |
| 205038_at   | -2.40  | -2.47 | IKAROS family zinc finger 1 (Ikaros)                                           | IKZF1   |
| 206099_at   | -4.89  | -2.46 | protein kinase C, eta                                                          | PRKCH   |
| 230206_at   | -2.01  | -2.46 | dedicator of cytokinesis 5                                                     | DOCK5   |
| 208309_s_at | -4.37  | -2.46 | mucosa associated lymphoid tissue lymphoma translocation gene 1                | MALT1   |
| 212063_at   | -3.59  | -2.46 | CD44 molecule (Indian blood group)                                             | CD44    |
| 211962_s_at | -5.30  | -2.46 | zinc finger protein 36, C3H type-like 1                                        | ZFP36L1 |
| 210664_s_at | -2.54  | -2.46 | tissue factor pathway inhibitor (lipoprotein-associated coagulation inhibitor) | TFPI    |
| 213191_at   | -4.37  | -2.46 | toll-like receptor adaptor molecule 1                                          | TICAM1  |
| 203378_at   | -2.92  | -2.46 | PCF11, cleavage and polyadenylation factor subunit, homolog (S. cerevisiae)    | PCF11   |
| 203385_at   | -3.14  | -2.46 | diacylglycerol kinase, alpha 80kDa                                             | DGKA    |
| 226299_at   | -2.90  | -2.45 | protein kinase N3                                                              | PKN3    |
| 200911_s_at | -3.52  | -2.45 | transforming, acidic coiled-coil containing protein 1                          | TACC1   |
| 213310_at   | -4.92  | -2.45 |                                                                                |         |

|              |        |       |                                                                                                       |          |
|--------------|--------|-------|-------------------------------------------------------------------------------------------------------|----------|
| 1555978_s_at | -3.62  | -2.45 |                                                                                                       |          |
| 239474_at    | -2.37  | -2.45 |                                                                                                       |          |
| 205366_s_at  | -4.57  | -2.45 | homeobox B6                                                                                           | HOXB6    |
| 217677_at    | -2.43  | -2.45 | pleckstrin homology domain<br>containing, family A<br>(phosphoinositide binding specific)<br>member 2 | PLEKHA2  |
| 238684_at    | -3.95  | -2.45 |                                                                                                       |          |
| 232682_at    | -4.14  | -2.45 | peroxisomal trans-2-enoyl-CoA<br>reductase                                                            | PECR     |
| 201647_s_at  | -2.46  | -2.45 | scavenger receptor class B, member 2                                                                  | SCARB2   |
| 204671_s_at  | -2.84  | -2.45 | ankyrin repeat domain 6                                                                               | ANKRD6   |
| 207836_s_at  | -3.94  | -2.45 | RNA binding protein with multiple<br>splicing                                                         | RBPMS    |
| 212327_at    | -6.23  | -2.45 |                                                                                                       |          |
| 210018_x_at  | -4.30  | -2.44 | mucosa associated lymphoid tissue<br>lymphoma translocation gene 1                                    | MALT1    |
| 225641_at    | -2.04  | -2.44 | MADS box transcription enhancer<br>factor 2, polypeptide D (myocyte<br>enhancer factor 2D)            | MEF2D    |
| 208178_x_at  | -2.11  | -2.44 | triple functional domain (PTPRF<br>interacting)                                                       | TRIO     |
| 223380_s_at  | -3.24  | -2.44 | LATS, large tumor suppressor,<br>homolog 2 (Drosophila)                                               | LATS2    |
| 224204_x_at  | -2.01  | -2.44 | aryl hydrocarbon receptor nuclear<br>translocator-like 2                                              | ARNTL2   |
| 212377_s_at  | -2.13  | -2.44 | Notch homolog 2 (Drosophila)                                                                          | NOTCH2   |
| 201431_s_at  | -3.05  | -2.44 | dihydropyrimidinase-like 3                                                                            | DPYSL3   |
| 209426_s_at  | -2.57  | -2.43 | alpha-methylacyl-CoA racemase                                                                         | AMACR    |
| 211272_s_at  | -24.88 | -2.43 | diacylglycerol kinase, alpha 80kDa                                                                    | DGKA     |
| 209410_s_at  | -3.86  | -2.43 | growth factor receptor-bound protein<br>10                                                            | GRB10    |
| 227067_x_at  | -4.27  | -2.43 | neuroblastoma breakpoint family,<br>member 1                                                          | NBPF1    |
| 234974_at    | -2.41  | -2.43 | galactose mutarotase (aldose 1-<br>epimerase)                                                         | GALM     |
| 37005_at     | -4.19  | -2.43 | neuroblastoma, suppression of<br>tumorigenicity 1                                                     | NBL1     |
| 225306_s_at  | -3.07  | -2.43 | solute carrier family 25, member 29                                                                   | SLC25A29 |
| 212586_at    | -3.32  | -2.43 | calpastatin                                                                                           | CAST     |
| 202084_s_at  | -3.06  | -2.42 | SEC14-like 1 (S. cerevisiae)                                                                          | SEC14L1  |
| 206176_at    | -3.71  | -2.42 | bone morphogenetic protein 6                                                                          | BMP6     |
| 201670_s_at  | -3.74  | -2.42 | myristoylated alanine-rich protein<br>kinase C substrate                                              | MARCKS   |
| 202006_at    | -6.49  | -2.42 | protein tyrosine phosphatase, non-<br>receptor type 12                                                | PTPN12   |
| 227383_at    | -4.51  | -2.42 | family with sequence similarity 91,<br>member A2                                                      | FAM91A2  |
| 1565627_a_at | -2.18  | -2.42 |                                                                                                       |          |
| 203693_s_at  | -2.49  | -2.42 | E2F transcription factor 3                                                                            | E2F3     |
| 207735_at    | -4.18  | -2.42 | ring finger protein 125                                                                               | RNF125   |
| 50221_at     | -9.74  | -2.42 | transcription factor EB                                                                               | TFEB     |

|              |        |       |                                                                              |          |
|--------------|--------|-------|------------------------------------------------------------------------------|----------|
| 201328_at    | -3.45  | -2.42 | v-ets erythroblastosis virus E26 oncogene homolog 2 (avian)                  | ETS2     |
| 225632_s_at  | -4.19  | -2.42 | RAB43, member RAS oncogene family                                            | RAB43    |
| 224641_at    | -2.86  | -2.42 | forty-two-three domain containing 1                                          | FYTDD1   |
| 219905_at    | -2.84  | -2.42 | erythroblast membrane-associated protein (Scianna blood group)               | ERMAP    |
| 204048_s_at  | -2.25  | -2.42 | phosphatase and actin regulator 2                                            | PHACTR2  |
| 244377_at    | -2.41  | -2.42 | solute carrier family 1 (glutamate/neutral amino acid transporter), member 4 | SLC1A4   |
| 235233_s_at  | -2.70  | -2.42 |                                                                              |          |
| 241900_at    | -14.40 | -2.41 |                                                                              |          |
| 205192_at    | -8.06  | -2.41 | mitogen-activated protein kinase kinase kinase 14                            | MAP3K14  |
| 225978_at    | -4.49  | -2.41 |                                                                              |          |
| 239448_at    | -3.82  | -2.41 |                                                                              |          |
| 221223_x_at  | -3.77  | -2.41 | cytokine inducible SH2-containing protein                                    | CISH     |
| 217750_s_at  | -2.33  | -2.41 | ubiquitin-conjugating enzyme E2Z (putative)                                  | UBE2Z    |
| 225005_at    | -2.71  | -2.41 | PHD finger protein 13                                                        | PHF13    |
| 1559584_a_at | -5.88  | -2.41 | chromosome 16 open reading frame 54                                          | C16orf54 |
| 227014_at    | -3.06  | -2.41 | aspartate beta-hydroxylase domain containing 2                               | ASPHD2   |
| 228708_at    | -3.09  | -2.41 |                                                                              |          |
| 204490_s_at  | -4.94  | -2.41 | CD44 molecule (Indian blood group)                                           | CD44     |
| 212602_at    | -2.17  | -2.41 | WD repeat and FYVE domain containing 3                                       | WDFY3    |
| 213940_s_at  | -3.23  | -2.41 | formin binding protein 1                                                     | FNBP1    |
| 212607_at    | -2.58  | -2.40 | v-akt murine thymoma viral oncogene homolog 3 (protein kinase B, gamma)      | AKT3     |
| 201959_s_at  | -2.20  | -2.40 | MYC binding protein 2                                                        | MYCBP2   |
| 203773_x_at  | -3.84  | -2.40 | biliverdin reductase A                                                       | BLVRA    |
| 225827_at    | -3.92  | -2.40 | eukaryotic translation initiation factor 2C, 2                               | EIF2C2   |
| 212948_at    | -2.41  | -2.40 | calmodulin binding transcription activator 2                                 | CAMTA2   |
| 203505_at    | -2.13  | -2.40 | ATP-binding cassette, sub-family A (ABC1), member 1                          | ABCA1    |
| 218229_s_at  | -3.91  | -2.40 | pogo transposable element with KRAB domain                                   | POGK     |
| 238948_at    | -3.13  | -2.40 | transmembrane 9 superfamily member 1                                         | TM9SF1   |
| 205965_at    | -4.30  | -2.40 | basic leucine zipper transcription factor, ATF-like                          | BATF     |
| 226183_at    | -2.04  | -2.40 |                                                                              |          |
| 223216_x_at  | -3.69  | -2.40 | zinc finger protein 395                                                      | ZNF395   |
| 204049_s_at  | -2.25  | -2.40 | phosphatase and actin regulator 2                                            | PHACTR2  |
| 235971_at    | -2.33  | -2.40 |                                                                              |          |
| 222173_s_at  | -3.94  | -2.39 | TBC1 domain family, member 2                                                 | TBC1D2   |

|              |        |       |                                                                                                |         |
|--------------|--------|-------|------------------------------------------------------------------------------------------------|---------|
| 201581_at    | -3.10  | -2.39 | thioredoxin domain containing 13                                                               | TXNDC13 |
| 225701_at    | -2.21  | -2.39 | AT-hook transcription factor                                                                   | AKNA    |
| 201883_s_at  | -3.12  | -2.39 | UDP-Gal:betaGlcNAc beta 1,4-galactosyltransferase, polypeptide 1                               | B4GALT1 |
| 1555781_at   | -3.18  | -2.39 | PQ loop repeat containing 2                                                                    | PQLC2   |
| 224925_at    | -10.25 | -2.39 |                                                                                                |         |
| 225060_at    | -2.56  | -2.39 | low density lipoprotein receptor-related protein 11                                            | LRP11   |
| 1559203_s_at | -2.70  | -2.39 | v-Ki-ras2 Kirsten rat sarcoma viral oncogene homolog                                           | KRAS    |
| 225738_at    | -4.10  | -2.39 | Rap guanine nucleotide exchange factor (GEF) 1                                                 | RAPGEF1 |
| 201945_at    | -20.12 | -2.39 | furin (paired basic amino acid cleaving enzyme)                                                | FURIN   |
| 203820_s_at  | -2.62  | -2.39 | insulin-like growth factor 2 mRNA binding protein 3                                            | IGF2BP3 |
| 230424_at    | -3.11  | -2.39 | chromosome 5 open reading frame 13                                                             | C5orf13 |
| 204489_s_at  | -5.63  | -2.39 | CD44 molecule (Indian blood group)                                                             | CD44    |
| 209561_at    | -2.07  | -2.38 | thrombospondin 3                                                                               | THBS3   |
| 222303_at    | -3.42  | -2.38 |                                                                                                |         |
| 222859_s_at  | -2.41  | -2.38 | dual adaptor of phosphotyrosine and 3-phosphoinositides                                        | DAPP1   |
| 206157_at    | -2.48  | -2.38 | pentraxin-related gene, rapidly induced by IL-1 beta                                           | PTX3    |
| 226251_at    | -2.44  | -2.38 | additional sex combs like 2 (Drosophila)                                                       | ASXL2   |
| 241692_at    | -3.62  | -2.38 |                                                                                                |         |
| 202193_at    | -2.76  | -2.38 | LIM domain kinase 2                                                                            | LIMK2   |
| 202239_at    | -2.53  | -2.38 | poly (ADP-ribose) polymerase family, member 4                                                  | PARP4   |
| 55093_at     | -4.09  | -2.38 |                                                                                                |         |
| 212322_at    | -2.32  | -2.38 | sphingosine-1-phosphate lyase 1                                                                | SGPL1   |
| 211924_s_at  | -9.51  | -2.37 | plasminogen activator, urokinase receptor                                                      | PLAUR   |
| 205702_at    | -5.27  | -2.37 | putative homeodomain transcription factor 1                                                    | PHTF1   |
| 230466_s_at  | -4.57  | -2.37 |                                                                                                |         |
| 202365_at    | -2.25  | -2.37 |                                                                                                |         |
| 244313_at    | -2.15  | -2.37 | complement component (3b/4b) receptor 1 (Knops blood group)                                    | CR1     |
| 212115_at    | -4.32  | -2.37 | hematological and neurological expressed 1-like                                                | HN1L    |
| 212989_at    | -4.19  | -2.37 | transmembrane protein 23                                                                       | TMEM23  |
| 223081_at    | -2.85  | -2.37 | PHD finger protein 23                                                                          | PHF23   |
| 228588_s_at  | -2.37  | -2.37 | ubiquitin-conjugating enzyme E2B (RAD6 homolog)                                                | UBE2B   |
| 226542_at    | -3.00  | -2.37 |                                                                                                |         |
| 224685_at    | -2.80  | -2.37 | myeloid/lymphoid or mixed-lineage leukemia (trithorax homolog, Drosophila); translocated to, 4 | MLLT4   |
| 212860_at    | -2.19  | -2.37 | zinc finger, DHHC-type containing 18                                                           | ZDHHC18 |

|              |       |       |                                                                                  |           |
|--------------|-------|-------|----------------------------------------------------------------------------------|-----------|
| 212372_at    | -4.75 | -2.36 | myosin, heavy chain 10, non-muscle                                               | MYH10     |
| 228258_at    | -4.68 | -2.36 | TBC1 domain family, member 10C                                                   | TBC1D10C  |
| 212473_s_at  | -3.46 | -2.36 | microtubule associated<br>monooxygenase, calponin and LIM<br>domain containing 2 | MICAL2    |
| 204226_at    | -2.50 | -2.36 | staufen, RNA binding protein,<br>homolog 2 (Drosophila)                          | STAU2     |
| 1556590_s_at | -3.90 | -2.36 |                                                                                  |           |
| 225785_at    | -4.61 | -2.36 | receptor accessory protein 3                                                     | REEP3     |
| 209050_s_at  | -5.36 | -2.36 | ral guanine nucleotide dissociation<br>stimulator                                | RALGDS    |
| 241873_at    | -3.59 | -2.36 |                                                                                  |           |
| 214121_x_at  | -2.42 | -2.36 | PDZ and LIM domain 7 (enigma)                                                    | PDLIM7    |
| 218705_s_at  | -2.50 | -2.36 | sorting nexin 24                                                                 | SNX24     |
| 202466_at    | -2.18 | -2.36 | polymerase (DNA directed) sigma                                                  | POLS      |
| 209435_s_at  | -8.40 | -2.36 | rho/rac guanine nucleotide exchange<br>factor (GEF) 2                            | ARHGEF2   |
| 239449_at    | -2.56 | -2.36 | ankylosis, progressive homolog<br>(mouse)                                        | ANKH      |
| 202443_x_at  | -2.40 | -2.36 | Notch homolog 2 (Drosophila)                                                     | NOTCH2    |
| 202880_s_at  | -2.45 | -2.36 | pleckstrin homology, Sec7 and coiled-<br>coil domains 1(cytohesin 1)             | PSCD1     |
| 201861_s_at  | -3.59 | -2.36 | leucine rich repeat (in FLII)<br>interacting protein 1                           | LRRFIP1   |
| 224909_s_at  | -5.65 | -2.36 |                                                                                  |           |
| 202081_at    | -4.47 | -2.36 | immediate early response 2                                                       | IER2      |
| 210870_s_at  | -2.35 | -2.35 | epilepsy, progressive myoclonus type<br>2A, Lafora disease (laforin)             | EPM2A     |
| 220615_s_at  | -4.25 | -2.35 | male sterility domain containing 1                                               | MLSTD1    |
| 209269_s_at  | -2.15 | -2.35 |                                                                                  |           |
| 201250_s_at  | -4.25 | -2.35 | solute carrier family 2 (facilitated<br>glucose transporter), member 1           | SLC2A1    |
| 231815_at    | -2.29 | -2.35 | PHD finger protein 12                                                            | PHF12     |
| 221903_s_at  | -2.39 | -2.35 | cylindromatosis (turban tumor<br>syndrome)                                       | CYLD      |
| 226946_at    | -4.94 | -2.35 | chromosome 5 open reading frame 33                                               | C5orf33   |
| 238451_at    | -5.35 | -2.35 | membrane protein, palmitoylated 7<br>(MAGUK p55 subfamily member 7)              | MPP7      |
| 206669_at    | -8.18 | -2.35 | glutamate decarboxylase 1 (brain,<br>67kDa)                                      | GAD1      |
| 235841_at    | -3.72 | -2.35 |                                                                                  |           |
| 202051_s_at  | -2.31 | -2.34 | zinc finger, MYM-type 4                                                          | ZMYM4     |
| 222409_at    | -2.09 | -2.34 | coronin, actin binding protein, 1C                                               | CORO1C    |
| 218626_at    | -3.59 | -2.34 | eukaryotic translation initiation factor<br>4E nuclear import factor 1           | EIF4ENIF1 |
| 206687_s_at  | -6.26 | -2.34 | protein tyrosine phosphatase, non-<br>receptor type 6                            | PTPN6     |
| 200760_s_at  | -2.26 | -2.34 | ADP-ribosylation-like factor 6<br>interacting protein 5                          | ARL6IP5   |
| 211596_s_at  | -3.63 | -2.34 | leucine-rich repeats and<br>immunoglobulin-like domains 1                        | LRIG1     |
| 225564_at    | -2.30 | -2.34 | spermatogenesis associated 13                                                    | SPATA13   |

|              |        |       |                                                                                                                 |            |
|--------------|--------|-------|-----------------------------------------------------------------------------------------------------------------|------------|
| 235657_at    | -2.59  | -2.34 |                                                                                                                 |            |
| 204038_s_at  | -9.38  | -2.34 | endothelial differentiation,<br>lysophosphatidic acid G-protein-<br>coupled receptor, 2                         | EDG2       |
| 225197_at    | -2.90  | -2.34 | chromosome 16 open reading frame<br>72                                                                          | C16orf72   |
| 208944_at    | -2.21  | -2.34 | transforming growth factor, beta<br>receptor II (70/80kDa)                                                      | TGFBR2     |
| 224765_at    | -3.50  | -2.34 |                                                                                                                 |            |
| 210162_s_at  | -4.22  | -2.34 | nuclear factor of activated T-cells,<br>cytoplasmic, calcineurin-dependent 1                                    | NFATC1     |
| 219344_at    | -13.18 | -2.34 | solute carrier family 29 (nucleoside<br>transporters), member 3                                                 | SLC29A3    |
| 225791_at    | -2.93  | -2.34 | ubiquitin-conjugating enzyme E2F<br>(putative)                                                                  | UBE2F      |
| 226284_at    | -2.82  | -2.34 | zinc finger and BTB domain<br>containing 2                                                                      | ZBTB2      |
| 238015_at    | -3.89  | -2.33 |                                                                                                                 |            |
| 1563772_a_at | -2.28  | -2.33 | laminin, alpha 3                                                                                                | LAMA3      |
| 218175_at    | -3.42  | -2.33 | coiled-coil domain containing 92                                                                                | CCDC92     |
| 227420_at    | -2.15  | -2.33 | tumor necrosis factor, alpha-induced<br>protein 8-like 1                                                        | TNFAIP8L1  |
| 221867_at    | -2.94  | -2.33 |                                                                                                                 |            |
| 241925_x_at  | -2.43  | -2.33 |                                                                                                                 |            |
| 1569346_a_at | -5.15  | -2.33 |                                                                                                                 |            |
| 214163_at    | -2.10  | -2.33 | chromosome 1 open reading frame 41                                                                              | C1orf41    |
| 227539_at    | -2.26  | -2.33 |                                                                                                                 |            |
| 207904_s_at  | -2.77  | -2.33 | leucyl/cystinyl aminopeptidase                                                                                  | LNPEP      |
| 224939_at    | -2.95  | -2.33 |                                                                                                                 |            |
| 204032_at    | -4.87  | -2.33 | breast cancer anti-estrogen resistance<br>3                                                                     | BCAR3      |
| 225446_at    | -2.69  | -2.32 | bromodomain and WD repeat domain<br>containing 1                                                                | BRWD1      |
| 219653_at    | -2.23  | -2.32 | LSM14B, SCD6 homolog B (S.<br>cerevisiae)                                                                       | LSM14B     |
| 242230_at    | -6.16  | -2.32 | ataxin 1                                                                                                        | ATXN1      |
| 229299_at    | -4.16  | -2.32 | chromosome 5 open reading frame 33                                                                              | C5orf33    |
| 209905_at    | -2.15  | -2.32 | homeobox A9                                                                                                     | HOXA9      |
| 221551_x_at  | -3.02  | -2.32 | ST6 (alpha-N-acetyl-neuraminy-2,3-<br>beta-galactosyl-1,3)-N-<br>acetylgalactosaminide alpha-2,6-<br>sialyltran | ST6GALNAC4 |
| 226832_at    | -2.74  | -2.32 |                                                                                                                 |            |
| 207738_s_at  | -2.64  | -2.32 | NCK-associated protein 1                                                                                        | NCKAP1     |
| 214319_at    | -2.56  | -2.32 | furry homolog (Drosophila)                                                                                      | FRY        |
| 232690_at    | -3.52  | -2.32 |                                                                                                                 |            |
| 222777_s_at  | -2.59  | -2.31 | Wolf-Hirschhorn syndrome candidate<br>1                                                                         | WHSC1      |
| 225018_at    | -3.29  | -2.31 | spire homolog 1 (Drosophila)                                                                                    | SPIRE1     |
| 224733_at    | -5.17  | -2.31 | CKLF-like MARVEL transmembrane<br>domain containing 3                                                           | CMTM3      |

|             |        |       |                                                                                           |          |
|-------------|--------|-------|-------------------------------------------------------------------------------------------|----------|
| 214221_at   | -2.32  | -2.31 | Alstrom syndrome 1                                                                        | ALMS1    |
| 203729_at   | -3.58  | -2.31 | epithelial membrane protein 3                                                             | EMP3     |
| 214663_at   | -4.30  | -2.31 | receptor interacting protein kinase 5                                                     | RIPK5    |
| 228062_at   | -4.74  | -2.31 | nucleosome assembly protein 1-like 5                                                      | NAP1L5   |
| 219777_at   | -2.57  | -2.31 | GTPase, IMAP family member 6                                                              | GIMAP6   |
| 212475_at   | -5.83  | -2.31 | KIAA0241                                                                                  | KIAA0241 |
| 207467_x_at | -2.80  | -2.31 | calpastatin                                                                               | CAST     |
| 226219_at   | -5.72  | -2.31 | Rho GTPase activating protein 30                                                          | ARHGAP30 |
| 212689_s_at | -2.86  | -2.30 | jumonji domain containing 1A                                                              | JMJD1A   |
| 221937_at   | -4.37  | -2.30 |                                                                                           |          |
| 203925_at   | -3.93  | -2.30 | glutamate-cysteine ligase, modifier subunit                                               | GCLM     |
| 200952_s_at | -4.15  | -2.30 | cyclin D2                                                                                 | CCND2    |
| 218418_s_at | -2.09  | -2.30 | ankyrin repeat domain 25                                                                  | ANKRD25  |
| 217943_s_at | -4.27  | -2.30 | MAP7 domain containing 1                                                                  | MAP7D1   |
| 218798_at   | -3.71  | -2.30 |                                                                                           |          |
| 1552986_at  | -16.37 | -2.30 |                                                                                           |          |
| 211433_x_at | -2.93  | -2.30 | KIAA1539                                                                                  | KIAA1539 |
| 210252_s_at | -2.54  | -2.30 | MAP-kinase activating death domain                                                        | MADD     |
| 202369_s_at | -2.86  | -2.30 | translocation associated membrane protein 2                                               | TRAM2    |
| 226981_at   | -2.11  | -2.30 | myeloid/lymphoid or mixed-lineage leukemia (trithorax homolog, Drosophila)                | MLL      |
| 1555852_at  | -2.91  | -2.30 | proteasome (prosome, macropain) subunit, beta type, 9 (large multifunctional peptidase 2) | PSMB9    |
| 227020_at   | -2.75  | -2.30 | yippee-like 2 (Drosophila)                                                                | YPEL2    |
| 212267_at   | -2.70  | -2.30 | wings apart-like homolog (Drosophila)                                                     | WAPAL    |
| 226143_at   | -4.52  | -2.30 | retinoic acid induced 1                                                                   | RAI1     |
| 1558801_at  | -2.88  | -2.29 |                                                                                           |          |
| 229908_s_at | -2.00  | -2.29 |                                                                                           |          |
| 241353_s_at | -4.57  | -2.29 |                                                                                           |          |
| 232000_at   | -2.46  | -2.29 | chromosome 9 open reading frame 52                                                        | C9orf52  |
| 210361_s_at | -2.39  | -2.28 | E74-like factor 2 (ets domain transcription factor)                                       | ELF2     |
| 213620_s_at | -3.64  | -2.28 | intercellular adhesion molecule 2                                                         | ICAM2    |
| 204222_s_at | -5.44  | -2.28 | GLI pathogenesis-related 1 (glioma)                                                       | GLIPR1   |
| 221799_at   | -3.55  | -2.28 |                                                                                           |          |
| 216925_s_at | -3.87  | -2.28 | T-cell acute lymphocytic leukemia 1                                                       | TAL1     |
| 230546_at   | -3.57  | -2.28 | vasohibin 1                                                                               | VASH1    |
| 241881_at   | -5.20  | -2.28 | olfactory receptor, family 2, subfamily W, member 3                                       | OR2W3    |
| 204502_at   | -4.57  | -2.28 | SAM domain and HD domain 1                                                                | SAMHD1   |
| 201798_s_at | -7.56  | -2.28 | fer-1-like 3, myoferlin (C. elegans)                                                      | FER1L3   |
| 204254_s_at | -2.20  | -2.28 | vitamin D (1,25- dihydroxyvitamin D3) receptor                                            | VDR      |
| 240449_at   | -4.87  | -2.28 | zinc finger protein 341                                                                   | ZNF341   |
| 222258_s_at | -4.10  | -2.28 | SH3-domain binding protein 4                                                              | SH3BP4   |



|              |        |       |                                                                                   |         |
|--------------|--------|-------|-----------------------------------------------------------------------------------|---------|
| 217894_at    | -2.15  | -2.28 | potassium channel tetramerisation domain containing 3                             | KCTD3   |
| 222108_at    | -3.36  | -2.28 | adhesion molecule with Ig-like domain 2                                           | AMIGO2  |
| 215446_s_at  | -2.42  | -2.27 | lysyl oxidase                                                                     | LOX     |
| 1558522_at   | -2.45  | -2.27 |                                                                                   |         |
| 209420_s_at  | -3.51  | -2.27 | sphingomyelin phosphodiesterase 1, acid lysosomal (acid sphingomyelinase)         | SMPD1   |
| 228551_at    | -4.52  | -2.27 |                                                                                   |         |
| 204527_at    | -3.12  | -2.27 | myosin VA (heavy chain 12, myosin)                                                | MYO5A   |
| 224747_at    | -3.35  | -2.27 | ubiquitin-conjugating enzyme E2Q (putative) 2                                     | UBE2Q2  |
| 203476_at    | -4.64  | -2.27 | trophoblast glycoprotein                                                          | TPBG    |
| 226773_at    | -2.81  | -2.27 |                                                                                   |         |
| 209271_at    | -2.90  | -2.27 | bromodomain PHD finger transcription factor                                       | BPTF    |
| 204481_at    | -2.28  | -2.27 | bromodomain and PHD finger containing, 1                                          | BRPF1   |
| 223580_at    | -3.01  | -2.27 | splA/ryanodine receptor domain and SOCS box containing 2                          | SPSB2   |
| 240458_at    | -2.06  | -2.27 | inositol 1,4,5-triphosphate receptor, type 2                                      | ITPR2   |
| 219892_at    | -3.10  | -2.27 | transmembrane 6 superfamily member 1                                              | TM6SF1  |
| 227470_at    | -5.11  | -2.27 | zinc finger protein 553                                                           | ZNF553  |
| 1556682_s_at | -9.15  | -2.27 |                                                                                   |         |
| 1556471_at   | -2.78  | -2.27 | sex comb on midleg-like 4 (Drosophila)                                            | SCML4   |
| 202419_at    | -2.18  | -2.27 | follicular lymphoma variant translocation 1                                       | FVT1    |
| 202100_at    | -3.63  | -2.27 | v-ral simian leukemia viral oncogene homolog B (ras related; GTP binding protein) | RALB    |
| 225935_at    | -2.93  | -2.27 |                                                                                   |         |
| 225325_at    | -2.38  | -2.27 |                                                                                   |         |
| 236539_at    | -5.36  | -2.27 | protein tyrosine phosphatase, non-receptor type 22 (lymphoid)                     | PTPN22  |
| 219911_s_at  | -5.94  | -2.27 | solute carrier organic anion transporter family, member 4A1                       | SLCO4A1 |
| 225909_at    | -2.23  | -2.27 | zinc finger protein 775                                                           | ZNF775  |
| 235690_at    | -2.12  | -2.27 | zinc finger protein 594                                                           | ZNF594  |
| 1555847_a_at | -10.01 | -2.27 |                                                                                   |         |
| 238622_at    | -3.58  | -2.26 | RAP2B, member of RAS oncogene family                                              | RAP2B   |
| 239680_at    | -2.15  | -2.26 |                                                                                   |         |
| 205013_s_at  | -3.28  | -2.26 | adenosine A2a receptor                                                            | ADORA2A |
| 210039_s_at  | -4.07  | -2.26 | protein kinase C, theta                                                           | PRKCC   |
| 231996_at    | -2.63  | -2.26 |                                                                                   |         |
| 215716_s_at  | -3.19  | -2.26 | ATPase, Ca <sup>++</sup> transporting, plasma membrane 1                          | ATP2B1  |
| 203870_at    | -3.40  | -2.26 | ubiquitin specific peptidase 46                                                   | USP46   |
| 225658_at    | -3.47  | -2.26 |                                                                                   |         |

|              |        |       |                                                                                 |          |
|--------------|--------|-------|---------------------------------------------------------------------------------|----------|
| 210878_s_at  | -2.01  | -2.26 | jumonji domain containing 1B                                                    | JMJD1B   |
| 212463_at    | -2.25  | -2.25 | CD59 molecule, complement regulatory protein                                    | CD59     |
| 64418_at     | -2.42  | -2.25 |                                                                                 |          |
| 201598_s_at  | -2.95  | -2.25 | inositol polyphosphate phosphatase-like 1                                       | INPPL1   |
| 227312_at    | -2.09  | -2.25 | syntrophin, beta 2 (dystrophin-associated protein A1, 59kDa, basic component 2) | SNTB2    |
| 228937_at    | -2.55  | -2.25 | chromosome 13 open reading frame 31                                             | C13orf31 |
| 225999_at    | -3.19  | -2.25 | family with sequence similarity 80, member B                                    | FAM80B   |
| 218363_at    | -2.85  | -2.25 | exonuclease 3'-5' domain-like 2                                                 | EXDL2    |
| 242088_at    | -2.17  | -2.25 | kelch-like 24 (Drosophila)                                                      | KLHL24   |
| 229492_at    | -3.16  | -2.25 | vang-like 1 (van gogh, Drosophila)                                              | VANGL1   |
| 242834_at    | -2.49  | -2.25 |                                                                                 |          |
| 1559117_at   | -31.61 | -2.25 |                                                                                 |          |
| 212486_s_at  | -2.83  | -2.25 |                                                                                 |          |
| 201965_s_at  | -3.53  | -2.24 | senataxin                                                                       | SETX     |
| 222233_s_at  | -3.24  | -2.24 | DNA cross-link repair 1C (PSO2 homolog, <i>S. cerevisiae</i> )                  | DCLRE1C  |
| 229997_at    | -4.88  | -2.24 | vang-like 1 (van gogh, Drosophila)                                              | VANGL1   |
| 237768_x_at  | -2.34  | -2.24 |                                                                                 |          |
| 228677_s_at  | -2.87  | -2.24 |                                                                                 |          |
| 212314_at    | -3.39  | -2.24 |                                                                                 |          |
| 219722_s_at  | -4.55  | -2.24 | glycerophosphodiester phosphodiesterase domain containing 3                     | GDPD3    |
| 201353_s_at  | -3.39  | -2.24 | bromodomain adjacent to zinc finger domain, 2A                                  | BAZ2A    |
| 207318_s_at  | -2.81  | -2.24 | cell division cycle 2-like 5 (cholinesterase-related cell division controller)  | CDC2L5   |
| 222116_s_at  | -4.01  | -2.24 | TBC1 domain family, member 16                                                   | TBC1D16  |
| 213147_at    | -2.46  | -2.24 | homeobox A10                                                                    | HOXA10   |
| 228914_at    | -2.55  | -2.24 |                                                                                 |          |
| 202988_s_at  | -4.26  | -2.24 | regulator of G-protein signalling 1                                             | RGS1     |
| 229344_x_at  | -2.45  | -2.23 | family with sequence similarity 80, member B                                    | FAM80B   |
| 1554414_a_at | -3.19  | -2.23 | oxidative stress induced growth inhibitor family member 2                       | OSGIN2   |
| 1554453_at   | -4.64  | -2.23 | heterogeneous nuclear ribonucleoprotein L-like                                  | HNRPLL   |
| 225711_at    | -3.09  | -2.23 | ADP-ribosylation-like factor 6 interacting protein 6                            | ARL6IP6  |
| 223398_at    | -3.71  | -2.23 | chromosome 9 open reading frame 89                                              | C9orf89  |
| 207761_s_at  | -2.97  | -2.23 | methyltransferase like 7A                                                       | METTL7A  |
| 220416_at    | -4.11  | -2.23 | ATPase, Class I, type 8B, member 4                                              | ATP8B4   |
| 60471_at     | -8.06  | -2.22 | Ras and Rab interactor 3                                                        | RIN3     |
| 229785_at    | -4.49  | -2.22 | KRIT1, ankyrin repeat containing                                                | KRIT1    |
| 243444_at    | -2.71  | -2.22 |                                                                                 |          |

|              |        |       |                                                                                              |          |
|--------------|--------|-------|----------------------------------------------------------------------------------------------|----------|
| 219330_at    | -4.85  | -2.22 | vang-like 1 (van gogh, Drosophila)                                                           | VANGL1   |
| 223961_s_at  | -75.34 | -2.22 | cytokine inducible SH2-containing protein                                                    | CISH     |
| 229373_at    | -10.34 | -2.22 |                                                                                              |          |
| 209835_x_at  | -4.53  | -2.22 | CD44 molecule (Indian blood group)                                                           | CD44     |
| 1555920_at   | -5.39  | -2.22 | chromobox homolog 3 (HP1 gamma homolog, Drosophila)                                          | CBX3     |
| 212711_at    | -2.62  | -2.22 | calmodulin regulated spectrin-associated protein 1                                           | CAMSAP1  |
| 244783_at    | -2.35  | -2.22 | YY1 associated factor 2                                                                      | YAF2     |
| 201645_at    | -5.98  | -2.22 | tenascin C (hexabrachion)                                                                    | TNC      |
| 220992_s_at  | -2.05  | -2.22 | chromosome 1 open reading frame 25                                                           | C1orf25  |
| 221983_at    | -3.03  | -2.22 | chromosome 2 open reading frame 17                                                           | C2orf17  |
| 218700_s_at  | -2.93  | -2.22 | RAB7, member RAS oncogene family-like 1                                                      | RAB7L1   |
| 1556950_s_at | -2.66  | -2.22 | serpin peptidase inhibitor, clade B (ovalbumin), member 6                                    | SERPINB6 |
| 219394_at    | -2.93  | -2.21 | phosphatidylglycerophosphate synthase 1                                                      | PGS1     |
| 232884_s_at  | -2.65  | -2.21 |                                                                                              |          |
| 213983_s_at  | -2.08  | -2.21 |                                                                                              |          |
| 210233_at    | -2.34  | -2.21 | interleukin 1 receptor accessory protein                                                     | IL1RAP   |
| 214657_s_at  | -3.33  | -2.21 |                                                                                              |          |
| 242157_at    | -3.21  | -2.21 | chromodomain helicase DNA binding protein 9                                                  | CHD9     |
| 222294_s_at  | -2.51  | -2.21 | RAB27A, member RAS oncogene family                                                           | RAB27A   |
| 206510_at    | -4.06  | -2.21 | sine oculis homeobox homolog 2 (Drosophila)                                                  | SIX2     |
| 242366_at    | -3.22  | -2.21 |                                                                                              |          |
| 1554612_at   | -3.34  | -2.21 | KIAA0226                                                                                     | KIAA0226 |
| 227143_s_at  | -2.64  | -2.21 | BH3 interacting domain death agonist                                                         | BID      |
| 224776_at    | -2.08  | -2.21 | 1-acylglycerol-3-phosphate O-acyltransferase 6 (lysophosphatidic acid acyltransferase, zeta) | AGPAT6   |
| 203837_at    | -2.17  | -2.20 | mitogen-activated protein kinase kinase kinase 5                                             | MAP3K5   |
| 217591_at    | -14.38 | -2.20 |                                                                                              |          |
| 229027_at    | -2.03  | -2.20 |                                                                                              |          |
| 226215_s_at  | -3.53  | -2.20 | F-box and leucine-rich repeat protein 10                                                     | FBXL10   |
| 1556589_at   | -3.37  | -2.20 |                                                                                              |          |
| 212651_at    | -3.66  | -2.20 | Rho-related BTB domain containing 1                                                          | RHOBTB1  |
| 218543_s_at  | -2.19  | -2.20 | poly (ADP-ribose) polymerase family, member 12                                               | PARP12   |
| 208854_s_at  | -3.29  | -2.20 | serine/threonine kinase 24 (STE20 homolog, yeast)                                            | STK24    |
| 226765_at    | -3.08  | -2.20 | spectrin, beta, non-erythrocytic 1                                                           | SPTBN1   |

|              |       |       |                                                                                |          |
|--------------|-------|-------|--------------------------------------------------------------------------------|----------|
| 209341_s_at  | -2.72 | -2.20 | inhibitor of kappa light polypeptide gene enhancer in B-cells, kinase beta     | IKBKB    |
| 203044_at    | -2.69 | -2.20 | carbohydrate (chondroitin) synthase 1                                          | CHSY1    |
| 230389_at    | -2.53 | -2.20 | formin binding protein 1                                                       | FNBP1    |
| 223093_at    | -2.63 | -2.19 | ankylosis, progressive homolog (mouse)                                         | ANKH     |
| 218176_at    | -2.56 | -2.19 | melanoma antigen family F, 1                                                   | MAGEF1   |
| 214964_at    | -2.85 | -2.19 |                                                                                |          |
| 212014_x_at  | -4.36 | -2.19 | CD44 molecule (Indian blood group)                                             | CD44     |
| 203600_s_at  | -3.93 | -2.19 | chromosome 4 open reading frame 8                                              | C4orf8   |
| 207319_s_at  | -2.43 | -2.19 | cell division cycle 2-like 5 (cholinesterase-related cell division controller) | CDC2L5   |
| 231049_at    | -4.92 | -2.19 | LIM domain only 2 (rhombotin-like 1)                                           | LMO2     |
| 1552625_a_at | -2.56 | -2.19 | tRNA nucleotidyl transferase, CCA-adding, 1                                    | TRNT1    |
| 235295_at    | -2.63 | -2.19 |                                                                                |          |
| 243395_at    | -3.38 | -2.18 |                                                                                |          |
| 228073_at    | -2.58 | -2.18 | N-acetylneuraminic acid phosphatase                                            | NANP     |
| 229814_at    | -2.24 | -2.18 |                                                                                |          |
| 227804_at    | -2.14 | -2.18 | TLC domain containing 1                                                        | TLCD1    |
| 222471_s_at  | -2.77 | -2.18 | potassium channel modulatory factor 1                                          | KCMF1    |
| 213725_x_at  | -2.92 | -2.18 | xylosyltransferase I                                                           | XYLT1    |
| 217889_s_at  | -4.31 | -2.18 | cytochrome b reductase 1                                                       | CYBRD1   |
| 218262_at    | -4.20 | -2.18 | required for meiotic nuclear division 5 homolog B (S. cerevisiae)              | RMND5B   |
| 202860_at    | -3.70 | -2.18 | DENN/MADD domain containing 4B                                                 | DENND4B  |
| 225115_at    | -2.62 | -2.18 | homeodomain interacting protein kinase 2                                       | HIPK2    |
| 231964_at    | -2.22 | -2.18 |                                                                                |          |
| 202478_at    | -2.63 | -2.18 | tribbles homolog 2 (Drosophila)                                                | TRIB2    |
| 226485_at    | -3.49 | -2.18 |                                                                                |          |
| 230263_s_at  | -3.26 | -2.18 | dedicator of cytokinesis 5                                                     | DOCK5    |
| 1570165_at   | -3.82 | -2.17 |                                                                                |          |
| 218041_x_at  | -3.96 | -2.17 | solute carrier family 38, member 2                                             | SLC38A2  |
| 203075_at    | -2.32 | -2.17 | SMAD family member 2                                                           | SMAD2    |
| 204549_at    | -3.20 | -2.17 | inhibitor of kappa light polypeptide gene enhancer in B-cells, kinase epsilon  | IKBKE    |
| 214356_s_at  | -2.50 | -2.17 |                                                                                |          |
| 1568592_at   | -2.71 | -2.17 | tripartite motif-containing 69                                                 | TRIM69   |
| 228869_at    | -2.71 | -2.17 |                                                                                |          |
| 225447_at    | -2.97 | -2.17 | glycerol-3-phosphate dehydrogenase 2 (mitochondrial)                           | GPD2     |
| 221485_at    | -2.30 | -2.17 | UDP-Gal:betaGlcNAc beta 1,4-galactosyltransferase, polypeptide 5               | B4GALT5  |
| 1558426_x_at | -3.17 | -2.17 | transmembrane protein 142B                                                     | TMEM142B |
| 228565_at    | -2.48 | -2.17 |                                                                                |          |
| 244774_at    | -2.23 | -2.17 |                                                                                |          |

|              |        |       |                                                                                  |          |
|--------------|--------|-------|----------------------------------------------------------------------------------|----------|
| 223805_at    | -2.61  | -2.16 | oxysterol binding protein-like 6                                                 | OSBPL6   |
| 226368_at    | -2.58  | -2.16 | carbohydrate (chondroitin 4)<br>sulfotransferase 11                              | CHST11   |
| 211077_s_at  | -2.50  | -2.16 | tousled-like kinase 1                                                            | TLK1     |
| 222793_at    | -2.70  | -2.16 | DEAD (Asp-Glu-Ala-Asp) box<br>polypeptide 58                                     | DDX58    |
| 202173_s_at  | -4.50  | -2.16 | vascular endothelial zinc finger 1                                               | VEZF1    |
| 209106_at    | -3.89  | -2.16 | nuclear receptor coactivator 1                                                   | NCOA1    |
| 244461_at    | -2.88  | -2.16 | sperm antigen with calponin<br>homology and coiled-coil domains 1                | SPECC1   |
| 205510_s_at  | -3.12  | -2.16 |                                                                                  |          |
| 226909_at    | -2.98  | -2.16 |                                                                                  |          |
| 212146_at    | -2.04  | -2.16 | pleckstrin homology domain<br>containing, family M (with RUN<br>domain) member 2 | PLEKHM2  |
| 217682_at    | -2.29  | -2.16 |                                                                                  |          |
| 1557316_at   | -2.42  | -2.16 |                                                                                  |          |
| 200899_s_at  | -2.33  | -2.16 | meningioma expressed antigen 5<br>(hyaluronidase)                                | MGEA5    |
| 229713_at    | -2.14  | -2.15 |                                                                                  |          |
| 225411_at    | -2.56  | -2.15 |                                                                                  |          |
| 227167_s_at  | -2.70  | -2.15 |                                                                                  |          |
| 1552664_at   | -2.55  | -2.15 | folliculin                                                                       | FLCN     |
| 226473_at    | -5.27  | -2.15 | chromobox homolog 2 (Pc class<br>homolog, Drosophila)                            | CBX2     |
| 201234_at    | -5.16  | -2.15 | integrin-linked kinase                                                           | ILK      |
| 232001_at    | -2.65  | -2.15 |                                                                                  |          |
| 224215_s_at  | -2.57  | -2.15 | delta-like 1 (Drosophila)                                                        | DLL1     |
| 217824_at    | -2.20  | -2.15 | ubiquitin-conjugating enzyme E2, J1<br>(UBC6 homolog, yeast)                     | UBE2J1   |
| 244653_at    | -3.18  | -2.15 | SET domain containing (lysine<br>methyltransferase) 7                            | SETD7    |
| 239719_at    | -2.42  | -2.15 | CD109 molecule                                                                   | CD109    |
| 213689_x_at  | -2.02  | -2.15 | ribosomal protein L5                                                             | RPL5     |
| 219501_at    | -2.11  | -2.15 |                                                                                  |          |
| 224458_at    | -4.35  | -2.15 | chromosome 9 open reading frame<br>125                                           | C9orf125 |
| 222597_at    | -15.23 | -2.15 | synaptosomal-associated protein,<br>29kDa                                        | SNAP29   |
| 204520_x_at  | -4.31  | -2.15 | bromodomain containing 1                                                         | BRD1     |
| 229274_at    | -4.13  | -2.15 | GNAS complex locus                                                               | GNAS     |
| 213792_s_at  | -2.15  | -2.15 |                                                                                  |          |
| 1555294_a_at | -2.89  | -2.15 | ELKS/RAB6-interacting/CAST<br>family member 1                                    | ERC1     |
| 206034_at    | -2.57  | -2.14 | serpin peptidase inhibitor, clade B<br>(ovalbumin), member 8                     | SERPINB8 |
| 212646_at    | -2.98  | -2.14 | raftlin, lipid raft linker 1                                                     | RFTN1    |
| 222799_at    | -2.32  | -2.14 |                                                                                  |          |
| 229167_at    | -3.42  | -2.14 |                                                                                  |          |
| 235292_at    | -2.02  | -2.14 |                                                                                  |          |
| 227049_at    | -4.65  | -2.14 |                                                                                  |          |
| 227531_at    | -3.39  | -2.14 |                                                                                  |          |

|             |        |       |                                                                                         |          |
|-------------|--------|-------|-----------------------------------------------------------------------------------------|----------|
| 201963_at   | -5.14  | -2.14 | acyl-CoA synthetase long-chain family member 1                                          | ACSL1    |
| 236922_at   | -2.28  | -2.14 |                                                                                         |          |
| 45749_at    | -2.70  | -2.14 | family with sequence similarity 65, member A                                            | FAM65A   |
| 218854_at   | -2.01  | -2.14 | dermatan sulfate epimerase                                                              | DSE      |
| 204789_at   | -2.57  | -2.14 | formin-like 1                                                                           | FMNL1    |
| 214651_s_at | -2.02  | -2.13 | homeobox A9                                                                             | HOXA9    |
| 222142_at   | -2.03  | -2.13 | cyldromatosis (turban tumor syndrome)                                                   | CYLD     |
| 213168_at   | -2.17  | -2.13 | Sp3 transcription factor                                                                | SP3      |
| 38398_at    | -2.61  | -2.13 | MAP-kinase activating death domain                                                      | MADD     |
| 213153_at   | -4.43  | -2.13 | SET domain containing 1B                                                                | SETD1B   |
| 210916_s_at | -4.47  | -2.13 | CD44 molecule (Indian blood group)                                                      | CD44     |
| 218928_s_at | -5.24  | -2.13 | solute carrier family 37 (glycerol-3-phosphate transporter), member 1                   | SLC37A1  |
| 231312_at   | -2.33  | -2.13 |                                                                                         |          |
| 205210_at   | -2.70  | -2.13 | transforming growth factor, beta receptor associated protein 1                          | TGFBRAP1 |
| 201594_s_at | -3.00  | -2.13 | protein phosphatase 4, regulatory subunit 1                                             | PPP4R1   |
| 218819_at   | -2.52  | -2.13 | integrator complex subunit 6                                                            | INTS6    |
| 209822_s_at | -2.22  | -2.13 | very low density lipoprotein receptor                                                   | VLDLR    |
| 213258_at   | -2.93  | -2.13 | tissue factor pathway inhibitor (lipoprotein-associated coagulation inhibitor)          | TFPI     |
| 36129_at    | -2.47  | -2.13 | RUN and TBC1 domain containing 1                                                        | RUTBC1   |
| 217234_s_at | -2.92  | -2.13 | villin 2 (ezrin)                                                                        | VIL2     |
| 243561_at   | -2.53  | -2.13 |                                                                                         |          |
| 227692_at   | -2.57  | -2.13 | guanine nucleotide binding protein (G protein), alpha inhibiting activity polypeptide 1 | GNAI1    |
| 225033_at   | -49.39 | -2.13 |                                                                                         |          |
| 210754_s_at | -3.66  | -2.12 | v-yes-1 Yamaguchi sarcoma viral related oncogene homolog                                | LYN      |
| 200791_s_at | -2.26  | -2.12 | IQ motif containing GTPase activating protein 1                                         | IQGAP1   |
| 225897_at   | -2.61  | -2.12 |                                                                                         |          |
| 232129_s_at | -2.36  | -2.12 | leucine zipper, putative tumor suppressor 2                                             | LZTS2    |
| 209446_s_at | -9.78  | -2.12 | chromosome 7 open reading frame 44                                                      | C7orf44  |
| 220305_at   | -3.14  | -2.12 |                                                                                         |          |
| 221905_at   | -3.15  | -2.12 | cyldromatosis (turban tumor syndrome)                                                   | CYLD     |
| 205242_at   | -30.33 | -2.12 | chemokine (C-X-C motif) ligand 13 (B-cell chemoattractant)                              | CXCL13   |
| 203297_s_at | -2.08  | -2.12 | jumonji, AT rich interactive domain 2                                                   | JARID2   |
| 201995_at   | -2.26  | -2.12 | exostoses (multiple) 1                                                                  | EXT1     |
| 214030_at   | -2.01  | -2.12 |                                                                                         |          |
| 226440_at   | -2.81  | -2.12 | dual specificity phosphatase 22                                                         | DUSP22   |
| 203188_at   | -4.84  | -2.12 | UDP-GlcNAc:betaGal beta-1,3-N-acetylglucosaminyltransferase 1                           | B3GNT1   |

|              |        |       |                                                                                      |         |
|--------------|--------|-------|--------------------------------------------------------------------------------------|---------|
| 208623_s_at  | -2.59  | -2.12 | villin 2 (ezrin)                                                                     | VIL2    |
| 202510_s_at  | -2.28  | -2.12 | tumor necrosis factor, alpha-induced protein 2                                       | TNFAIP2 |
| 218456_at    | -3.37  | -2.12 | C1q domain containing 1                                                              | C1QDC1  |
| 209542_x_at  | -4.87  | -2.12 | insulin-like growth factor 1 (somatomedin C)                                         | IGF1    |
| 226372_at    | -3.47  | -2.12 | carbohydrate (chondroitin 4) sulfotransferase 11                                     | CHST11  |
| 243928_s_at  | -2.24  | -2.12 | ATP-binding cassette, sub-family C (CFTR/MRP), member 4                              | ABCC4   |
| 218032_at    | -2.79  | -2.12 | stannin                                                                              | SNN     |
| 221858_at    | -2.07  | -2.12 | TBC1 domain family, member 12                                                        | TBC1D12 |
| 226689_at    | -3.33  | -2.12 | zinc finger, CDGSH-type domain 2                                                     | ZCD2    |
| 205389_s_at  | -2.59  | -2.11 | ankyrin 1, erythrocytic                                                              | ANK1    |
| 213010_at    | -6.55  | -2.11 | protein kinase C, delta binding protein                                              | PRKCDBP |
| 1559401_a_at | -2.21  | -2.11 |                                                                                      |         |
| 210846_x_at  | -2.50  | -2.11 | tripartite motif-containing 14                                                       | TRIM14  |
| 225814_at    | -2.06  | -2.11 | 5'-3' exoribonuclease 1                                                              | XRN1    |
| 208485_x_at  | -3.25  | -2.11 | CASP8 and FADD-like apoptosis regulator                                              | CFLAR   |
| 200984_s_at  | -2.90  | -2.11 | CD59 molecule, complement regulatory protein                                         | CD59    |
| 203420_at    | -2.42  | -2.11 | family with sequence similarity 8, member A1                                         | FAM8A1  |
| 209457_at    | -2.78  | -2.11 | dual specificity phosphatase 5                                                       | DUSP5   |
| 205594_at    | -3.61  | -2.11 | zinc finger protein 652                                                              | ZNF652  |
| 225764_at    | -2.58  | -2.11 | ets variant gene 6 (TEL oncogene)                                                    | ETV6    |
| 226830_x_at  | -3.11  | -2.11 | chromodomain helicase DNA binding protein 2                                          | CHD2    |
| 205247_at    | -2.09  | -2.11 | Notch homolog 4 (Drosophila)                                                         | NOTCH4  |
| 204413_at    | -2.40  | -2.11 | TNF receptor-associated factor 2                                                     | TRAF2   |
| 212233_at    | -2.47  | -2.11 |                                                                                      |         |
| 213579_s_at  | -2.88  | -2.10 | E1A binding protein p300                                                             | EP300   |
| 224705_s_at  | -2.24  | -2.10 | trinucleotide repeat containing 6A                                                   | TNRC6A  |
| 235595_at    | -2.19  | -2.10 | rho/rac guanine nucleotide exchange factor (GEF) 2                                   | ARHGEF2 |
| 221526_x_at  | -5.26  | -2.10 | par-3 partitioning defective 3 homolog (C. elegans)                                  | PARD3   |
| 203003_at    | -2.65  | -2.10 | MADS box transcription enhancer factor 2, polypeptide D (myocyte enhancer factor 2D) | MEF2D   |
| 201669_s_at  | -2.46  | -2.10 | myristoylated alanine-rich protein kinase C substrate                                | MARCKS  |
| 226018_at    | -2.49  | -2.10 | chromosome 7 open reading frame 41                                                   | C7orf41 |
| 223377_x_at  | -3.14  | -2.10 | cytokine inducible SH2-containing protein                                            | CISH    |
| 222494_at    | -2.17  | -2.10 | checkpoint suppressor 1                                                              | CHES1   |
| 209540_at    | -2.62  | -2.10 | insulin-like growth factor 1 (somatomedin C)                                         | IGF1    |
| 209925_at    | -17.31 | -2.10 | occludin                                                                             | OCLN    |
| 1556321_a_at | -2.07  | -2.10 |                                                                                      |         |

|             |       |       |                                                                                                      |           |
|-------------|-------|-------|------------------------------------------------------------------------------------------------------|-----------|
| 235061_at   | -2.00 | -2.10 | protein phosphatase 1K (PP2C domain containing)                                                      | PPM1K     |
| 202625_at   | -4.63 | -2.10 | v-yes-1 Yamaguchi sarcoma viral related oncogene homolog                                             | LYN       |
| 219317_at   | -8.73 | -2.10 | polymerase (DNA directed) iota                                                                       | POLI      |
| 1560156_at  | -2.38 | -2.10 |                                                                                                      |           |
| 218659_at   | -3.10 | -2.10 | additional sex combs like 2 (Drosophila)                                                             | ASXL2     |
| 230999_at   | -4.79 | -2.09 |                                                                                                      |           |
| 217910_x_at | -2.43 | -2.09 | MAX-like protein X                                                                                   | MLX       |
| 209811_at   | -2.51 | -2.09 | caspase 2, apoptosis-related cysteine peptidase (neural precursor cell expressed, developmentally do | CASP2     |
| 212519_at   | -2.33 | -2.09 | ubiquitin-conjugating enzyme E2E 1 (UBC4/5 homolog, yeast)                                           | UBE2E1    |
| 227545_at   | -2.66 | -2.09 |                                                                                                      |           |
| 225231_at   | -3.10 | -2.09 | Cas-Br-M (murine) ecotropic retroviral transforming sequence                                         | CBL       |
| 235478_at   | -3.75 | -2.09 | DNA cross-link repair 1C (PSO2 homolog, <i>S. cerevisiae</i> )                                       | DCLRE1C   |
| 221984_s_at | -3.50 | -2.09 | chromosome 2 open reading frame 17                                                                   | C2orf17   |
| 201866_s_at | -2.01 | -2.09 | nuclear receptor subfamily 3, group C, member 1 (glucocorticoid receptor)                            | NR3C1     |
| 209710_at   | -3.28 | -2.09 | GATA binding protein 2                                                                               | GATA2     |
| 201126_s_at | -3.38 | -2.09 | mannosyl (alpha-1,3-)-glycoprotein beta-1,2-N-acetylglucosaminyltransferase                          | MGAT1     |
| 206748_s_at | -2.74 | -2.09 | sperm associated antigen 9                                                                           | SPAG9     |
| 206710_s_at | -3.26 | -2.09 | erythrocyte membrane protein band 4.1-like 3                                                         | EPB41L3   |
| 226364_at   | -3.19 | -2.09 | huntingtin interacting protein 1                                                                     | HIP1      |
| 212471_at   | -2.34 | -2.08 | KIAA0241                                                                                             | KIAA0241  |
| 224162_s_at | -2.56 | -2.08 | F-box protein 31                                                                                     | FBXO31    |
| 201471_s_at | -3.10 | -2.08 | sequestosome 1                                                                                       | SQSTM1    |
| 224318_s_at | -2.18 | -2.08 |                                                                                                      |           |
| 226801_s_at | -2.40 | -2.08 |                                                                                                      |           |
| 209305_s_at | -4.13 | -2.08 | growth arrest and DNA-damage-inducible, beta                                                         | GADD45B   |
| 202968_s_at | -2.74 | -2.08 | dual-specificity tyrosine-(Y)-phosphorylation regulated kinase 2                                     | DYRK2     |
| 228314_at   | -2.42 | -2.08 |                                                                                                      |           |
| 34726_at    | -2.00 | -2.08 | calcium channel, voltage-dependent, beta 3 subunit                                                   | CACNB3    |
| 1559172_at  | -2.32 | -2.08 |                                                                                                      |           |
| 225929_s_at | -2.17 | -2.08 | ring finger protein 213                                                                              | RNF213    |
| 226475_at   | -3.54 | -2.08 | family with sequence similarity 118, member A                                                        | FAM118A   |
| 212184_s_at | -2.49 | -2.08 | mitogen-activated protein kinase kinase kinase 7 interacting protein 2                               | MAP3K7IP2 |
| 1562850_at  | -2.88 | -2.08 |                                                                                                      |           |



|              |        |       |                                                                           |           |
|--------------|--------|-------|---------------------------------------------------------------------------|-----------|
| 209250_at    | -3.39  | -2.07 | degenerative spermatocyte homolog 1, lipid desaturase (Drosophila)        | DEGS1     |
| 202377_at    | -3.18  | -2.07 |                                                                           |           |
| 1564338_at   | -10.25 | -2.07 |                                                                           |           |
| 226607_at    | -2.12  | -2.07 | chromosome 20 open reading frame 194                                      | C20orf194 |
| 91703_at     | -2.30  | -2.07 | EH domain binding protein 1-like 1                                        | EHBP1L1   |
| 215460_x_at  | -5.27  | -2.07 | bromodomain containing 1                                                  | BRD1      |
| 203796_s_at  | -3.80  | -2.07 | B-cell CLL/lymphoma 7A                                                    | BCL7A     |
| 235777_at    | -5.77  | -2.07 | ankyrin repeat domain 44                                                  | ANKRD44   |
| 217734_s_at  | -2.63  | -2.07 | WD repeat domain 6                                                        | WDR6      |
| 1569521_s_at | -2.84  | -2.07 |                                                                           |           |
| 204494_s_at  | -4.72  | -2.07 | chromosome 15 open reading frame 39                                       | C15orf39  |
| 225157_at    | -2.52  | -2.07 | MLX interacting protein                                                   | MLXIP     |
| 219648_at    | -2.35  | -2.07 | melanoregulin                                                             | MREG      |
| 1552733_at   | -4.24  | -2.07 | kelch domain containing 1                                                 | KLHDC1    |
| 205926_at    | -2.49  | -2.07 | interleukin 27 receptor, alpha                                            | IL27RA    |
| 235766_x_at  | -3.95  | -2.06 | RAB27A, member RAS oncogene family                                        | RAB27A    |
| 200897_s_at  | -2.58  | -2.06 | palladin, cytoskeletal associated protein                                 | PALLD     |
| 219880_at    | -2.38  | -2.06 |                                                                           |           |
| 200985_s_at  | -3.18  | -2.06 | CD59 molecule, complement regulatory protein                              | CD59      |
| 202981_x_at  | -2.01  | -2.06 | seven in absentia homolog 1 (Drosophila)                                  | SIAH1     |
| 219183_s_at  | -3.37  | -2.06 | pleckstrin homology, Sec7 and coiled-coil domains 4                       | PSCD4     |
| 214743_at    | -2.44  | -2.06 | cut-like 1, CCAAT displacement protein (Drosophila)                       | CUTL1     |
| 226568_at    | -3.05  | -2.06 | family with sequence similarity 102, member B                             | FAM102B   |
| 200660_at    | -3.85  | -2.06 | S100 calcium binding protein A11                                          | S100A11   |
| 41386_i_at   | -3.87  | -2.06 | jumonji domain containing 3                                               | JMJD3     |
| 1560743_a_at | -3.91  | -2.06 |                                                                           |           |
| 219457_s_at  | -8.85  | -2.06 | Ras and Rab interactor 3                                                  | RIN3      |
| 214696_at    | -2.79  | -2.05 |                                                                           |           |
| 224906_at    | -2.68  | -2.05 | transmembrane protein 16F                                                 | TMEM16F   |
| 201220_x_at  | -3.03  | -2.05 | C-terminal binding protein 2                                              | CTBP2     |
| 209688_s_at  | -3.22  | -2.05 | coiled-coil domain containing 93                                          | CCDC93    |
| 209414_at    | -5.01  | -2.05 | fizzy/cell division cycle 20 related 1 (Drosophila)                       | FZR1      |
| 209487_at    | -4.12  | -2.05 | RNA binding protein with multiple splicing                                | RBPMS     |
| 201660_at    | -2.52  | -2.05 |                                                                           |           |
| 227930_at    | -3.24  | -2.05 | eukaryotic translation initiation factor 2C, 4                            | EIF2C4    |
| 209941_at    | -2.04  | -2.05 | receptor (TNFRSF)-interacting serine-threonine kinase 1                   | RIPK1     |
| 211105_s_at  | -6.12  | -2.05 | nuclear factor of activated T-cells, cytoplasmic, calcineurin-dependent 1 | NFATC1    |
| 212856_at    | -2.07  | -2.05 |                                                                           |           |

|              |       |       |                                                                                                |         |
|--------------|-------|-------|------------------------------------------------------------------------------------------------|---------|
| 233353_at    | -2.07 | -2.05 |                                                                                                |         |
| 203397_s_at  | -4.84 | -2.05 | UDP-N-acetyl-alpha-D-galactosamine:polypeptide N-acetylgalactosaminyltransferase 3 (GalNAc-T3) | GALNT3  |
| 224046_s_at  | -2.64 | -2.05 | phosphodiesterase 7A                                                                           | PDE7A   |
| 218871_x_at  | -3.39 | -2.05 |                                                                                                |         |
| 228702_at    | -4.33 | -2.04 |                                                                                                |         |
| 225478_at    | -3.29 | -2.04 | malignant fibrous histiocytoma amplified sequence 1                                            | MFHAS1  |
| 214606_at    | -3.62 | -2.04 | tetraspanin 2                                                                                  | TSPAN2  |
| 225532_at    | -6.49 | -2.04 | Cdk5 and Abl enzyme substrate 1                                                                | CABLES1 |
| 221245_s_at  | -4.13 | -2.04 | frizzled homolog 5 (Drosophila)                                                                | FZD5    |
| 219282_s_at  | -2.67 | -2.04 | transient receptor potential cation channel, subfamily V, member 2                             | TRPV2   |
| 226885_at    | -2.86 | -2.04 |                                                                                                |         |
| 232752_at    | -4.77 | -2.04 |                                                                                                |         |
| 212472_at    | -2.67 | -2.04 | microtubule associated monooxygenase, calponin and LIM domain containing 2                     | MICAL2  |
| 1556474_a_at | -4.10 | -2.03 |                                                                                                |         |
| 204683_at    | -2.86 | -2.03 | intercellular adhesion molecule 2                                                              | ICAM2   |
| 45687_at     | -2.53 | -2.03 | proline rich 14                                                                                | PRR14   |
| 212465_at    | -2.55 | -2.03 | SET domain containing 3                                                                        | SETD3   |
| 224783_at    | -3.52 | -2.03 | family with sequence similarity 100, member B                                                  | FAM100B |
| 227036_at    | -6.71 | -2.03 |                                                                                                |         |
| 202417_at    | -2.81 | -2.03 | kelch-like ECH-associated protein 1                                                            | KEAP1   |
| 202378_s_at  | -2.53 | -2.03 | leptin receptor overlapping transcript                                                         | LEPROT  |
| 209515_s_at  | -2.10 | -2.03 | RAB27A, member RAS oncogene family                                                             | RAB27A  |
| 226297_at    | -3.26 | -2.03 | homeodomain interacting protein kinase 3                                                       | HIPK3   |
| 200083_at    | -2.59 | -2.03 | ubiquitin specific peptidase 22                                                                | USP22   |
| 210007_s_at  | -2.67 | -2.03 | glycerol-3-phosphate dehydrogenase 2 (mitochondrial)                                           | GPD2    |
| 212285_s_at  | -2.89 | -2.03 | agrin                                                                                          | AGRIN   |
| 224861_at    | -2.46 | -2.03 |                                                                                                |         |
| 1558807_at   | -2.24 | -2.03 | ATPase family, AAA domain containing 2B                                                        | ATAD2B  |
| 213389_at    | -2.57 | -2.03 | zinc finger protein 592                                                                        | ZNF592  |
| 213116_at    | -3.64 | -2.03 | NIMA (never in mitosis gene a)-related kinase 3                                                | NEK3    |
| 229268_at    | -2.13 | -2.03 | family with sequence similarity 105, member B                                                  | FAM105B |
| 240824_at    | -2.10 | -2.02 | oligonucleotide/oligosaccharide-binding fold containing 1                                      | OBFC1   |
| 205469_s_at  | -7.54 | -2.02 | interferon regulatory factor 5                                                                 | IRF5    |
| 226774_at    | -2.17 | -2.02 | family with sequence similarity 120B                                                           | FAM120B |
| 226554_at    | -5.98 | -2.02 | zinc finger and BTB domain containing 7A                                                       | ZBTB7A  |

|              |        |       |                                                                                             |          |
|--------------|--------|-------|---------------------------------------------------------------------------------------------|----------|
| 206437_at    | -3.38  | -2.02 | endothelial differentiation,<br>lysophosphatidic acid G-protein-<br>coupled receptor, 6     | EDG6     |
| 221698_s_at  | -2.62  | -2.02 | C-type lectin domain family 7,<br>member A                                                  | CLEC7A   |
| 204040_at    | -2.67  | -2.02 | ring finger protein 144                                                                     | RNF144   |
| 222156_x_at  | -2.77  | -2.02 | cell cycle progression 1                                                                    | CCPG1    |
| 205098_at    | -2.82  | -2.02 | chemokine (C-C motif) receptor 1                                                            | CCR1     |
| 204491_at    | -2.08  | -2.02 | phosphodiesterase 4D, cAMP-<br>specific (phosphodiesterase E3 dunce<br>homolog, Drosophila) | PDE4D    |
| 1564301_a_at | -2.18  | -2.02 | RPA interacting protein                                                                     | RPAIN    |
| 201494_at    | -2.64  | -2.02 | prolylcarboxypeptidase<br>(angiotensinase C)                                                | PRCP     |
| 221806_s_at  | -2.72  | -2.02 | SET domain containing 5                                                                     | SETD5    |
| 236346_at    | -2.79  | -2.02 | zinc finger protein 83                                                                      | ZNF83    |
| 205429_s_at  | -2.03  | -2.02 | membrane protein, palmitoylated 6<br>(MAGUK p55 subfamily member 6)                         | MPP6     |
| 212976_at    | -2.05  | -2.01 |                                                                                             |          |
| 1561439_at   | -2.81  | -2.01 |                                                                                             |          |
| 225355_at    | -4.21  | -2.01 |                                                                                             |          |
| 221221_s_at  | -3.11  | -2.01 | kelch-like 3 (Drosophila)                                                                   | KLHL3    |
| 230707_at    | -2.23  | -2.01 | sortilin-related receptor, L(DLR<br>class) A repeats-containing                             | SORL1    |
| 240432_x_at  | -7.54  | -2.01 |                                                                                             |          |
| 1568752_s_at | -5.04  | -2.01 | regulator of G-protein signalling 13                                                        | RGS13    |
| 227344_at    | -2.81  | -2.01 | IKAROS family zinc finger 1<br>(Ikaros)                                                     | IKZF1    |
| 235076_at    | -2.01  | -2.01 | calcium binding and coiled-coil<br>domain 2                                                 | CALCOCO2 |
| 241812_at    | -2.10  | -2.01 |                                                                                             |          |
| 202626_s_at  | -4.27  | -2.01 | v-yes-1 Yamaguchi sarcoma viral<br>related oncogene homolog                                 | LYN      |
| 224995_at    | -2.85  | -2.01 | spire homolog 1 (Drosophila)                                                                | SPIRE1   |
| 238787_at    | -2.22  | -2.01 |                                                                                             |          |
| 235179_at    | -2.44  | -2.01 | zinc finger protein 641                                                                     | ZNF641   |
| 242790_at    | -3.62  | -2.01 |                                                                                             |          |
| 204713_s_at  | -2.87  | -2.01 | coagulation factor V (proaccelerin,<br>labile factor)                                       | F5       |
| 212573_at    | -2.28  | -2.01 | endonuclease domain containing 1                                                            | ENDOD1   |
| 229115_at    | -2.02  | -2.01 | dynein, cytoplasmic 1, heavy chain 1                                                        | DYNC1H1  |
| 235458_at    | -11.36 | -2.00 | hepatitis A virus cellular receptor 2                                                       | HAVCR2   |
| 224834_at    | -2.96  | -2.00 | ubiquitin domain containing 2                                                               | UBTD2    |
| 225707_at    | -2.76  | -2.00 | ADP-ribosylation-like factor 6<br>interacting protein 6                                     | ARL6IP6  |
| 243_g_at     | -2.07  | -2.00 | microtubule-associated protein 4                                                            | MAP4     |
| 209110_s_at  | -3.30  | -2.00 | ral guanine nucleotide dissociation<br>stimulator-like 2                                    | RGL2     |
| 221704_s_at  | -3.22  | -2.00 | vacuolar protein sorting 37 homolog<br>B ( <i>S. cerevisiae</i> )                           | VPS37B   |
| 222780_s_at  | -3.63  | -2.00 | brain and acute leukemia,<br>cytoplasmic                                                    | BAALC    |
| 223325_at    | -4.14  | -2.00 | thioredoxin domain containing 11                                                            | TXNDC11  |

210249\_s\_at

-2.99

-2.00

nuclear receptor coactivator 1

NCOA1

---
