# Supplementary material for: In Vitro Transformation of Primary Human CD34+ Cells by AML Fusion Oncogenes: Early Gene Expression Profiling Reveals Possible Drug Target in AML
Source: PubMed Central journal article supplement (PMC2929205; doi:10.1371/journal.pone.0012464), 2010-08-27
Supplement: pone.0012464.s006.pdf [file pone.0012464.s006.pdf]

**Table S6.** Genes deregulated by PML-RARA at 8 d after transduction

| Probe set ID | Fold Change |        | Gene Name                                                                        | Gene Symbol |
|--------------|-------------|--------|----------------------------------------------------------------------------------|-------------|
|              | Exp.1       | Exp.2  |                                                                                  |             |
| 221169_s_at  | 16.05       | 4.09   | histamine receptor H4                                                            | HRH4        |
| 215507_x_at  | 10.29       | 3.44   | RAB22A, member RAS oncogene family                                               | RAB22A      |
| 206291_at    | 6.68        | 2.86   | neurotensin                                                                      | NTS         |
| 1564438_at   | 3.75        | 6.66   |                                                                                  |             |
| 224459_at    | 3.73        | 2.61   | L-2-hydroxyglutarate dehydrogenase                                               | L2HGDH      |
| 215674_at    | 3.48        | 2.10   |                                                                                  |             |
| 208712_at    | 2.89        | 5.23   | cyclin D1                                                                        | CCND1       |
| 213348_at    | 2.88        | 2.52   | cyclin-dependent kinase inhibitor 1C (p57, Kip2)                                 | CDKN1C      |
| 233945_at    | 2.86        | 2.21   | UDP-glucose ceramide glucosyltransferase-like 2                                  | UGCGL2      |
| 1552908_at   | 2.67        | 3.65   | chromosome 1 open reading frame 150                                              | C1orf150    |
| 201110_s_at  | 2.55        | 2.83   | thrombospondin 1                                                                 | THBS1       |
| 223805_at    | 2.50        | 2.84   | oxysterol binding protein-like 6                                                 | OSBPL6      |
| 236845_at    | 2.44        | 2.44   |                                                                                  |             |
| 209881_s_at  | 2.28        | 2.26   | linker for activation of T cells                                                 | LAT         |
| 215810_x_at  | 2.25        | 3.44   |                                                                                  |             |
| 211696_x_at  | 2.18        | 3.49   | hemoglobin, beta                                                                 | HBB         |
| 235062_at    | 2.17        | 6.59   | PIH1 domain containing 2                                                         | PIH1D2      |
| 206306_at    | 2.14        | 2.56   | ryanodine receptor 3                                                             | RYR3        |
| 201150_s_at  | 2.07        | 3.75   | TIMP metalloproteinase inhibitor 3 (Sorsby fundus dystrophy, pseudoinflammatory) | TIMP3       |
| 205609_at    | 2.05        | 2.08   | angiopoietin 1                                                                   | ANGPT1      |
| 216191_s_at  | 2.02        | 2.04   | T cell receptor alpha locus                                                      | TRA@        |
| 239617_at    | 2.02        | 5.28   |                                                                                  |             |
| 237034_at    | 2.02        | 2.51   |                                                                                  |             |
| 223958_s_at  | 2.01        | 2.39   | dynein, axonemal, light chain 1                                                  | DNAL1       |
| 1558019_at   | -2.00       | -2.49  |                                                                                  |             |
| 1569827_at   | -2.01       | -2.37  | ATG7 autophagy related 7 homolog (S. cerevisiae)                                 | ATG7        |
| 1554229_at   | -2.01       | -2.17  |                                                                                  |             |
| 227842_at    | -2.02       | -8.25  | RAB30, member RAS oncogene family                                                | RAB30       |
| 1555024_at   | -2.03       | -2.23  | ADAM metalloproteinase domain 22                                                 | ADAM22      |
| 214428_x_at  | -2.03       | -4.43  | complement component 4A (Rodgers blood group)                                    | C4A         |
| 234611_at    | -2.04       | -3.94  |                                                                                  |             |
| 243324_x_at  | -2.04       | -12.50 |                                                                                  |             |
| 207665_at    | -2.05       | -3.35  | ADAM metalloproteinase domain 21                                                 | ADAM21      |
| 204813_at    | -2.06       | -2.16  | mitogen-activated protein kinase 10                                              | MAPK10      |
| 1568720_at   | -2.07       | -2.21  | zinc finger protein 506                                                          | ZNF506      |
| 237673_at    | -2.10       | -2.41  |                                                                                  |             |
| 238586_at    | -2.11       | -3.18  | tyrosine kinase, non-receptor, 2                                                 | TNK2        |
| 242199_at    | -2.13       | -2.73  |                                                                                  |             |
| 1556936_at   | -2.13       | -2.40  |                                                                                  |             |
| 1560552_a_at | -2.14       | -2.30  |                                                                                  |             |
| 243934_at    | -2.14       | -2.47  |                                                                                  |             |
| 1555289_at   | -2.18       | -3.92  | leucine zipper transcription regulator 2                                         | LZTR2       |

|               |       |        |                                                                              |          |
|---------------|-------|--------|------------------------------------------------------------------------------|----------|
| 204195_s_at   | -2.20 | -2.46  | PBX/knotted 1 homeobox 1                                                     | PKNOX1   |
| 1562908_at    | -2.20 | -2.16  |                                                                              |          |
| 1553523_at    | -2.21 | -4.11  | NLR family, pyrin domain containing 14                                       | NLRP14   |
| 241992_at     | -2.21 | -2.08  |                                                                              |          |
| 211774_s_at   | -2.29 | -2.36  | methylmalonic aciduria (cobalamin deficiency) cblC type, with homocystinuria | MMACHC   |
| 1555340_x_at  | -2.29 | -3.46  | RAP1A, member of RAS oncogene family                                         | RAP1A    |
| 1556175_at    | -2.34 | -4.16  |                                                                              |          |
| 1558964_at    | -2.36 | -4.27  | FAT tumor suppressor homolog 3 (Drosophila)                                  | FAT3     |
| 1561604_at    | -2.42 | -2.00  |                                                                              |          |
| 1557584_at    | -2.45 | -2.01  |                                                                              |          |
| 1555339_at    | -2.45 | -2.13  | RAP1A, member of RAS oncogene family                                         | RAP1A    |
| 211106_at     | -2.48 | -2.86  | suppressor of Ty 3 homolog (S. cerevisiae)                                   | SUPT3H   |
| 244475_at     | -2.50 | -3.47  |                                                                              |          |
| 234548_at     | -2.52 | -3.39  |                                                                              |          |
| 1567031_at    | -2.53 | -4.72  | zinc finger protein 160                                                      | ZNF160   |
| 1560264_at    | -2.54 | -2.47  |                                                                              |          |
| 234239_at     | -2.61 | -2.35  |                                                                              |          |
| 241555_at     | -2.63 | -4.61  |                                                                              |          |
| AFFX-HUMRGE/∅ | -2.65 | -2.50  |                                                                              |          |
| 233282_at     | -2.65 | -3.53  |                                                                              |          |
| 244504_x_at   | -2.66 | -3.77  | ADP-ribosylation factor 1                                                    | ARF1     |
| 217102_at     | -2.67 | -5.95  |                                                                              |          |
| 1561207_at    | -2.69 | -2.37  |                                                                              |          |
| 205590_at     | -2.78 | -6.26  | RAS guanyl releasing protein 1 (calcium and DAG-regulated)                   | RASGRP1  |
| 1569786_at    | -2.79 | -3.25  |                                                                              |          |
| 204665_at     | -2.80 | -3.00  |                                                                              |          |
| 241700_at     | -2.87 | -3.36  | zinc finger homeodomain 4                                                    | ZFHX4    |
| 226487_at     | -2.87 | -9.43  | chromosome 12 open reading frame 34                                          | C12orf34 |
| 217206_at     | -2.93 | -2.64  |                                                                              |          |
| 212730_at     | -2.93 | -3.03  | desmuslin                                                                    | DMN      |
| 1569539_at    | -2.96 | -2.05  |                                                                              |          |
| 217579_x_at   | -3.23 | -3.32  |                                                                              |          |
| 203868_s_at   | -3.28 | -9.41  | vascular cell adhesion molecule 1                                            | VCAM1    |
| 220771_at     | -3.37 | -2.45  |                                                                              |          |
| 1564765_at    | -3.59 | -3.23  |                                                                              |          |
| 1563118_at    | -3.67 | -2.60  |                                                                              |          |
| 1557057_a_at  | -3.87 | -3.05  |                                                                              |          |
| 231367_s_at   | -3.94 | -2.19  |                                                                              |          |
| 1566087_at    | -4.15 | -2.88  |                                                                              |          |
| 1552991_at    | -4.43 | -15.36 | olfactory receptor, family 5, subfamily P, member 2                          | OR5P2    |
| 222301_at     | -4.51 | -2.70  | chromosome 1 open reading frame 61                                           | C1orf61  |
| 213877_x_at   | -4.75 | -2.77  | transcription elongation factor B (SIII), polypeptide 2 (18kDa, elongin B)   | TCEB2    |
| 1556801_at    | -4.85 | -2.10  |                                                                              |          |
| 232060_at     | -4.89 | -3.82  |                                                                              |          |
| 216408_at     | -5.11 | -31.11 | olfactory receptor, family 2, subfamily B, member 2                          | OR2B2    |
| 241636_x_at   | -5.17 | -2.34  |                                                                              |          |
| 222720_x_at   | -5.31 | -3.60  | chromosome 1 open reading frame 27                                           | C1orf27  |

|              |        |        |                                                         |          |
|--------------|--------|--------|---------------------------------------------------------|----------|
| 1553298_at   | -5.50  | -74.57 | chromosome 17 open reading frame 77                     | C17orf77 |
| 233683_at    | -5.51  | -5.71  |                                                         |          |
| 224050_s_at  | -6.23  | -2.98  |                                                         |          |
| 206415_at    | -7.72  | -2.03  | tolloid-like 1                                          | TLL1     |
| 237675_at    | -7.84  | -3.17  |                                                         |          |
| 1561679_at   | -10.02 | -2.13  |                                                         |          |
| 1555103_s_at | -16.66 | -2.41  | fibroblast growth factor 7 (keratinocyte growth factor) | FGF7     |
| 214967_at    | -18.97 | -16.37 |                                                         |          |
| 1561362_at   | -22.80 | -3.73  |                                                         |          |
| 238392_at    | -52.24 | -3.34  | translocation associated membrane protein 2             | TRAM2    |

---
